# Supplementary material for: Organic acid catalysed Minisci-type arylation of heterocycles with aryl acyl peroxides
Source: Royal Society of Chemistry journal article supplement (doi:10.1039/d2ob01187e), 2022-01-01

# **Organic-acid catalysed Minisci-type arylation of heterocycles with aryl acyl peroxides**

Yani Ouyang, Xiaoguang Yue, Jichai Peng, Jiashun Zhu, Qiuyuan Shen, Wanmei Li\*

College of Material, Chemistry and Chemical Engineering, Key Laboratory of Organosilicon Chemistry and Material Technology, Ministry of Education, Key Laboratory of Organosilicon Material Technology, Hangzhou Normal University, Hangzhou 310036, People's Republic of China. E-mail: liwanmei@hznu.edu.cn

## **Supporting Information**

### **Table of contents**

|                                               |          |
|-----------------------------------------------|----------|
| <b>1. Optimization of reaction conditions</b> | <b>2</b> |
| <b>2. Copies of NMR spectra</b>               | <b>5</b> |

# 1. Optimization of reaction conditions

## 1.1 Optimization of additives<sup>a,b</sup>

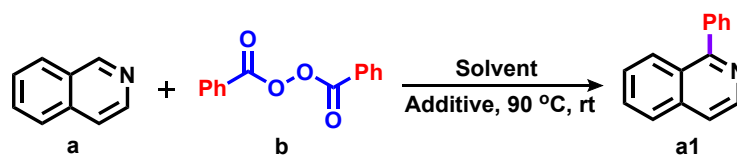

| Entry          | Temperature | Additive                             | Solvent | Time | Yield[%]<br><sup>b</sup> |
|----------------|-------------|--------------------------------------|---------|------|--------------------------|
| 1 <sup>a</sup> | 90          | TFA                                  | EtOAc   | 12   | 80                       |
| 2 <sup>c</sup> | 90          | -                                    | EtOAc   | 12   | trace                    |
| 3              | 90          | H <sub>2</sub> SO <sub>4</sub>       | EtOAc   | 12   | 0                        |
| 4              | 90          | HCl                                  | EtOAc   | 12   | 0                        |
| 5              | 90          | CH <sub>3</sub> COOH                 | EtOAc   | 12   | 39                       |
| 6              | 90          | methanesulfonic acid                 | EtOAc   | 12   | 0                        |
| 7              | 90          | trifluoromethanesulfonic acid        | EtOAc   | 12   | 22                       |
| 8              | 90          | pivalic acid                         | EtOAc   | 12   | trace                    |
| 9              | 90          | IRC <sup>d</sup>                     | EtOAc   | 12   | trace                    |
| 10             | 90          | 2-naphthalenesulfonic acid           | EtOAc   | 12   | 50                       |
| 11             | 90          | <i>p</i> -aminobenzene sulfonic acid | EtOAc   | 12   | 40                       |
| 12             | 90          | methylbenzoic acid                   | EtOAc   | 12   | 30                       |
| 13             | 90          | phenylboronic acid                   | EtOAc   | 12   | 56                       |
| 14             | 90          | Taurine                              | EtOAc   | 12   | 55                       |
| 15             | 90          | 2-naphthalene formic acid            | EtOAc   | 12   | 28                       |
| 16             | 90          | malic acid                           | EtOAc   | 12   | 67                       |
| 17             | 90          | fluorin boric acid                   | EtOAc   | 12   | 43                       |
| 18             | 90          | hydroiodic acid                      | EtOAc   | 12   | 24                       |

<sup>a</sup> Reaction condition: **a** (0.2 mmol), **b** (2.0 equiv), TFA (1 mol%), EtOAc (3 mL), 90 °C, rt, 12 h. <sup>b</sup> Isolated yields. <sup>c</sup> Without additive. <sup>d</sup> IRC = Cation exchange resin.

## 1.2 Optimization of solvents<sup>a,b</sup>

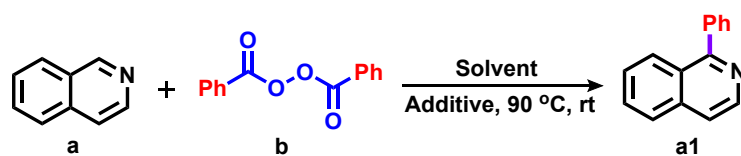

| Entry | Temperature | Additive | Solvent                                     | Time | Yield[%] <sup>b</sup> |
|-------|-------------|----------|---------------------------------------------|------|-----------------------|
| 1     | 90          | TFA      | CH <sub>3</sub> CN                          | 12   | 40                    |
| 2     | 90          | TFA      | C <sub>6</sub> H <sub>12</sub> <sup>c</sup> | 12   | 45                    |
| 3     | 90          | TFA      | Toluene                                     | 12   | 55                    |
| 4     | 90          | TFA      | Acetone                                     | 12   | 78                    |
| 5     | 90          | TFA      | DCE                                         | 12   | 52                    |
| 6     | 90          | TFA      | EtOAc                                       | 12   | 80                    |
| 7     | 90          | TFA      | DMF <sup>d</sup>                            | 12   | 0                     |
| 8     | 90          | TFA      | CCl <sub>4</sub>                            | 12   | 0                     |
| 9     | 90          | TFA      | THF                                         | 12   | 0                     |
| 10    | 90          | TFA      | DMSO                                        | 12   | 0                     |
| 11    | 90          | TFA      | H <sub>2</sub> O                            | 12   | 0                     |
| 12    | 90          | TFA      | 1,4-Dioxane                                 | 12   | 0                     |
| 13    | 90          | TFA      | DCM                                         | 12   | 20                    |
| 14    | 90          | TFA      | DMAC <sup>e</sup>                           | 12   | 0                     |
| 15    | 90          | TFA      | <i>n</i> -Hexane                            | 12   | 0                     |
| 16    | 90          | TFA      | Pyridine                                    | 12   | 28                    |

<sup>a</sup> Reaction condition: **a** (0.2 mmol), **b** (2.0 equiv), TFA (1 mol%), EtOAc (3 mL), 90 °C, rt, 12 h. <sup>b</sup> Isolated yields. <sup>c</sup> C<sub>6</sub>H<sub>12</sub> = Cyclohexane. <sup>d</sup> DMF = *N,N*-dimethylformamide. <sup>e</sup> DMAC = *N,N*-dimethylacetamide.

### 1.3 Optimization of temperature<sup>a,b</sup>

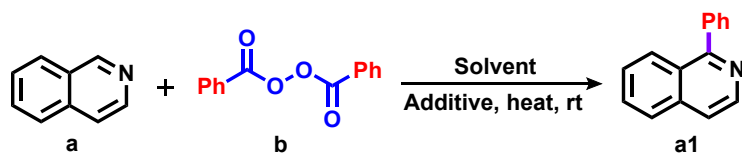

| Entry          | Temperature | Additive | Solvent | Time | Yield[%] <sup>b</sup> |
|----------------|-------------|----------|---------|------|-----------------------|
| 1 <sup>c</sup> | -           | TFA      | EtOAc   | 12   | 0                     |
| 2              | 20          | TFA      | EtOAc   | 12   | 0                     |
| 3              | 40          | TFA      | EtOAc   | 12   | 0                     |
| 4              | 60          | TFA      | EtOAc   | 12   | 20                    |
| 5              | 70          | TFA      | EtOAc   | 12   | 75                    |
| 6              | 80          | TFA      | EtOAc   | 12   | 72                    |
| 7              | 90          | TFA      | EtOAc   | 12   | 80                    |
| 8              | 100         | TFA      | EtOAc   | 12   | 68                    |
| 9              | 120         | TFA      | EtOAc   | 12   | 60                    |

<sup>a</sup> Reaction condition: **a** (0.2 mmol), **b** (2.0 equiv), TFA (1 mol%), EtOAc (3 mL), rt, 12 h. <sup>b</sup> Isolated yields. <sup>c</sup> Under room temperature.

### 1.4 Optimization of time<sup>a,b</sup>

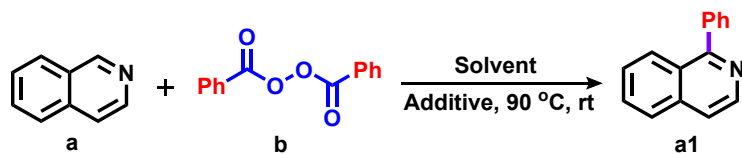

| Entry | Temperature | Additive | Solvent | Time | Yield[%] <sup>b</sup> |
|-------|-------------|----------|---------|------|-----------------------|
| 1     | 90          | TFA      | EtOAc   | 2    | 30                    |
| 2     | 90          | TFA      | EtOAc   | 6    | 50                    |
| 3     | 90          | TFA      | EtOAc   | 10   | 70                    |
| 4     | 90          | TFA      | EtOAc   | 12   | 80                    |
| 5     | 90          | TFA      | EtOAc   | 24   | 80                    |

<sup>a</sup> Reaction condition: **a** (0.2 mmol), **b** (2.0 equiv), TFA (1 mol%), EtOAc (3 mL), 90 °C, rt. <sup>b</sup> Isolated yields.



## 2. Copies of NMR spectra

### $^1\text{H}$ NMR Spectrum of Compound a1

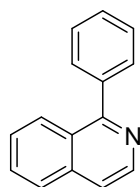

$^1\text{H}$  NMR ( $\text{CDCl}_3$ , 500 MHz)

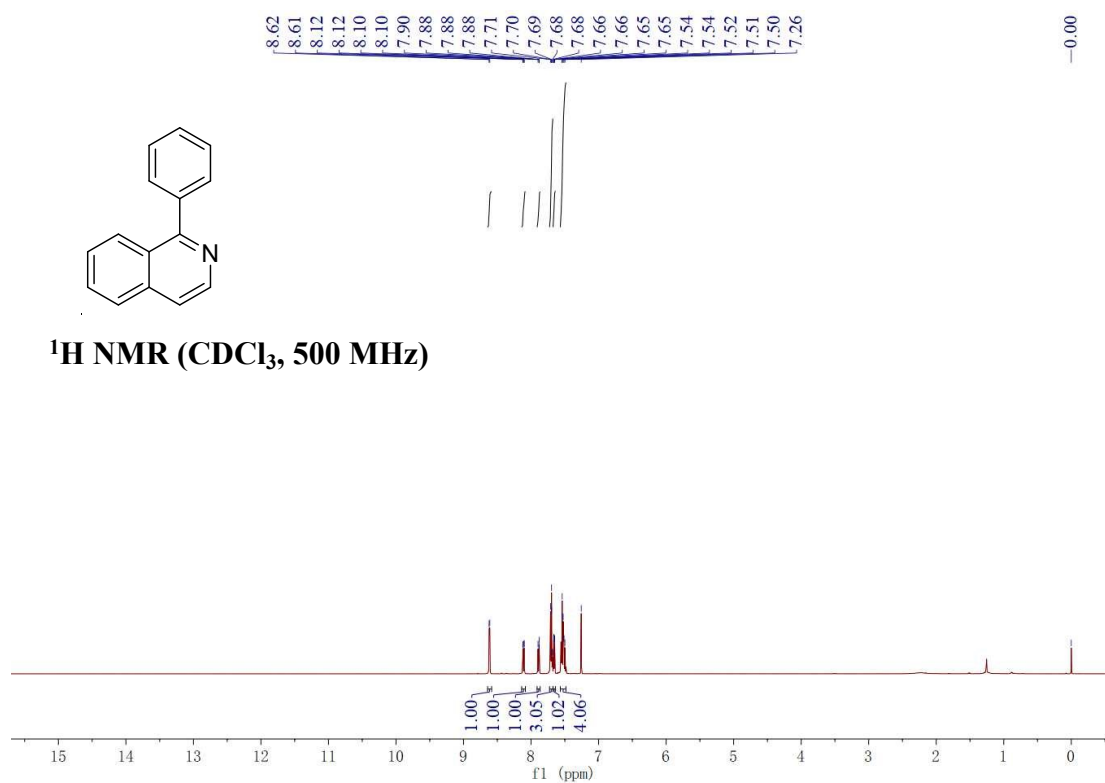

### $^{13}\text{C}\{^1\text{H}\}$ NMR Spectrum of Compound a1

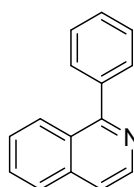

$^{13}\text{C}\{^1\text{H}\}$  NMR ( $\text{CDCl}_3$ , 126 MHz)

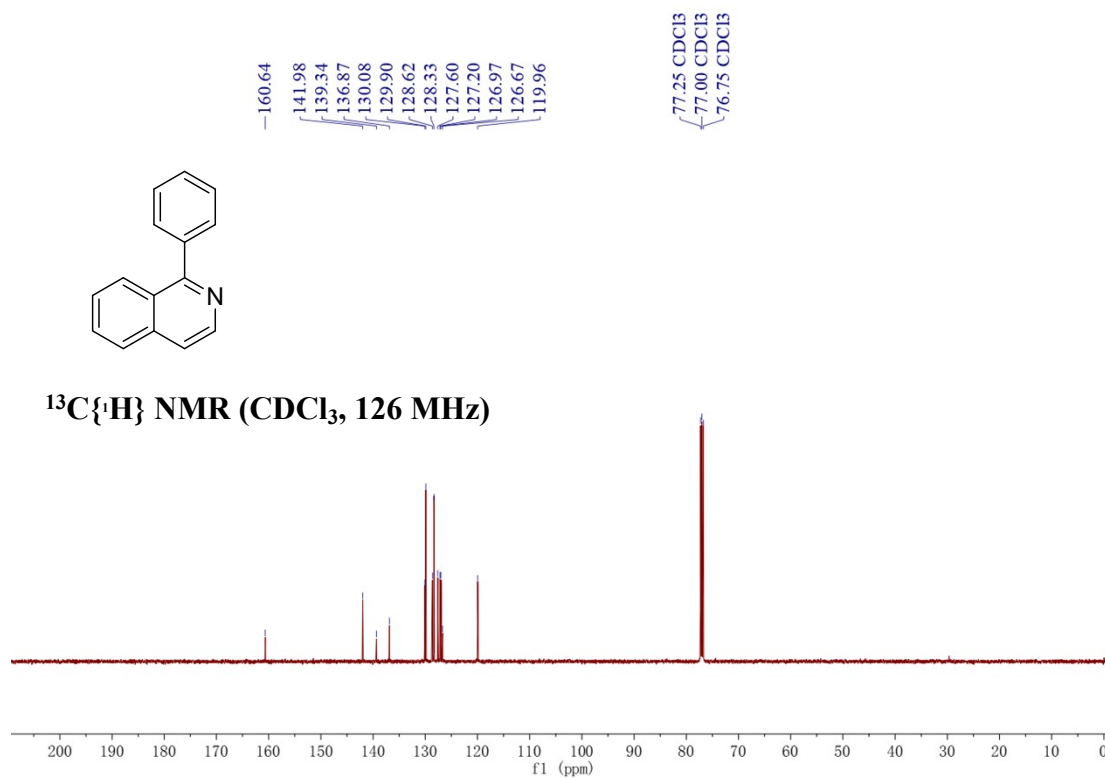

## $^1\text{H}$ NMR Spectrum of Compound a2

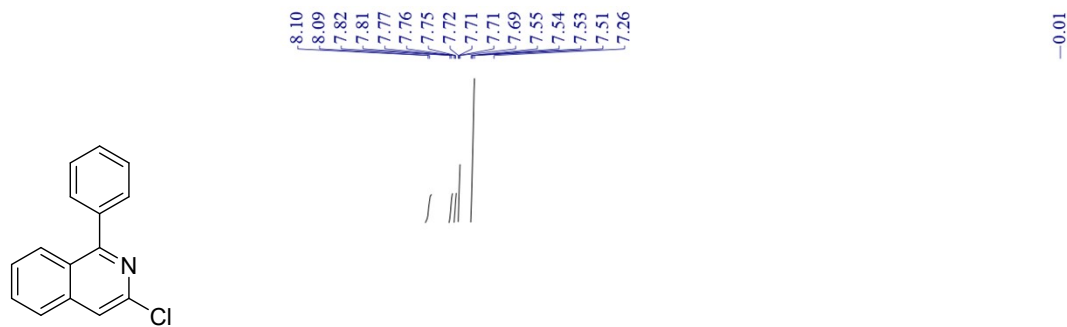

$^1\text{H}$  NMR (CDCl<sub>3</sub>, 500 MHz)

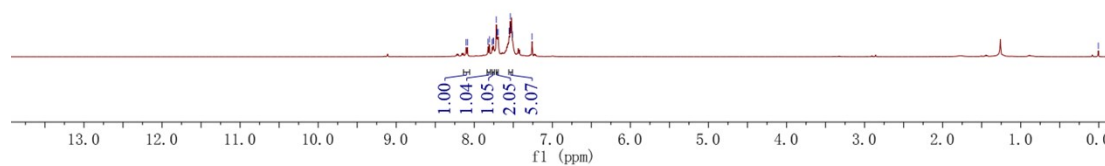

## $^{13}\text{C}\{^1\text{H}\}$ NMR Spectrum of Compound a2

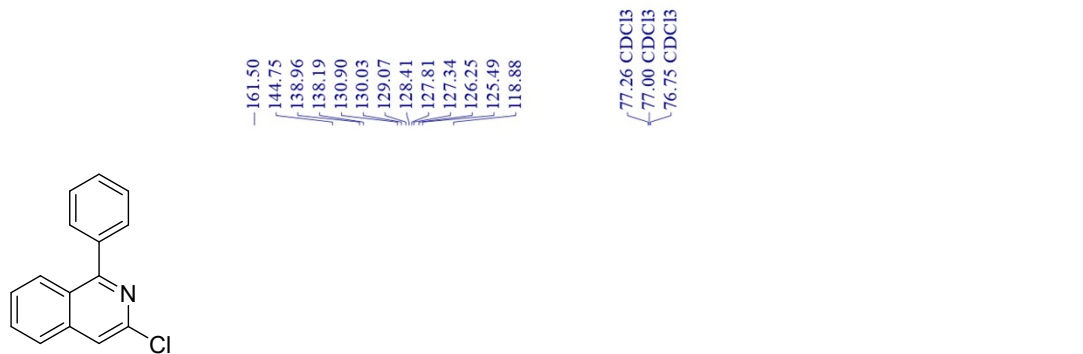

$^{13}\text{C}\{^1\text{H}\}$  NMR (CDCl<sub>3</sub>, 126 MHz)

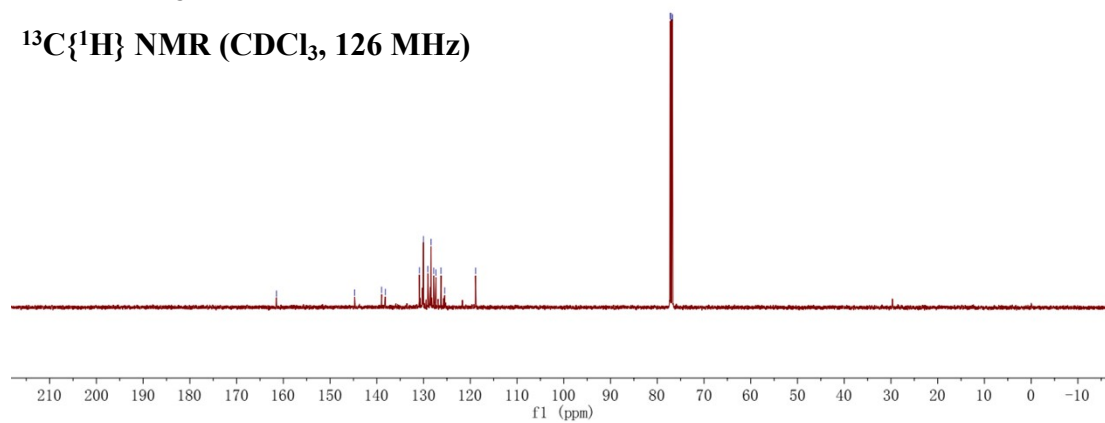

### <sup>1</sup>H NMR Spectrum of Compound a3

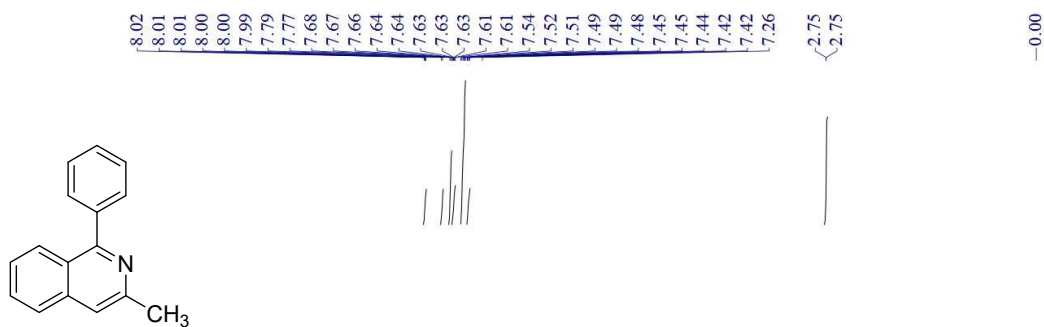

### <sup>1</sup>H NMR (CDCl<sub>3</sub>, 500 MHz)

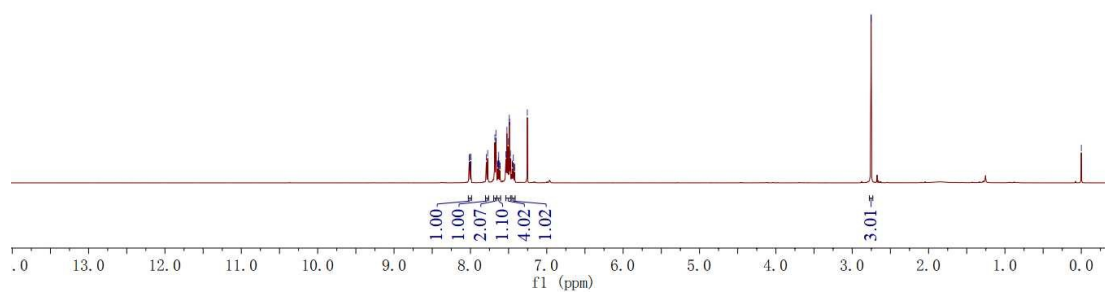

### <sup>13</sup>C{<sup>1</sup>H} NMR Spectrum of Compound a3

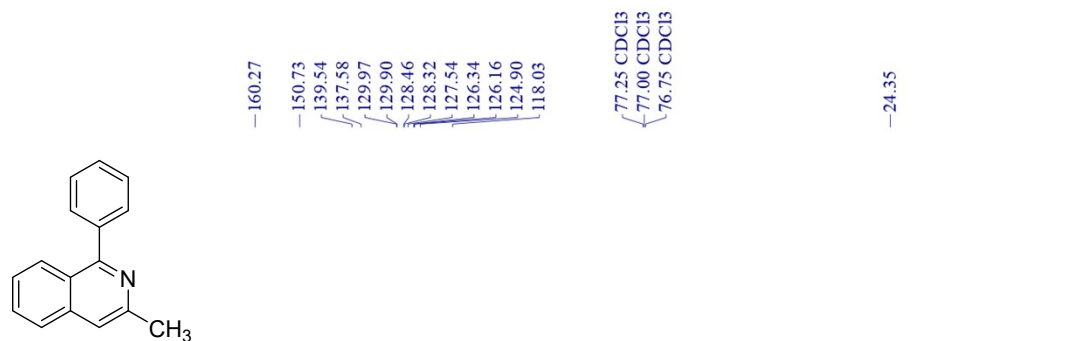

### <sup>13</sup>C{<sup>1</sup>H} NMR (CDCl<sub>3</sub>, 126 MHz)

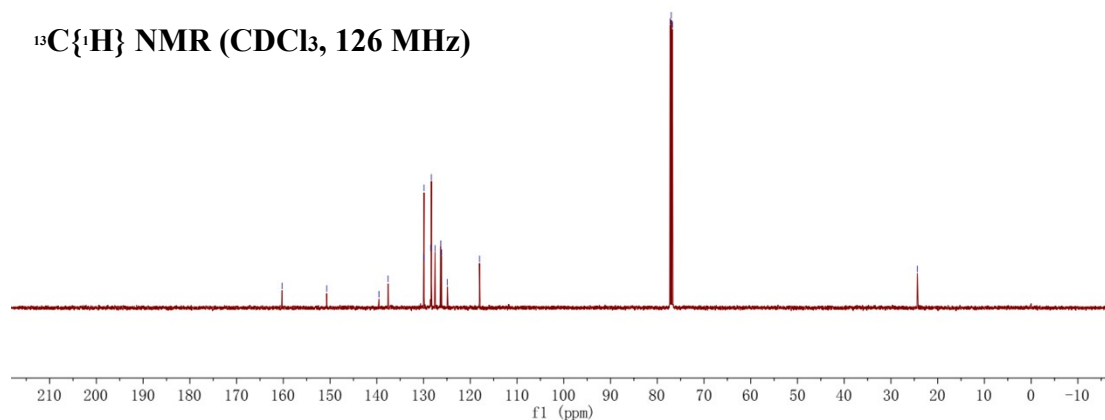

### $^1\text{H}$ NMR Spectrum of Compound a4

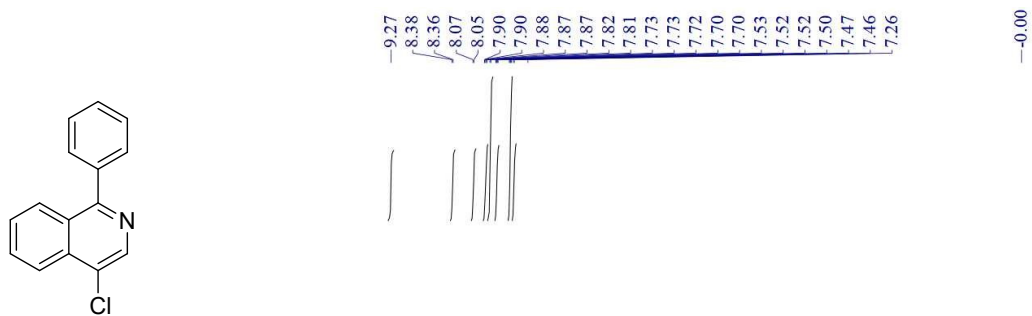

### $^1\text{H}$ NMR (CDCl<sub>3</sub>, 500 MHz)

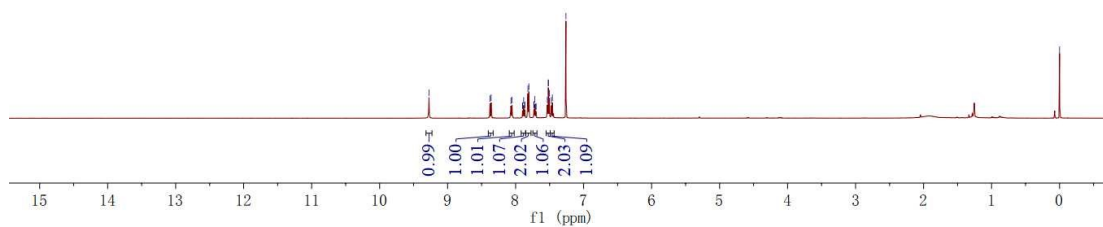

### $^{13}\text{C}\{^1\text{H}\}$ NMR Spectrum of Compound a4

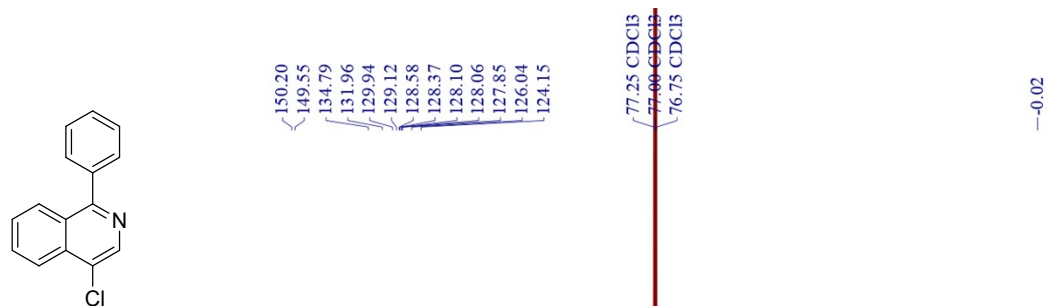

### $^{13}\text{C}\{^1\text{H}\}$ NMR (CDCl<sub>3</sub>, 126 MHz)

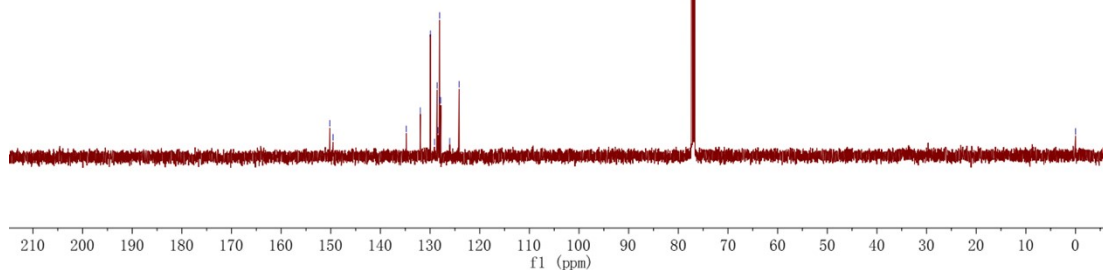

### $^1\text{H}$ NMR Spectrum of Compound a5

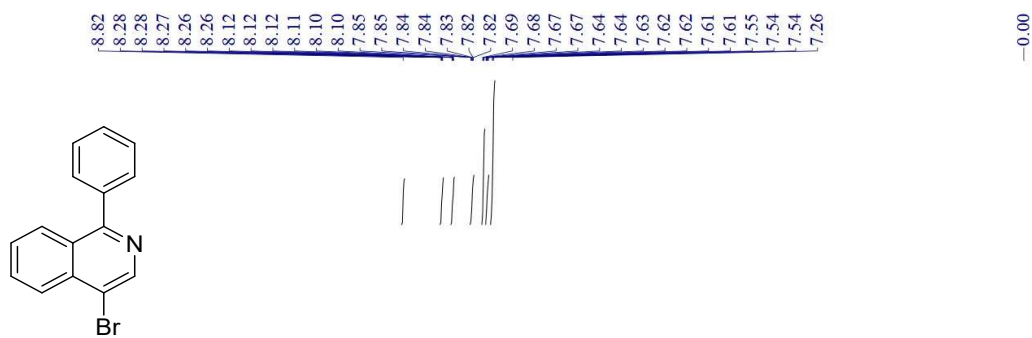

$^1\text{H}$  NMR ( $\text{CDCl}_3$ , 500 MHz)

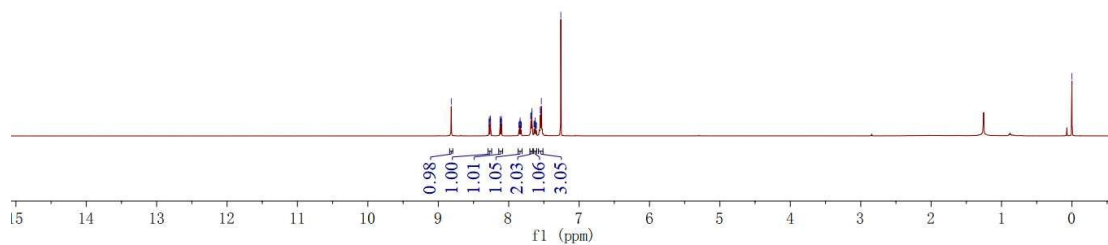

### $^{13}\text{C}\{^1\text{H}\}$ NMR Spectrum of Compound a5

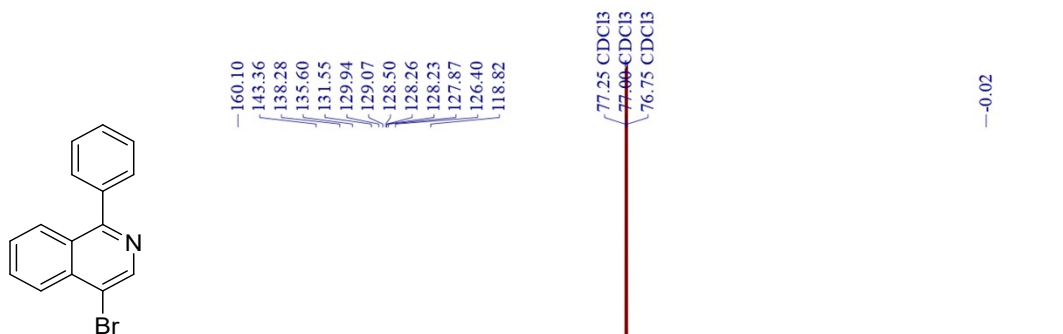

$^{13}\text{C}\{^1\text{H}\}$  NMR ( $\text{CDCl}_3$ , 126 MHz)

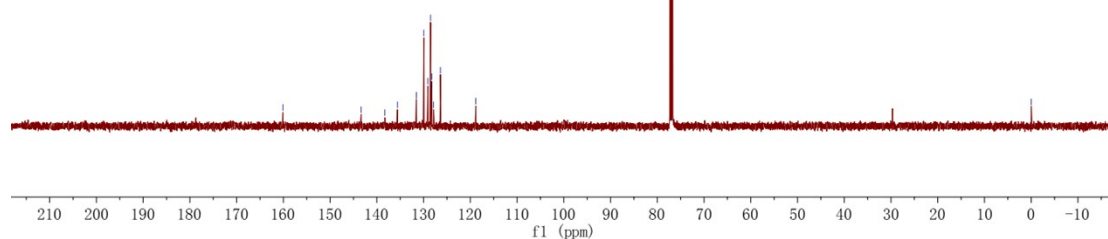

## $^1\text{H}$ NMR Spectrum of Compound a6

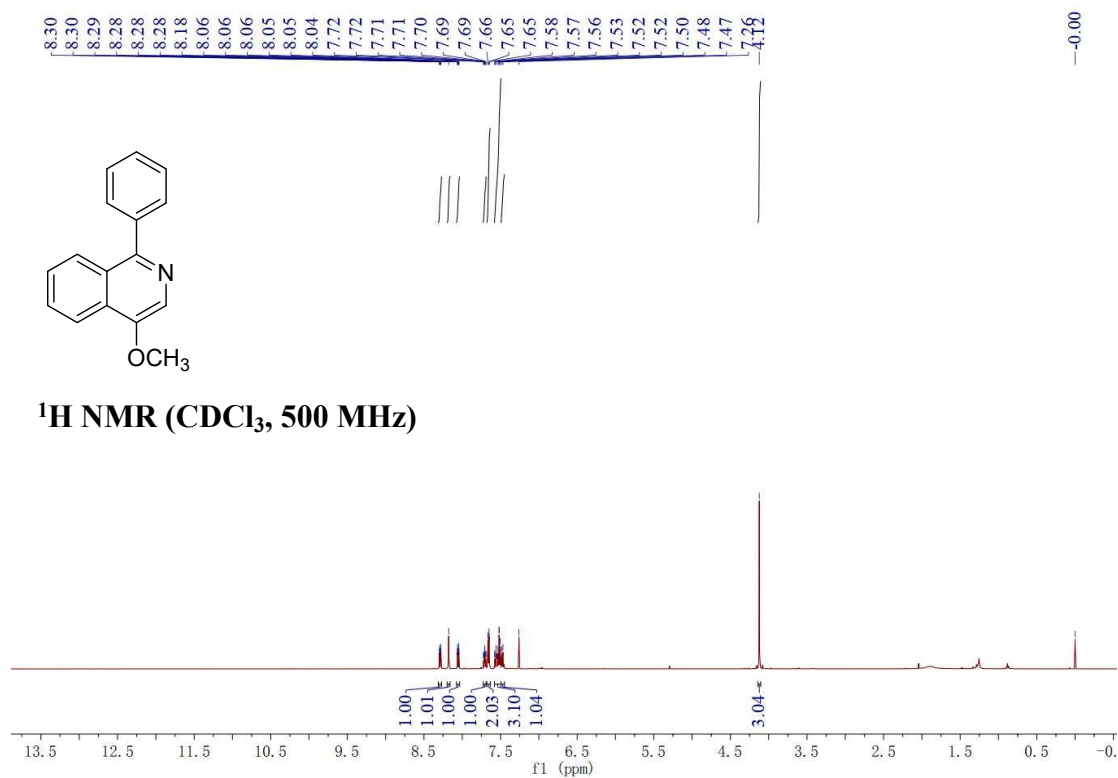

## $^{13}\text{C}\{^1\text{H}\}$ NMR Spectrum of Compound a6

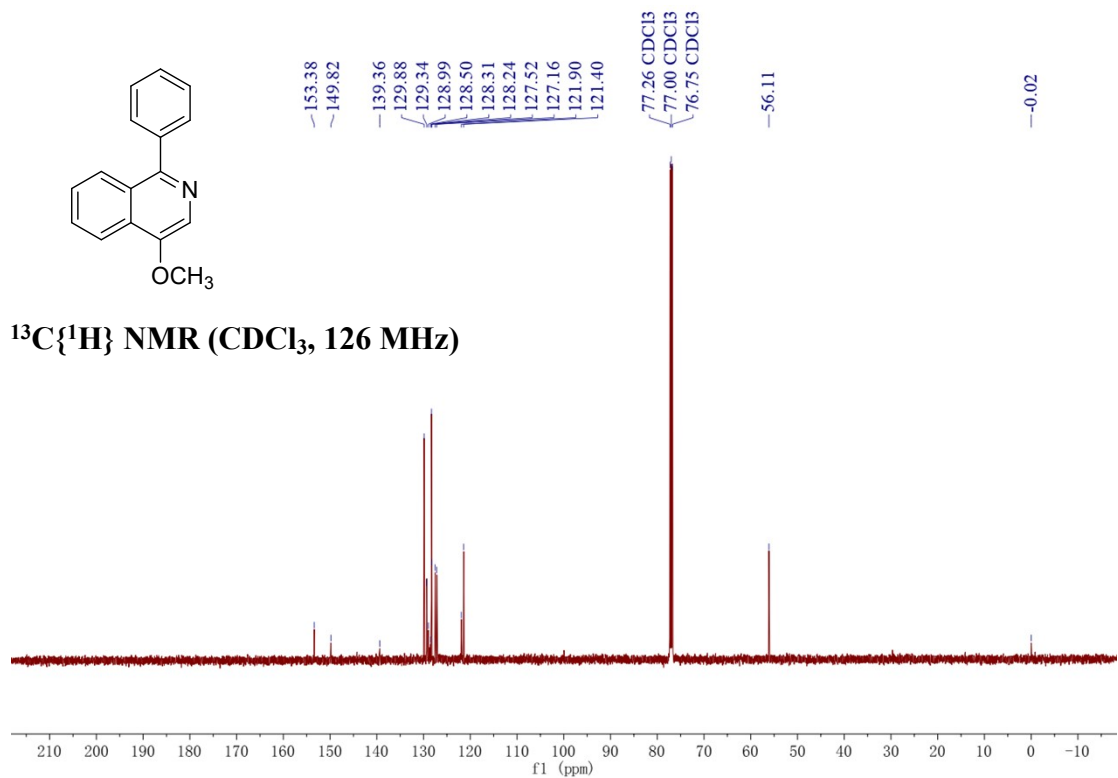

### $^1\text{H}$ NMR Spectrum of Compound a7

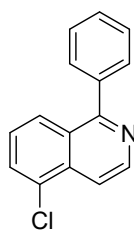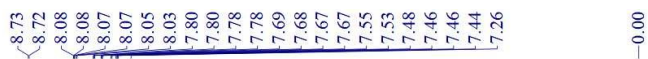

$^1\text{H}$  NMR ( $\text{CDCl}_3$ , 500 MHz)

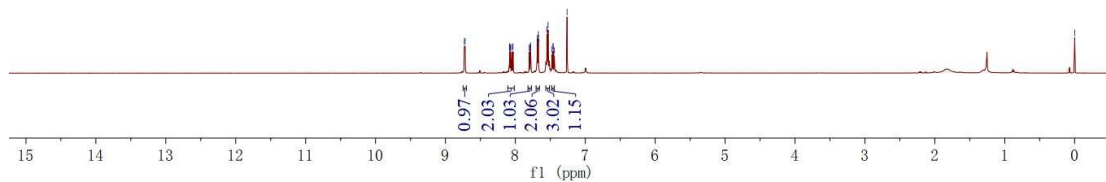

### $^{13}\text{C}\{^1\text{H}\}$ NMR Spectrum of Compound a7

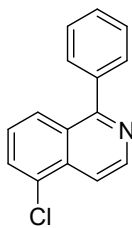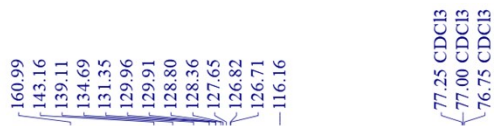

$^{13}\text{C}\{^1\text{H}\}$  NMR ( $\text{CDCl}_3$ , 126 MHz)

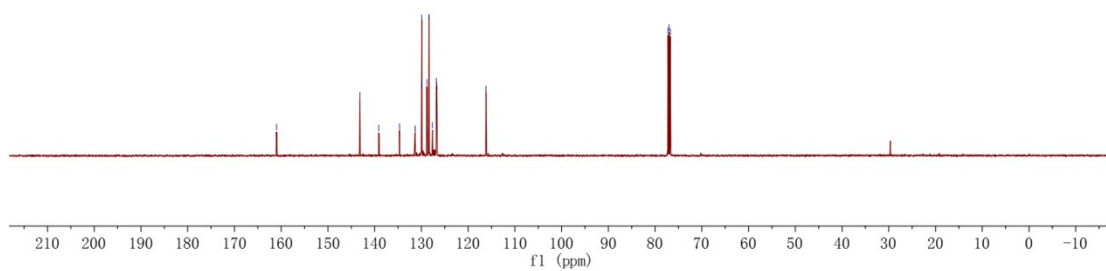

# <sup>1</sup>H NMR Spectrum of Compound a8

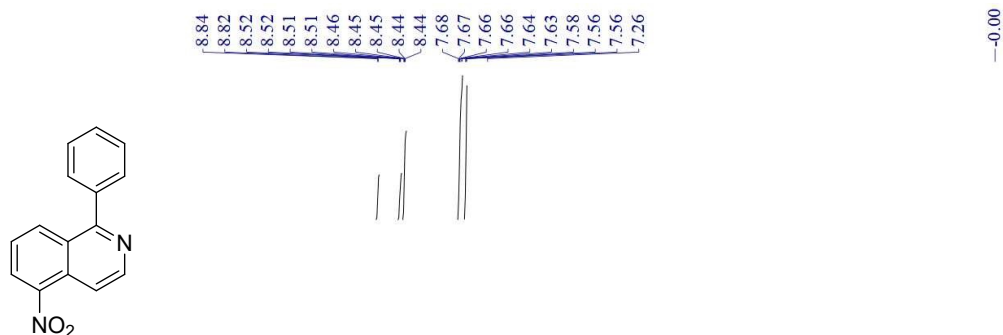

<sup>1</sup>H NMR (CDCl<sub>3</sub>, 500 MHz)

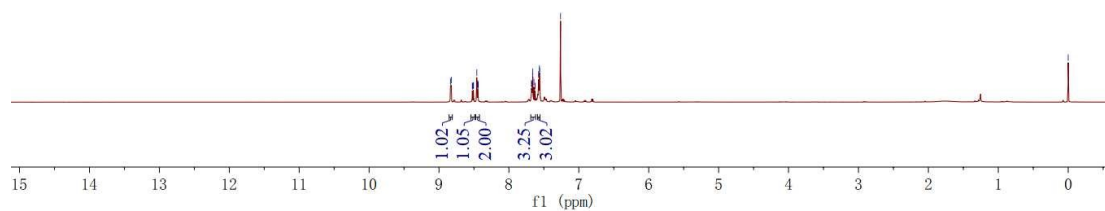

# <sup>13</sup>C{<sup>1</sup>H} NMR Spectrum of Compound a8

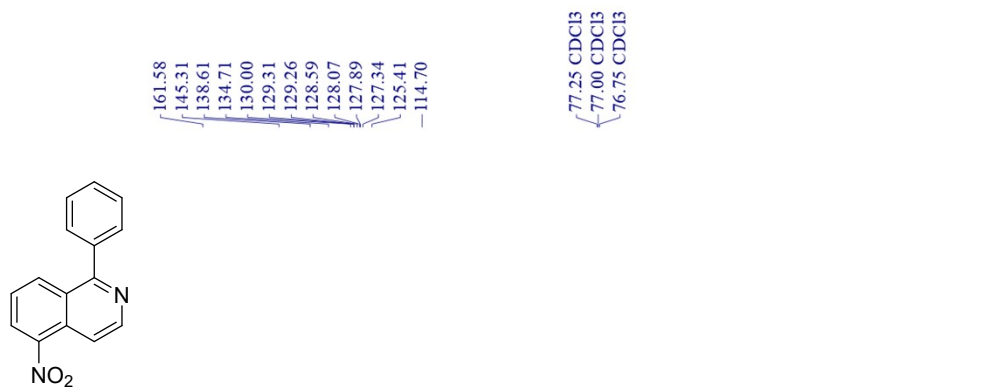

<sup>13</sup>C{<sup>1</sup>H} NMR (CDCl<sub>3</sub>, 126 MHz)

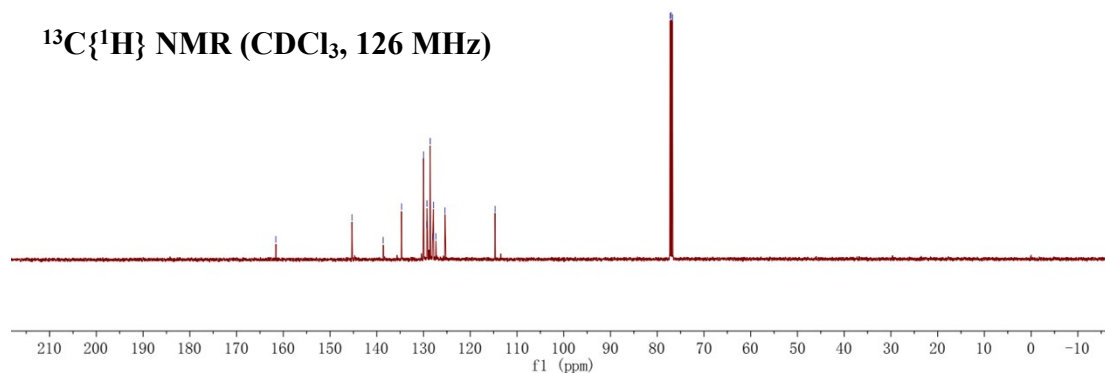



# <sup>1</sup>H NMR Spectrum of Compound a9

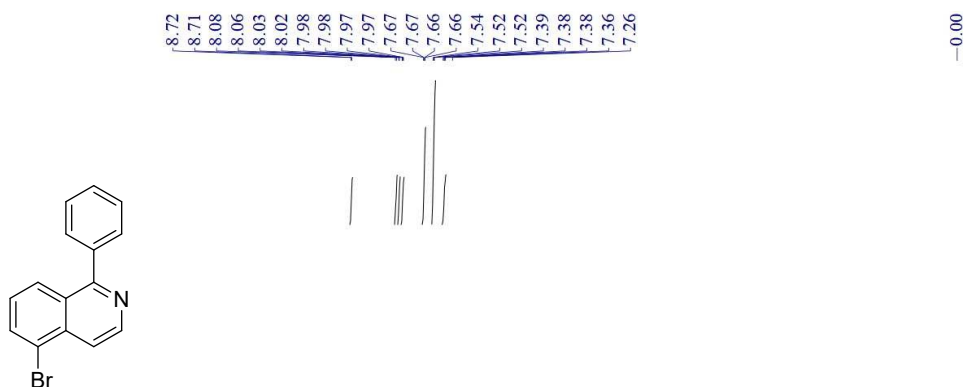

## <sup>1</sup>H NMR (CDCl<sub>3</sub>, 500 MHz)

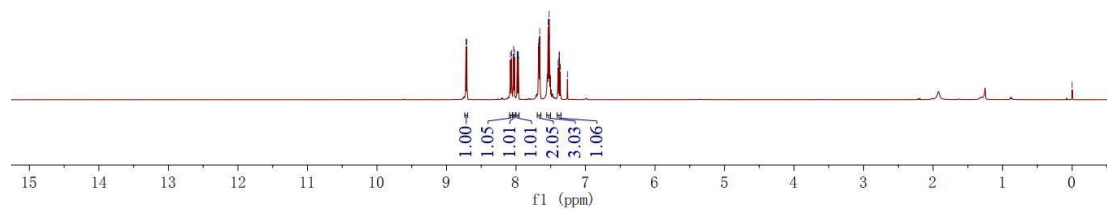

# <sup>13</sup>C{<sup>1</sup>H} NMR Spectrum of Compound a9

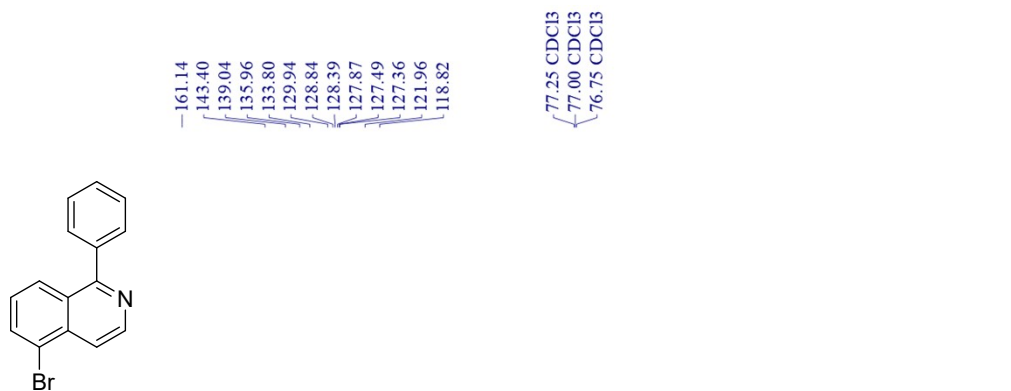

## <sup>13</sup>C{<sup>1</sup>H} NMR (CDCl<sub>3</sub>, 126 MHz)

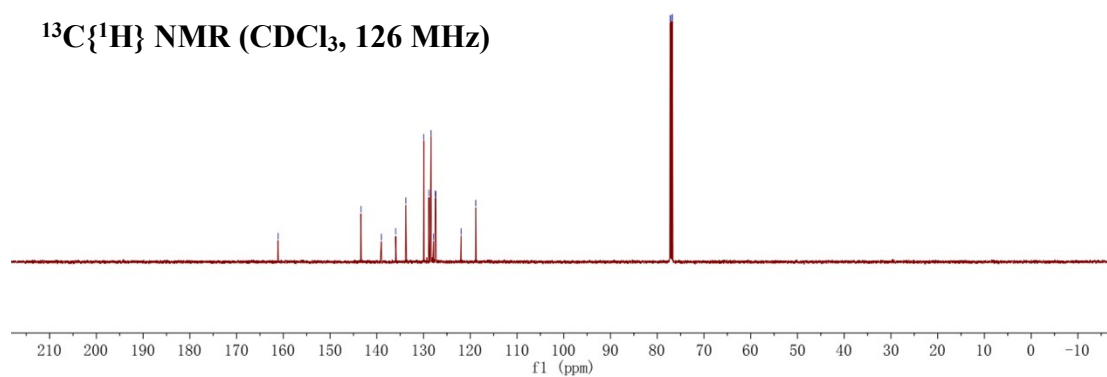

# <sup>1</sup>H NMR Spectrum of Compound a10

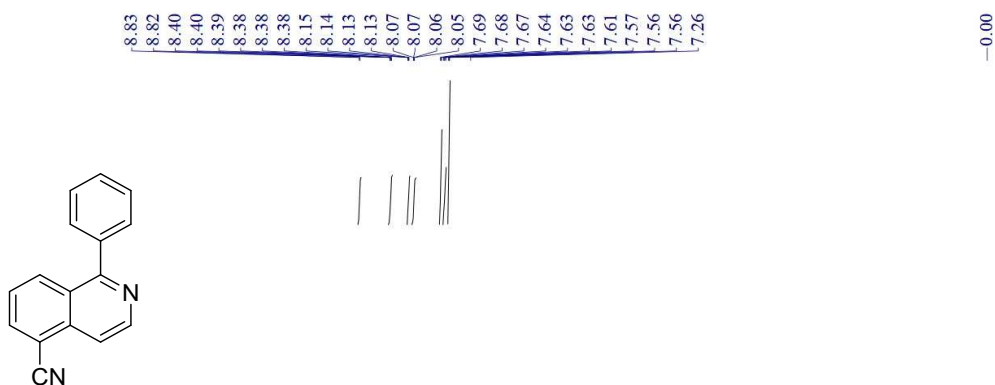

<sup>1</sup>H NMR (CDCl<sub>3</sub>, 500 MHz)

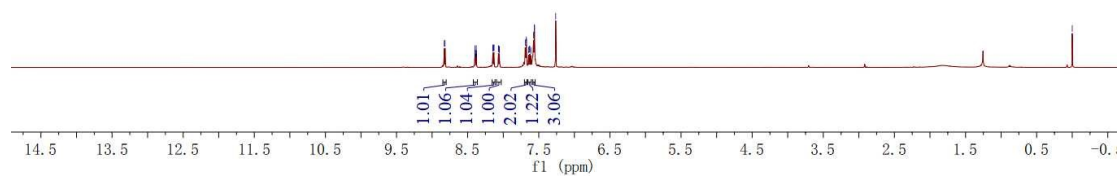

# <sup>13</sup>C{<sup>1</sup>H} NMR Spectrum of Compound a10

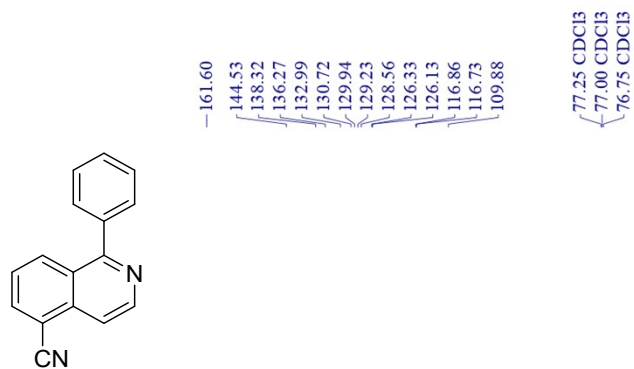

<sup>13</sup>C{<sup>1</sup>H} NMR (CDCl<sub>3</sub>, 126 MHz)

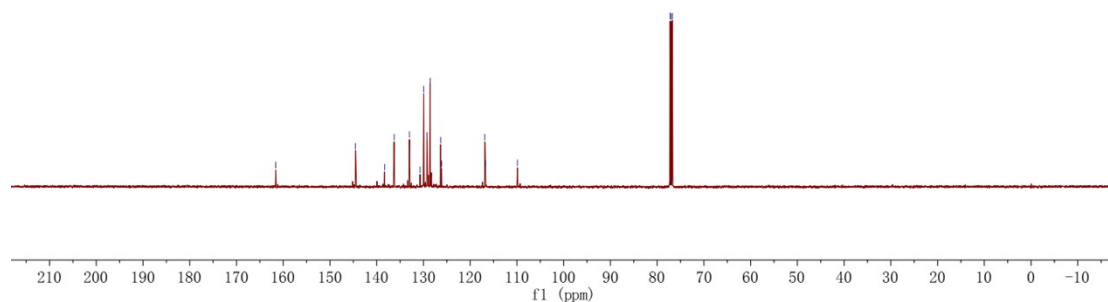

# <sup>1</sup>H NMR Spectrum of Compound a11

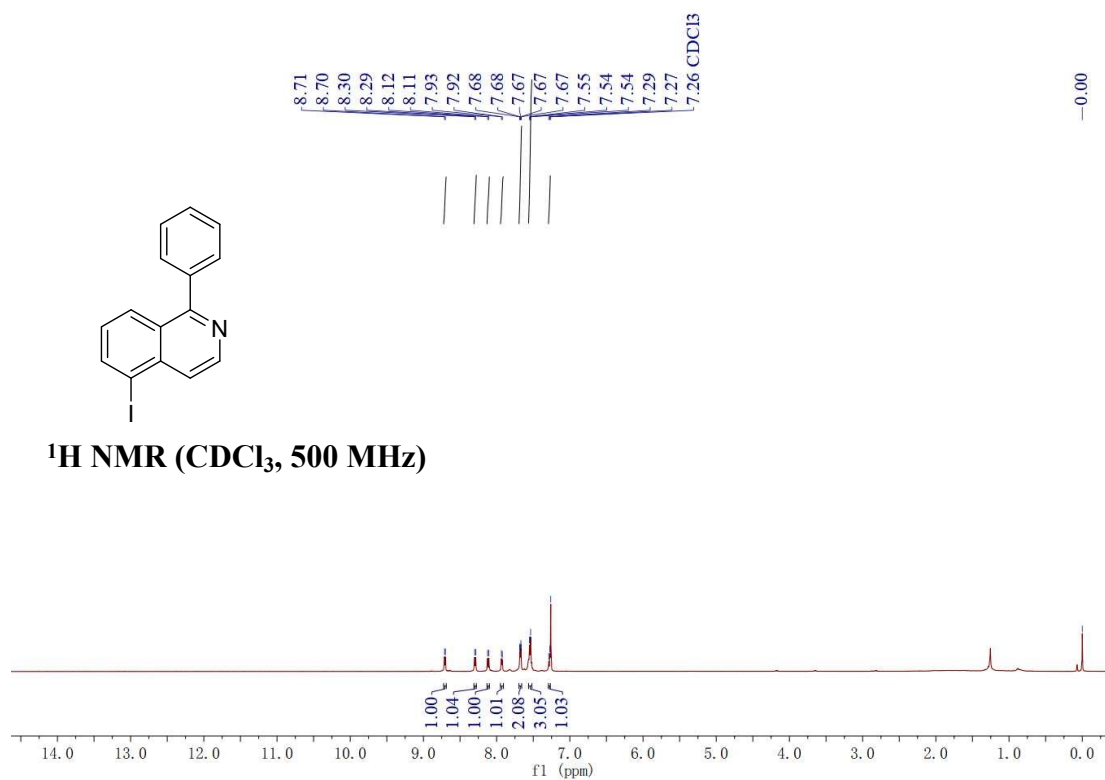

# <sup>13</sup>C{<sup>1</sup>H} NMR Spectrum of Compound a11

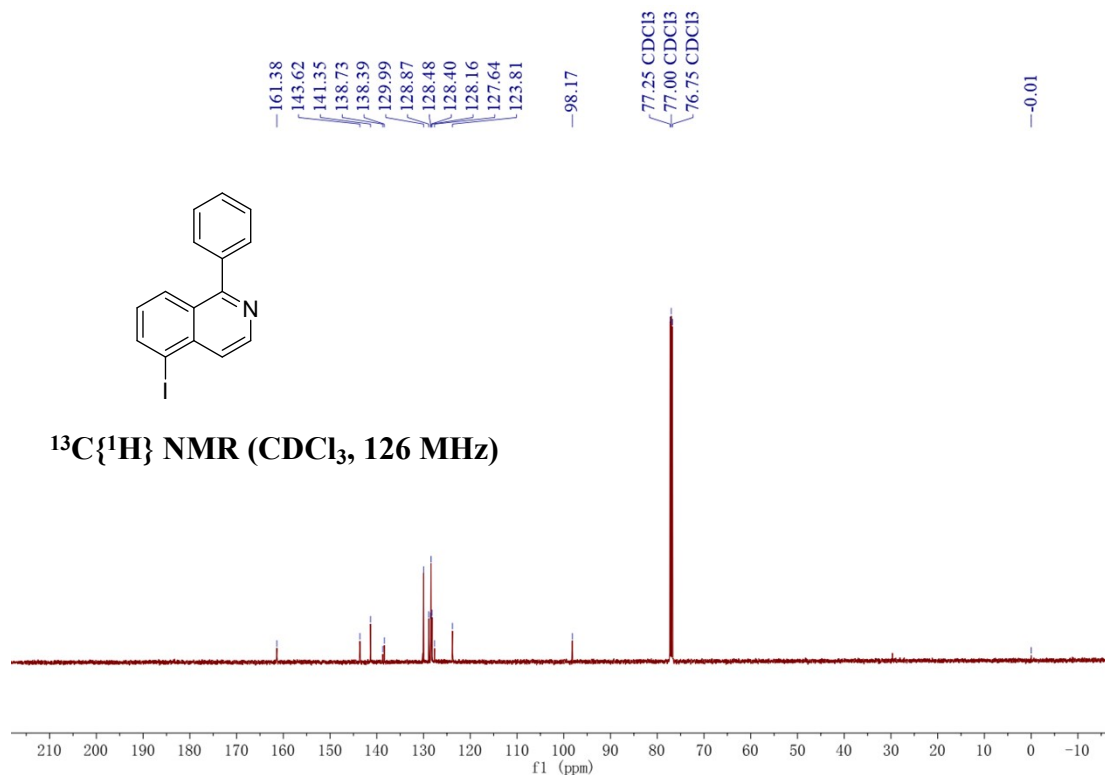

## $^1\text{H}$ NMR Spectrum of Compound a12

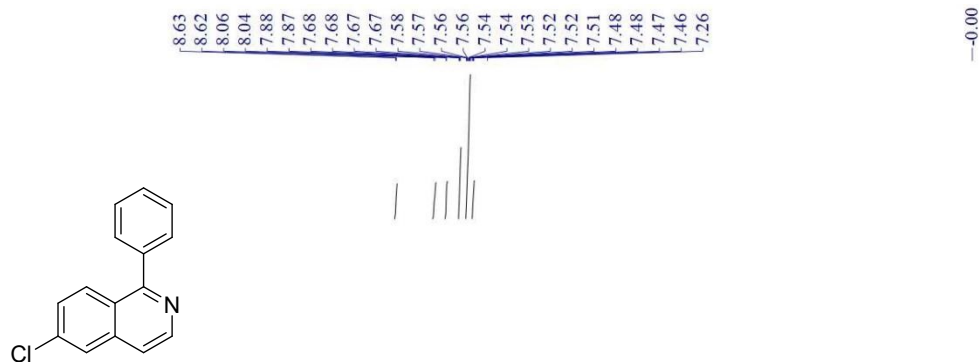

$^1\text{H}$  NMR (CDCl<sub>3</sub>, 500 MHz)

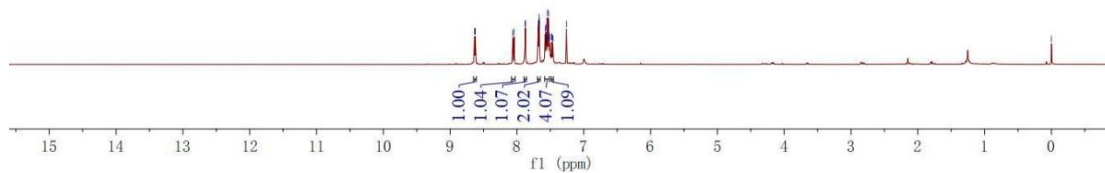

## $^{13}\text{C}\{^1\text{H}\}$ NMR Spectrum of Compound a12

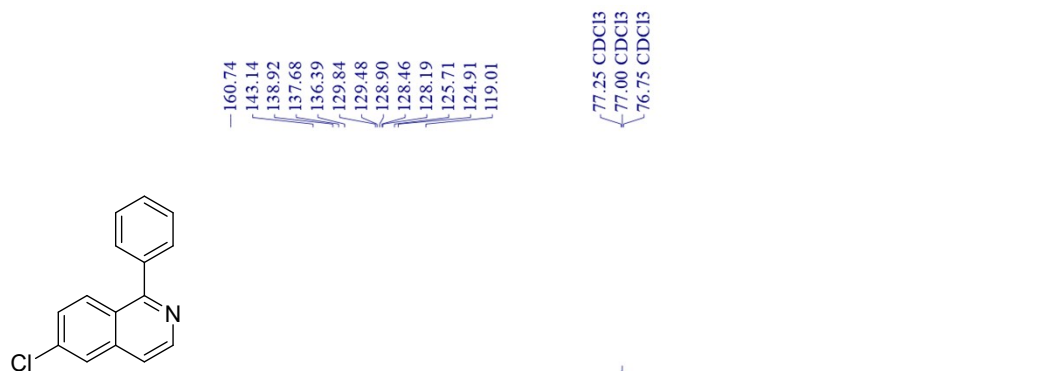

$^{13}\text{C}\{^1\text{H}\}$  NMR (CDCl<sub>3</sub>, 126 MHz)

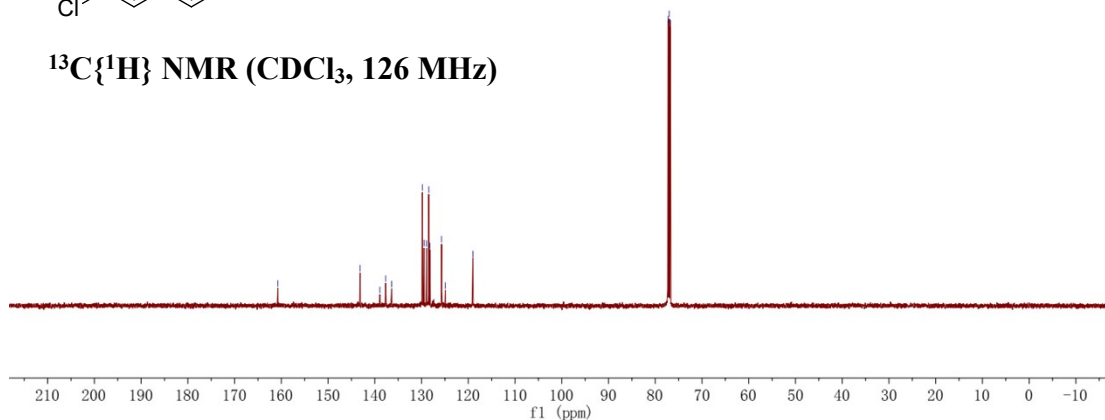

### <sup>1</sup>H NMR Spectrum of Compound a13

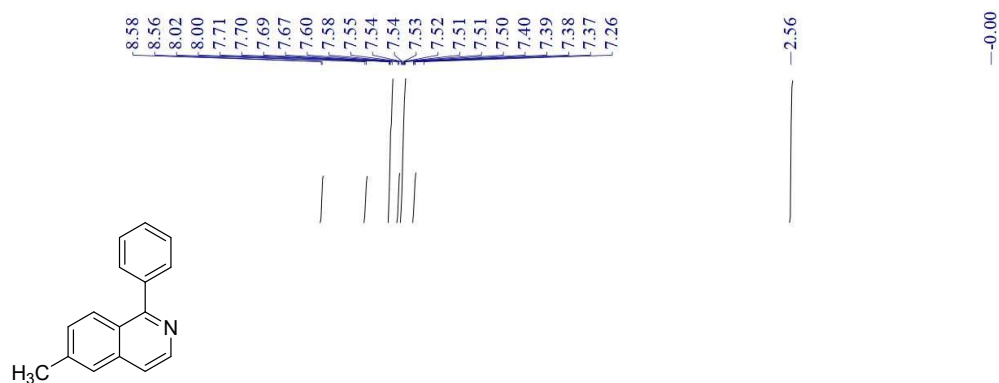

### <sup>1</sup>H NMR (CDCl<sub>3</sub>, 500 MHz)

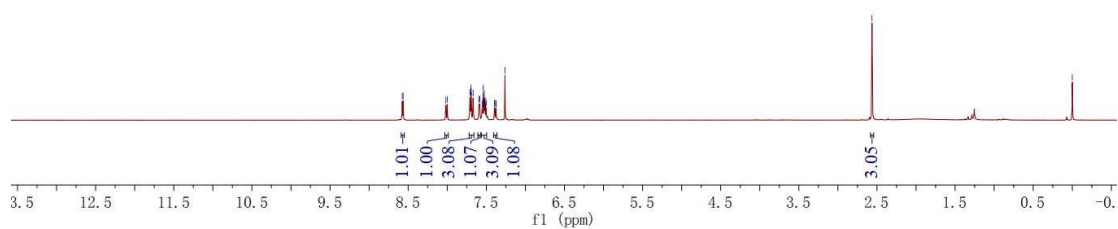

### <sup>13</sup>C{<sup>1</sup>H} NMR Spectrum of Compound a13

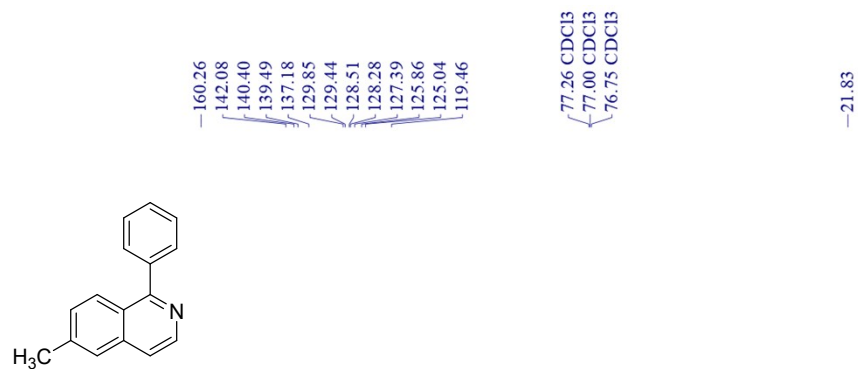

### <sup>13</sup>C{<sup>1</sup>H} NMR (CDCl<sub>3</sub>, 126 MHz)

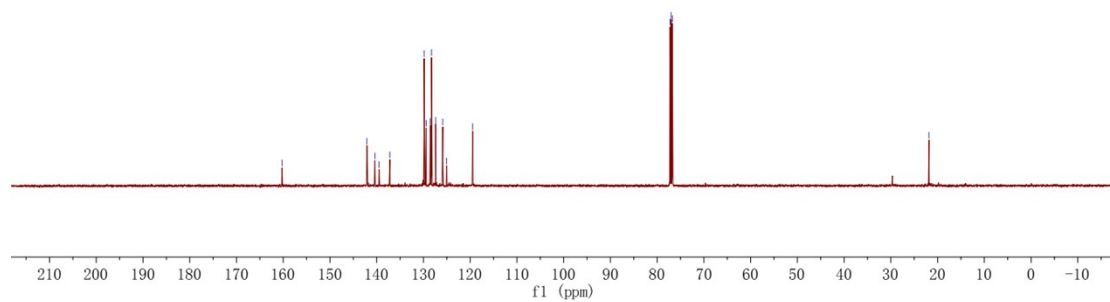

# <sup>1</sup>H NMR Spectrum of Compound a14

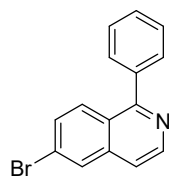

<sup>1</sup>H NMR (CDCl<sub>3</sub>, 500 MHz)

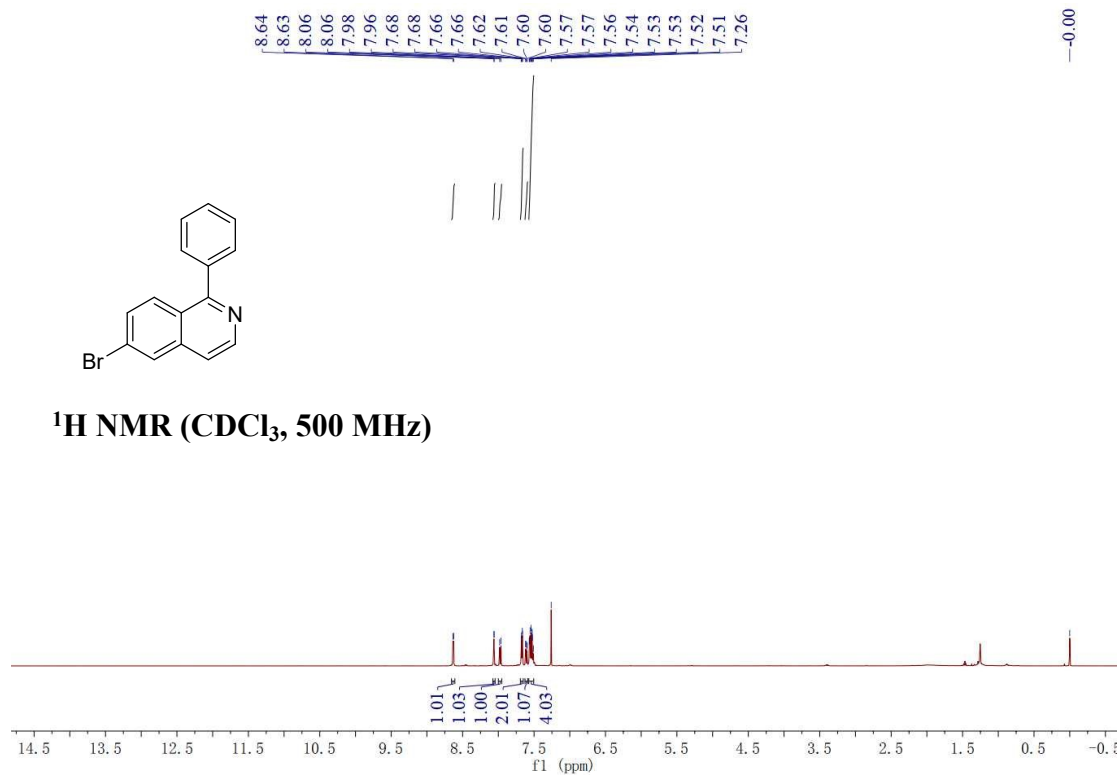

# <sup>13</sup>C{<sup>1</sup>H} NMR Spectrum of Compound a14

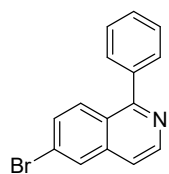

<sup>13</sup>C{<sup>1</sup>H} NMR (CDCl<sub>3</sub>, 126 MHz)

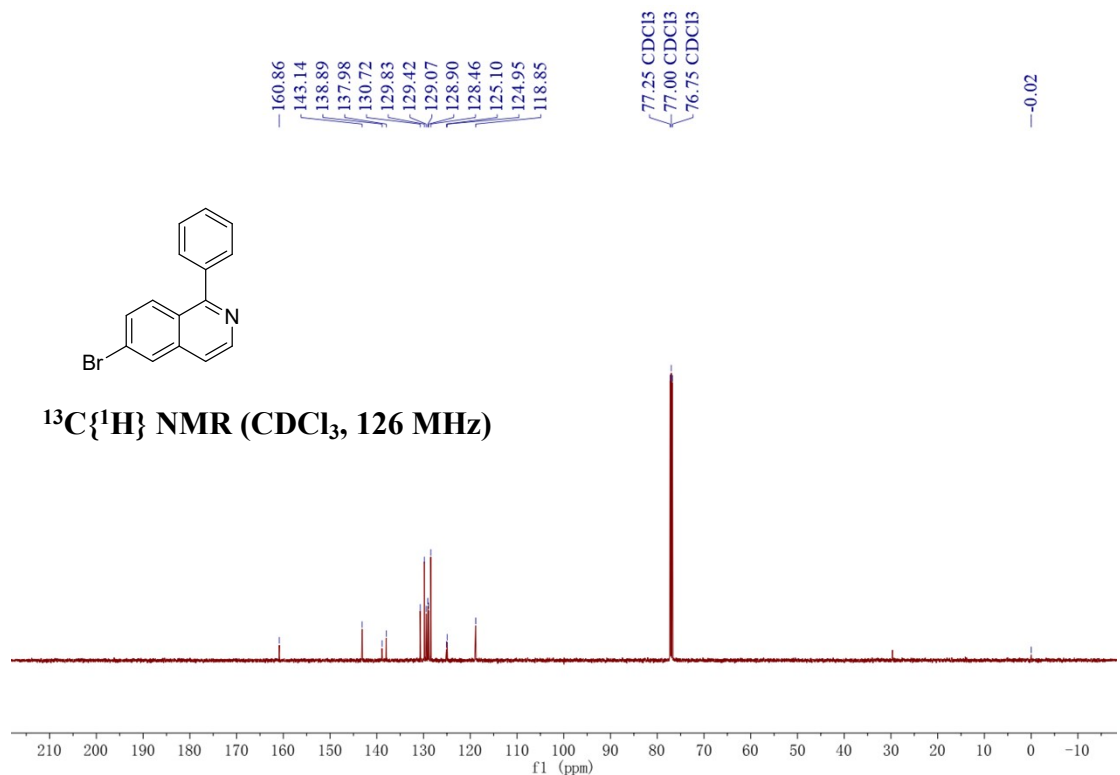

## $^1\text{H}$ NMR Spectrum of Compound a15

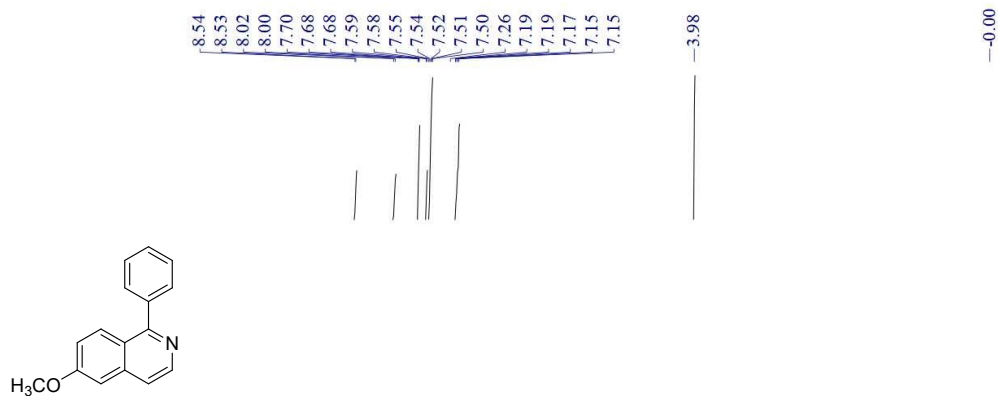

## $^1\text{H}$ NMR (CDCl<sub>3</sub>, 500 MHz)

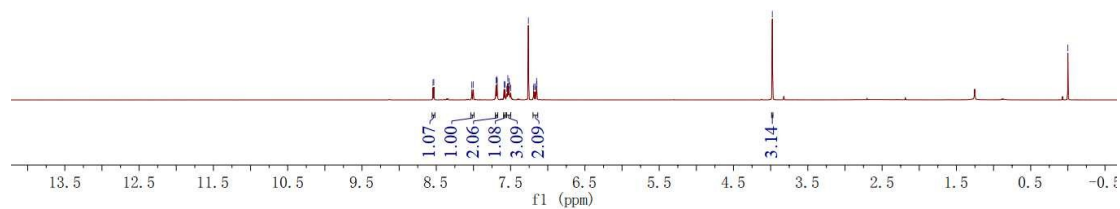

## $^{13}\text{C}\{^1\text{H}\}$ NMR Spectrum of Compound a15

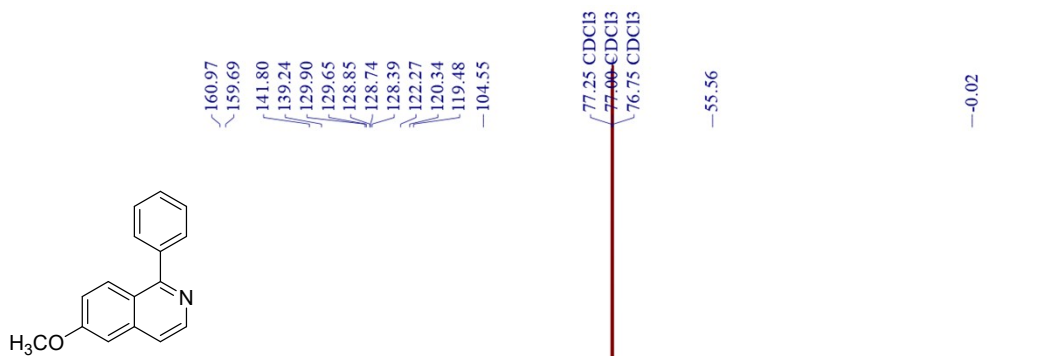

## $^{13}\text{C}\{^1\text{H}\}$ NMR (CDCl<sub>3</sub>, 126 MHz)

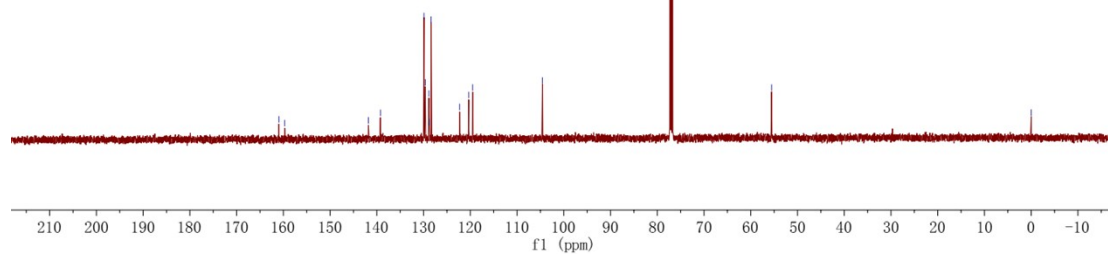

## $^1\text{H}$ NMR Spectrum of Compound a16

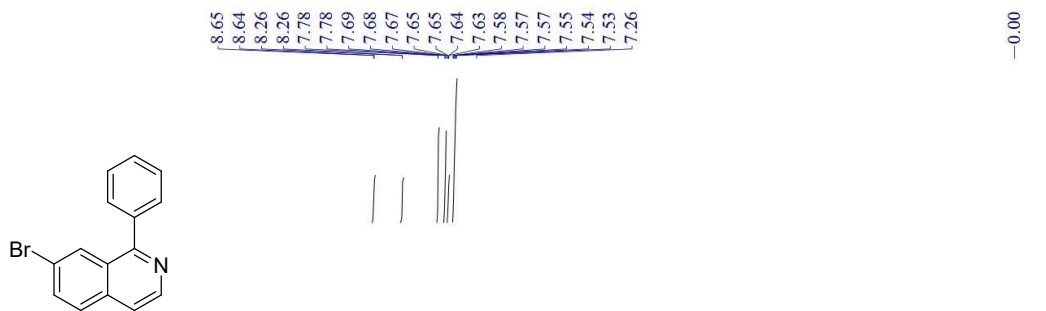

$^1\text{H}$  NMR ( $\text{CDCl}_3$ , 500 MHz)

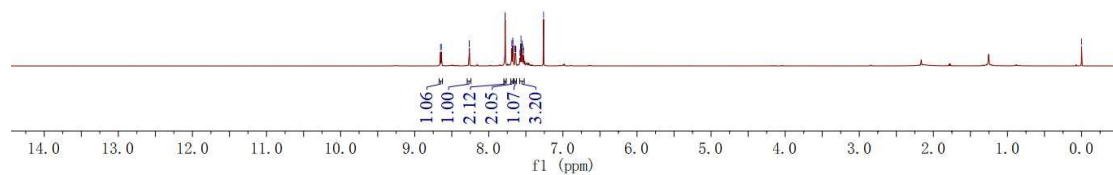

## $^{13}\text{C}\{^1\text{H}\}$ NMR Spectrum of Compound a16

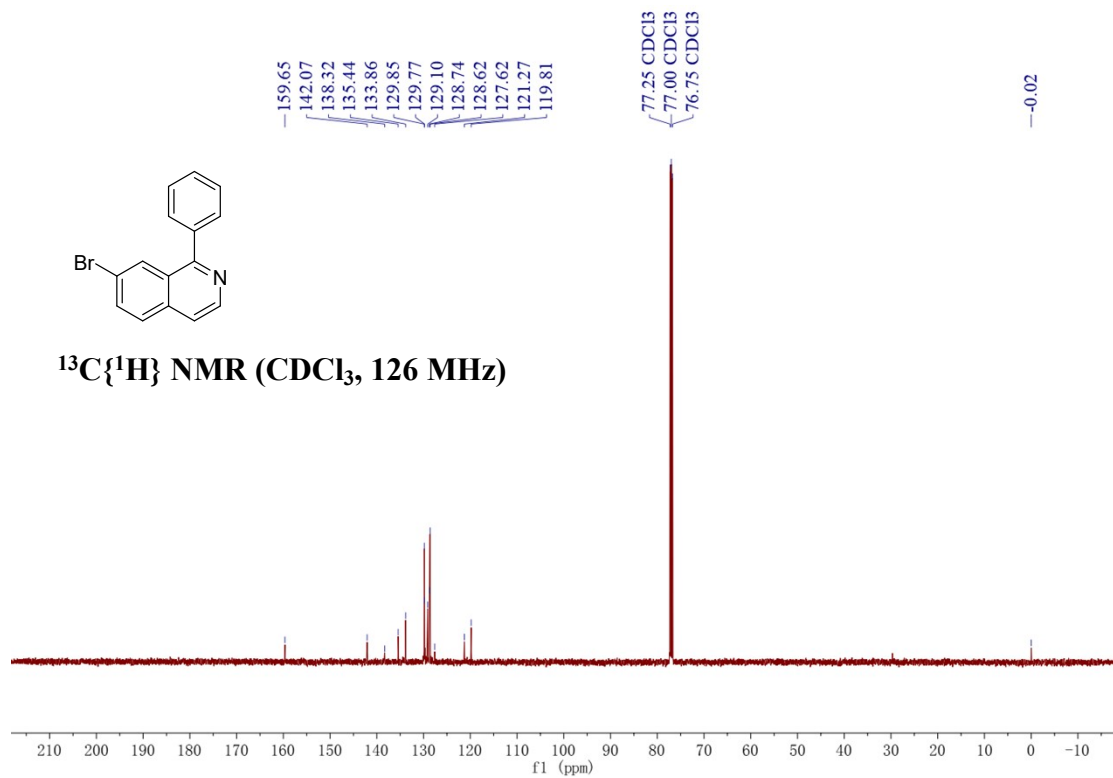

$^{13}\text{C}\{^1\text{H}\}$  NMR ( $\text{CDCl}_3$ , 126 MHz)



# <sup>1</sup>H NMR Spectrum of Compound a17

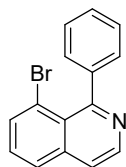

<sup>1</sup>H NMR (CDCl<sub>3</sub>, 500 MHz)

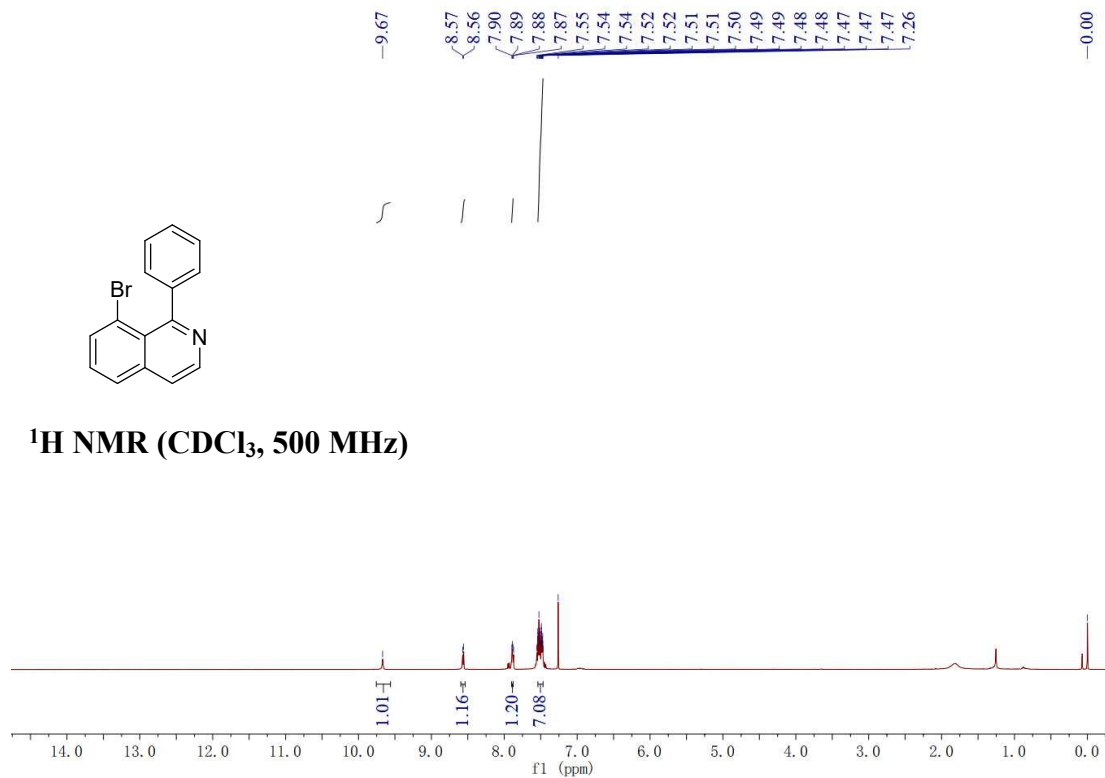

# <sup>13</sup>C{<sup>1</sup>H} NMR Spectrum of Compound a17

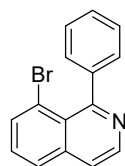

<sup>13</sup>C{<sup>1</sup>H} NMR (CDCl<sub>3</sub>, 126 MHz)

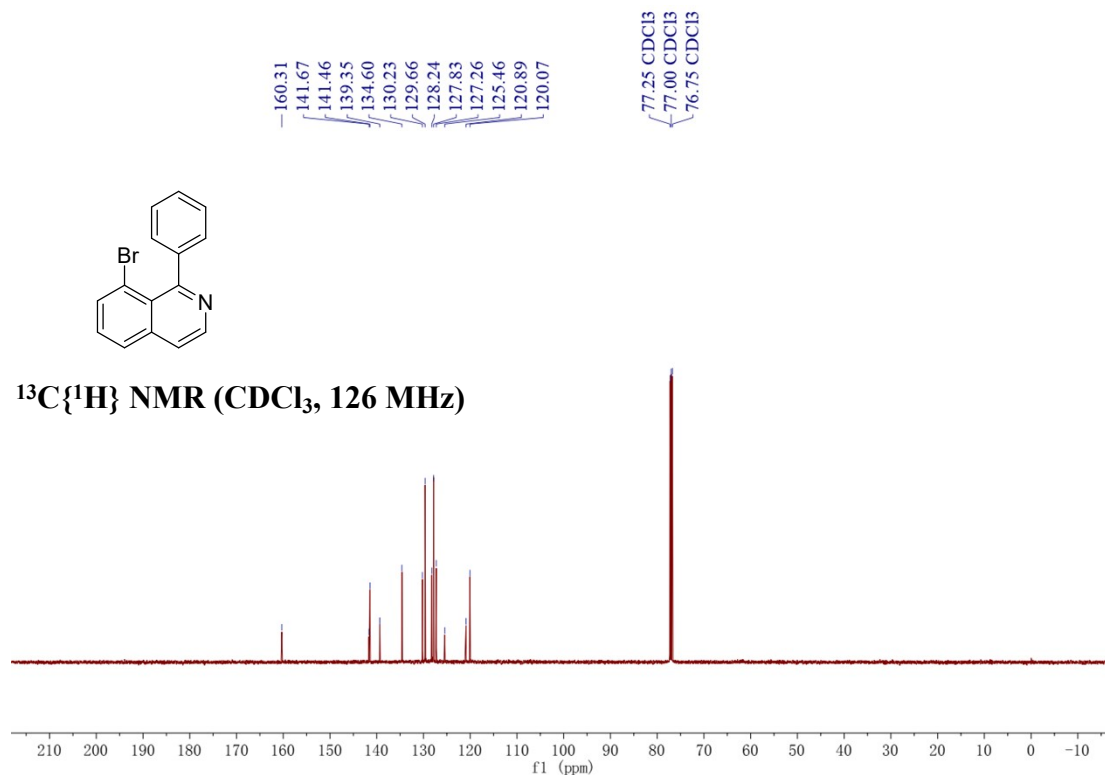

# $^1\text{H}$ NMR Spectrum of Compound b1

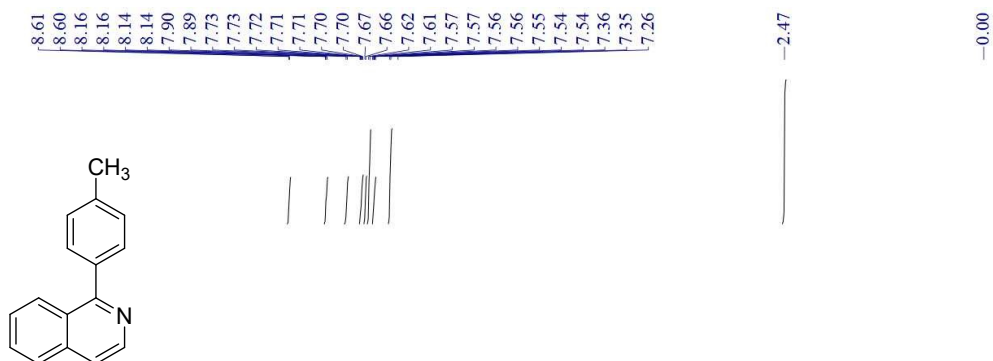

$^1\text{H}$  NMR (CDCl<sub>3</sub>, 500 MHz)

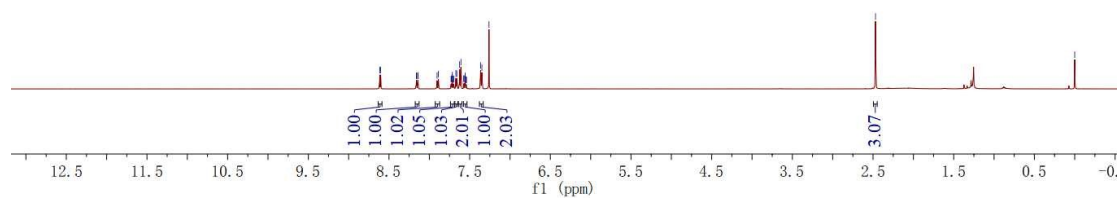

# $^{13}\text{C}\{^1\text{H}\}$ NMR Spectrum of Compound b1

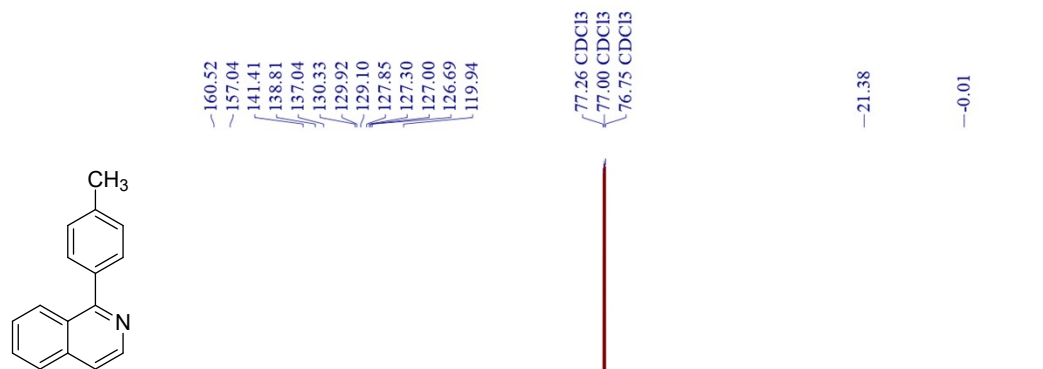

$^{13}\text{C}\{^1\text{H}\}$  NMR (CDCl<sub>3</sub>, 126 MHz)

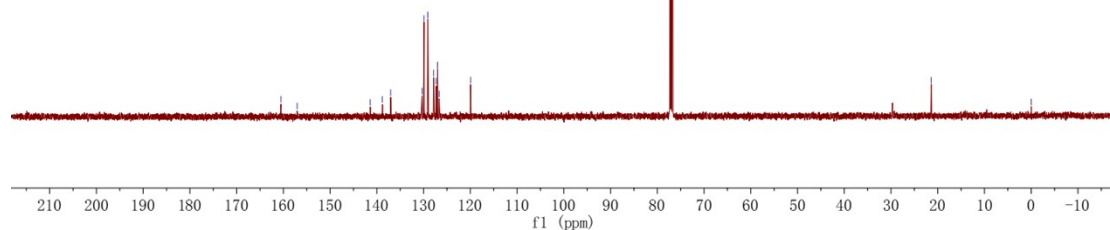

## $^1\text{H}$ NMR Spectrum of Compound b2

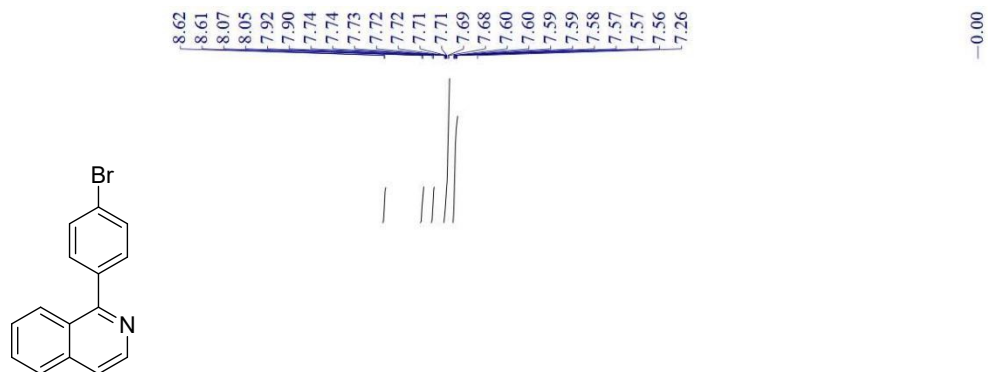

$^1\text{H}$  NMR (CDCl<sub>3</sub>, 500 MHz)

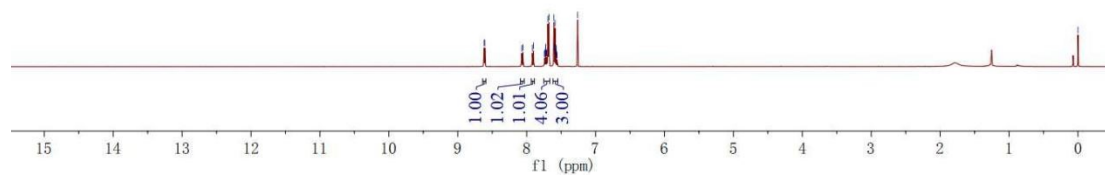

## $^{13}\text{C}\{^1\text{H}\}$ NMR Spectrum of Compound b2

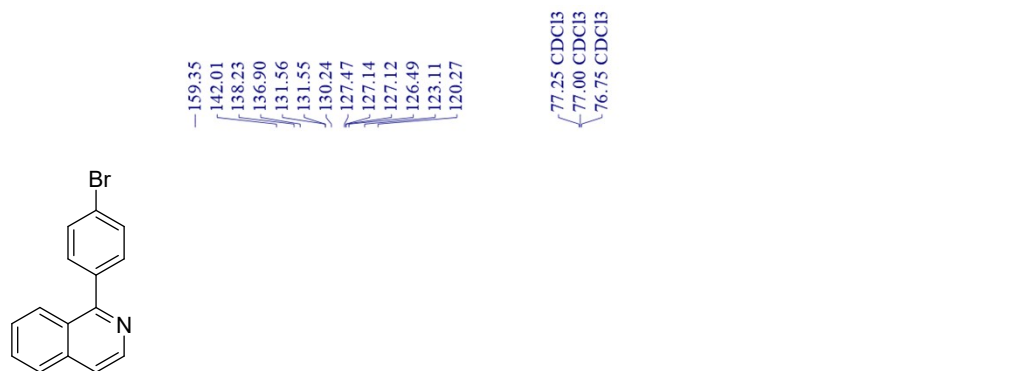

$^{13}\text{C}\{^1\text{H}\}$  NMR (CDCl<sub>3</sub>, 126 MHz)

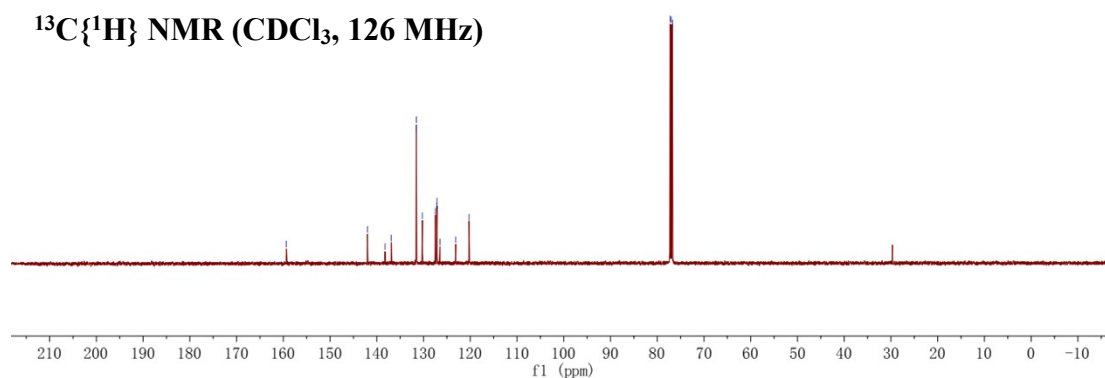

### $^1\text{H}$ NMR Spectrum of Compound b3

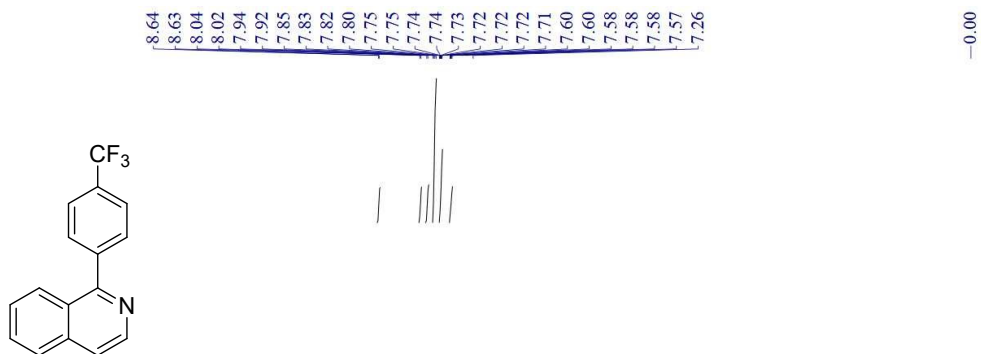

$^1\text{H}$  NMR (CDCl<sub>3</sub>, 500 MHz)

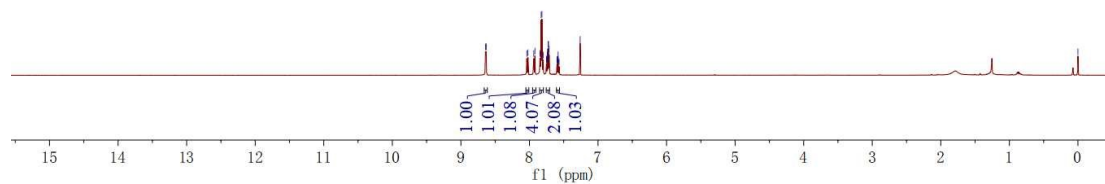

### $^{13}\text{C}\{^1\text{H}\}$ NMR Spectrum of Compound b3

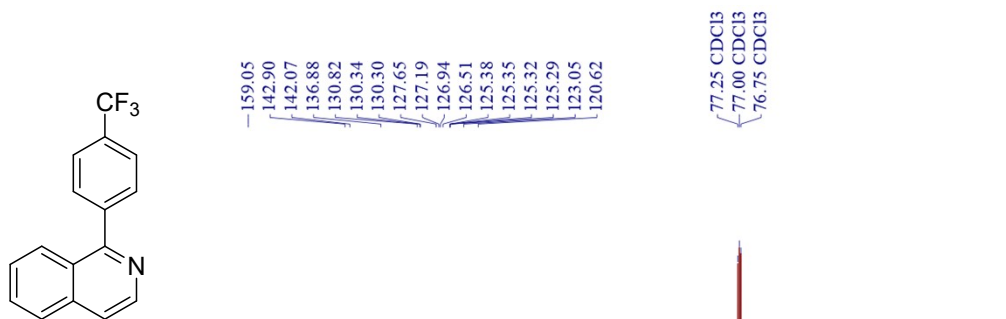

$^{13}\text{C}\{^1\text{H}\}$  NMR (CDCl<sub>3</sub>, 126 MHz)

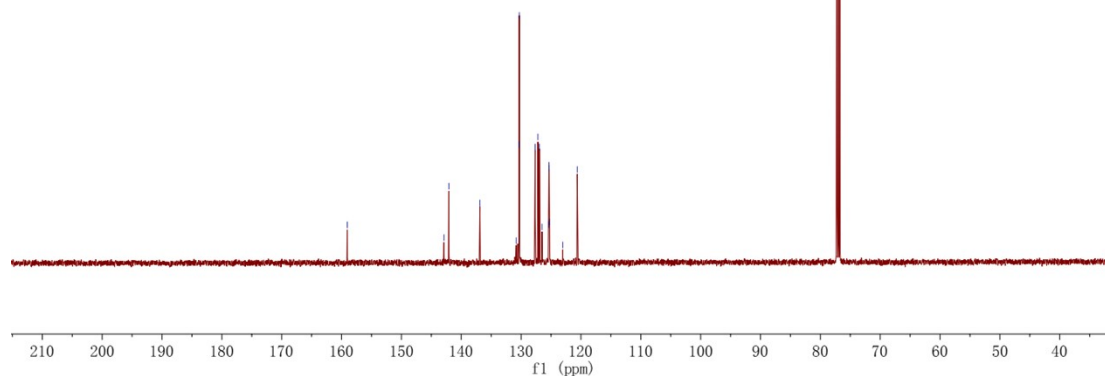

### $^{19}\text{F}\{^1\text{H}\}$ NMR Spectrum of Compound b3

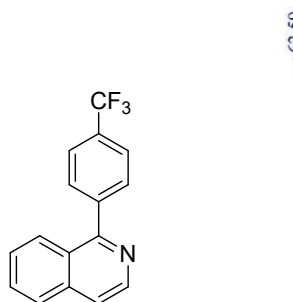

### $^{19}\text{F}\{^1\text{H}\}$ NMR ( $\text{CDCl}_3$ , 471 MHz)

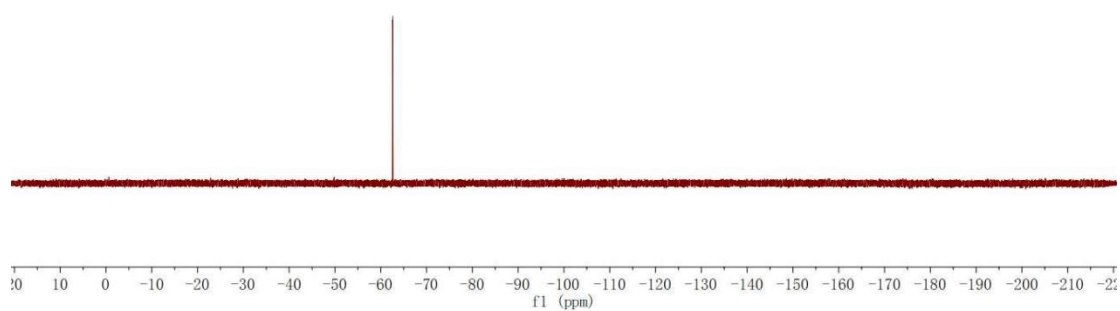

### $^1\text{H}$ NMR Spectrum of Compound b4

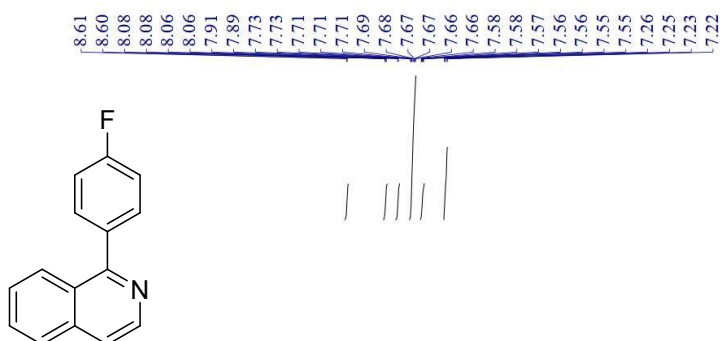

### $^1\text{H}$ NMR ( $\text{CDCl}_3$ , 500 MHz)

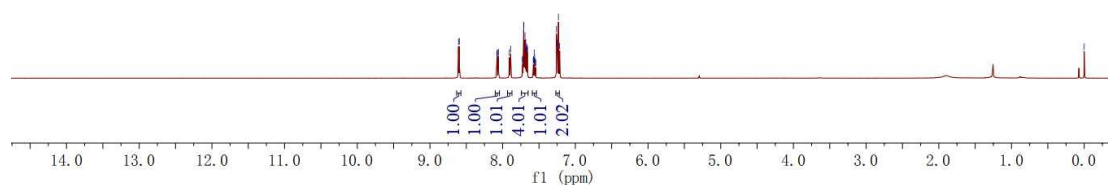

### $^{13}\text{C}\{^1\text{H}\}$ NMR Spectrum of Compound b4

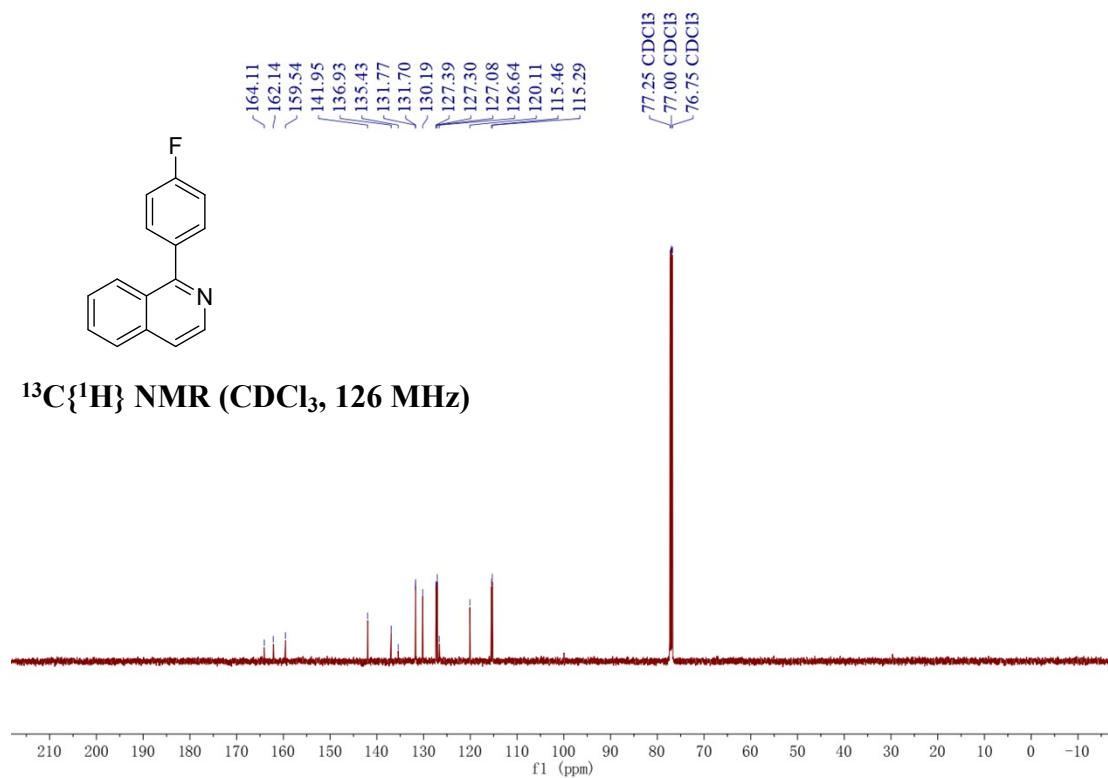

### $^{19}\text{F}\{^1\text{H}\}$ NMR Spectrum of Compound b4

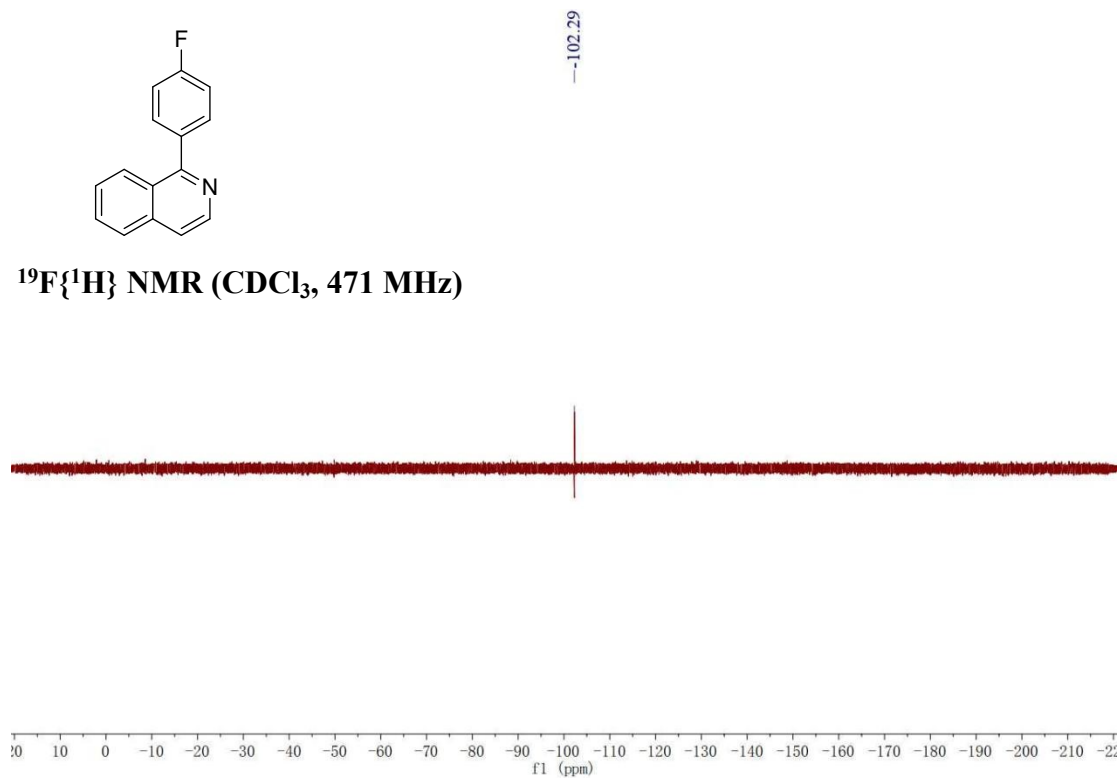

## $^1\text{H}$ NMR Spectrum of Compound b5

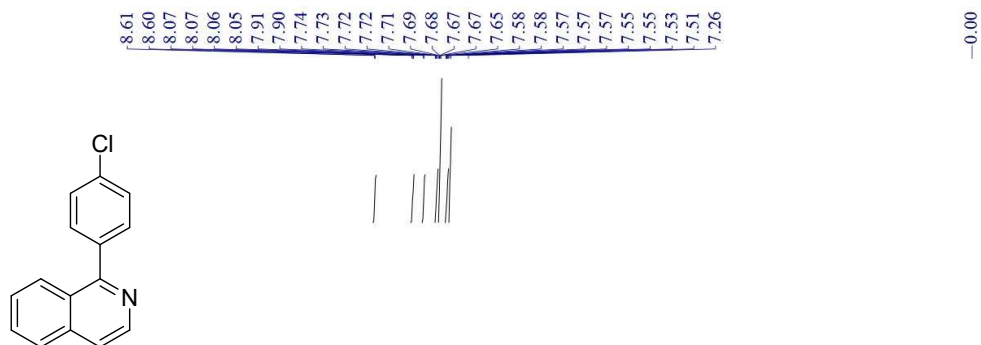

$^1\text{H}$  NMR ( $\text{CDCl}_3$ , 500 MHz)

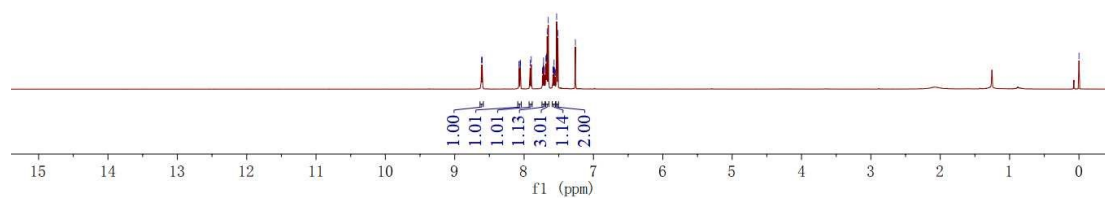

## $^{13}\text{C}\{^1\text{H}\}$ NMR Spectrum of Compound b5

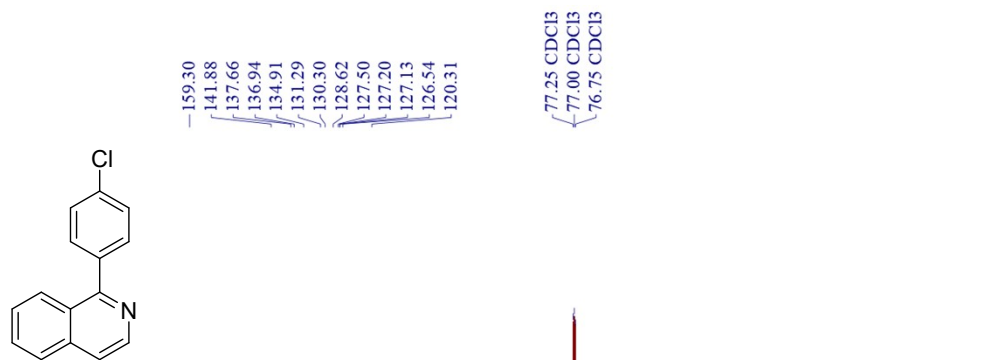

$^{13}\text{C}\{^1\text{H}\}$  NMR ( $\text{CDCl}_3$ , 126 MHz)

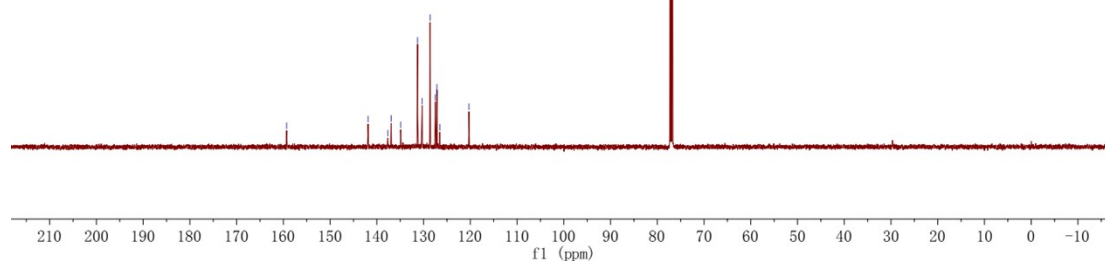

### <sup>1</sup>H NMR Spectrum of Compound b6

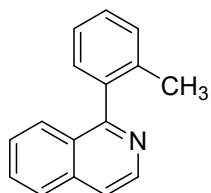

<sup>1</sup>H NMR (CDCl<sub>3</sub>, 500 MHz)

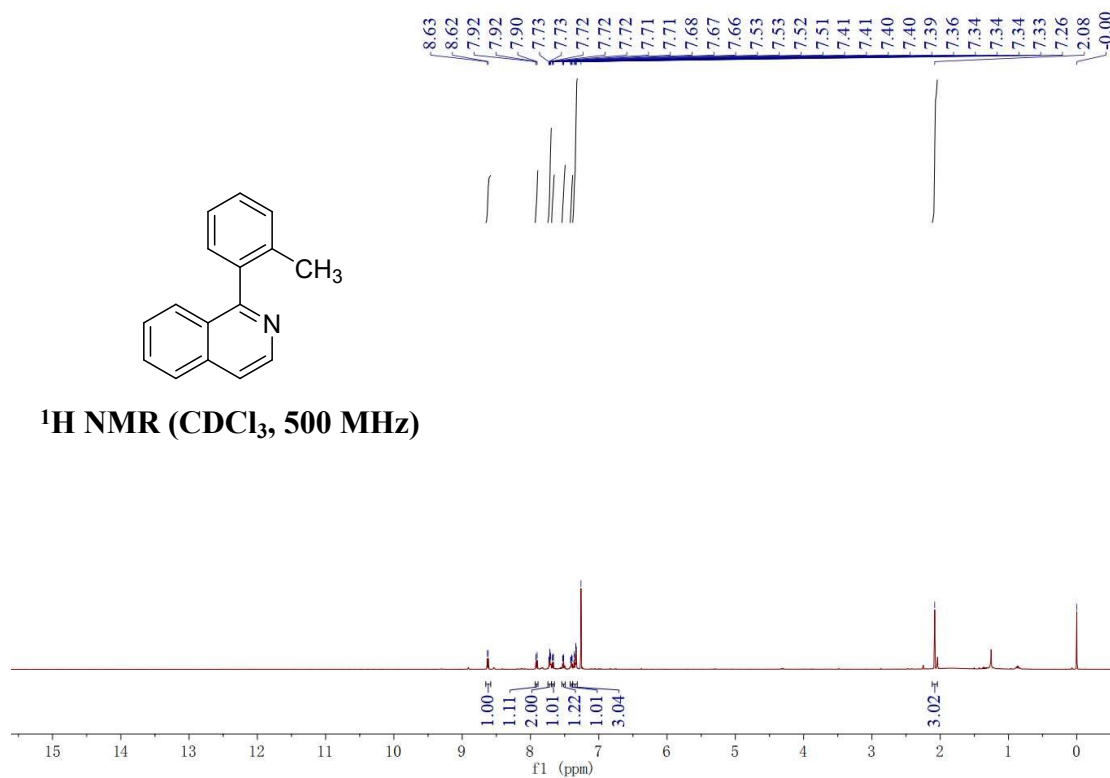

### <sup>1</sup>H NMR Spectrum of Compound b7

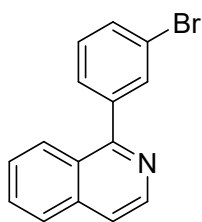

<sup>1</sup>H NMR (CDCl<sub>3</sub>, 500 MHz)

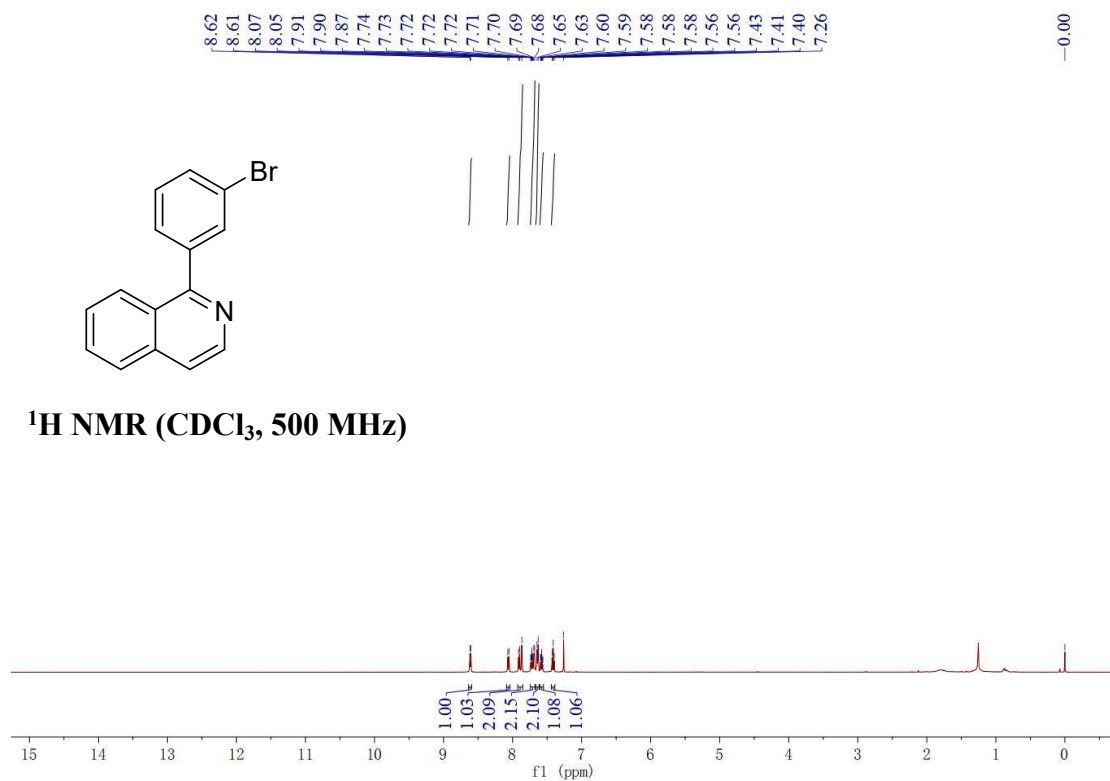



### $^{13}\text{C}\{^1\text{H}\}$ NMR Spectrum of Compound b7

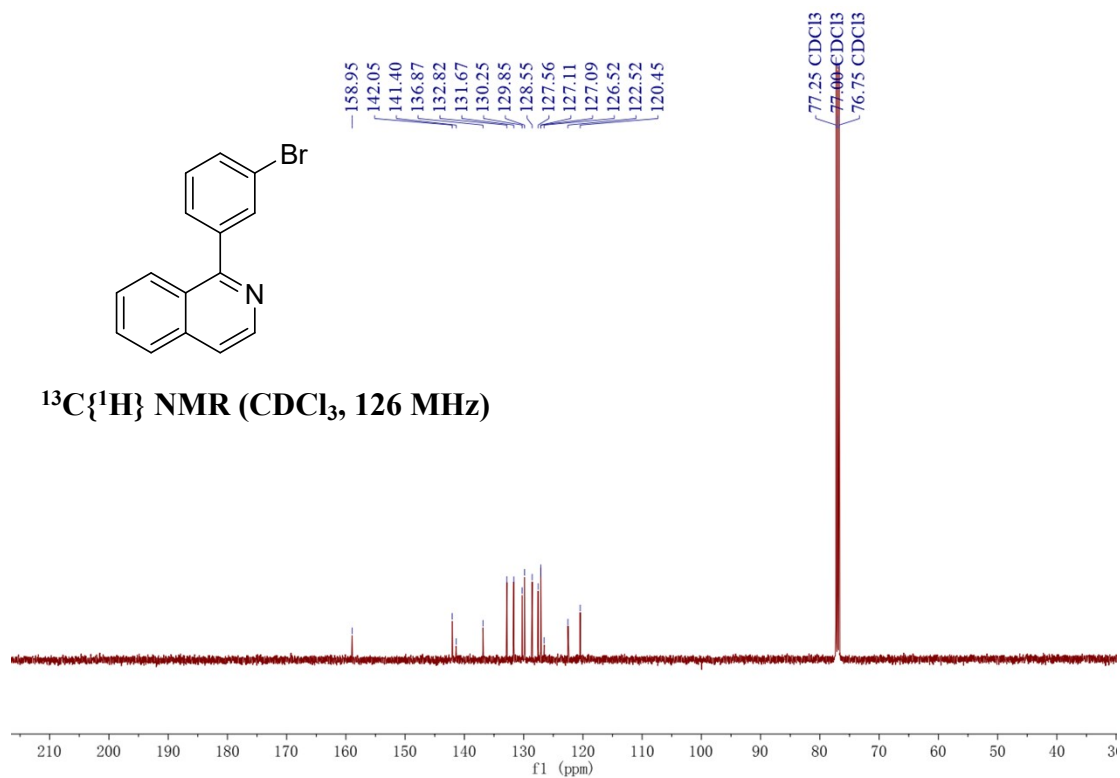

### $^1\text{H}$ NMR Spectrum of Compound b8

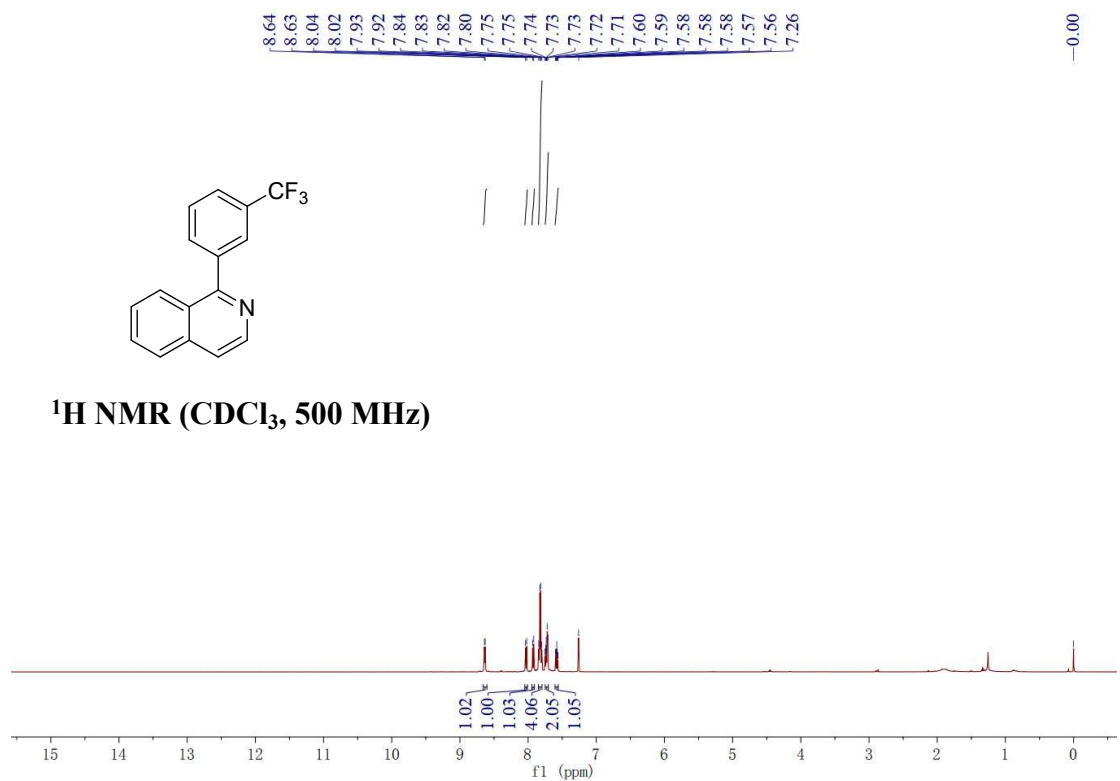

### $^{13}\text{C}\{^1\text{H}\}$ NMR Spectrum of Compound b8

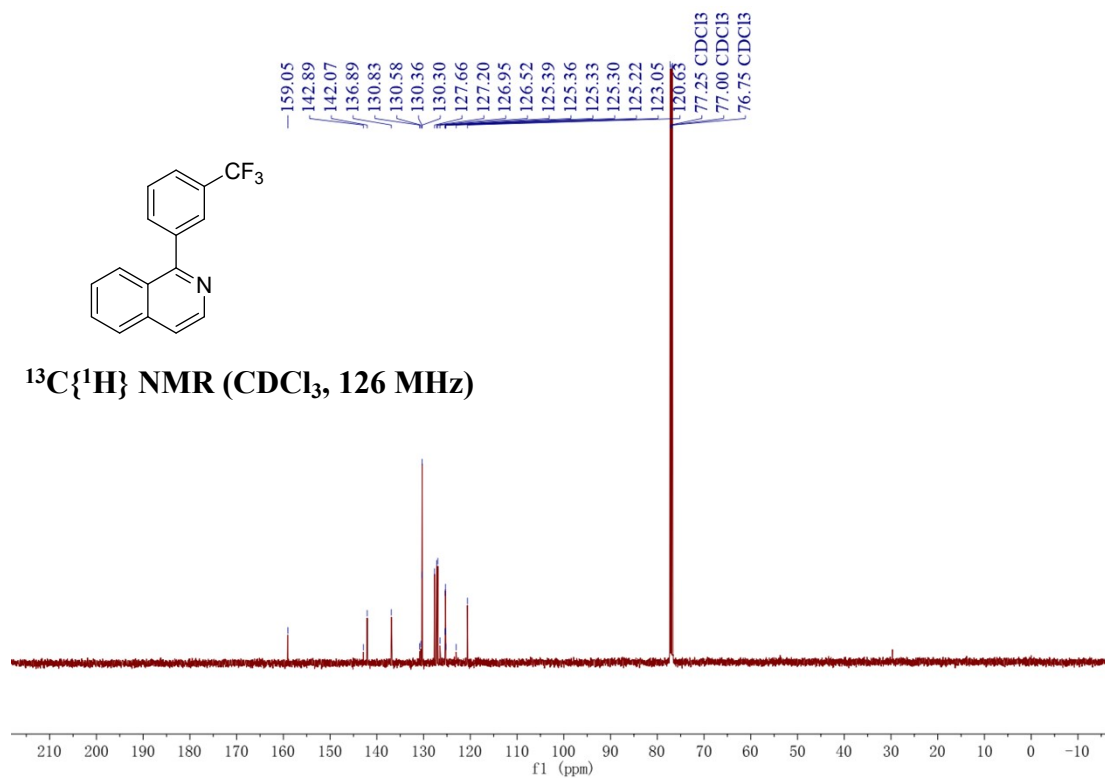

### $^{19}\text{F}\{^1\text{H}\}$ NMR Spectrum of Compound b8

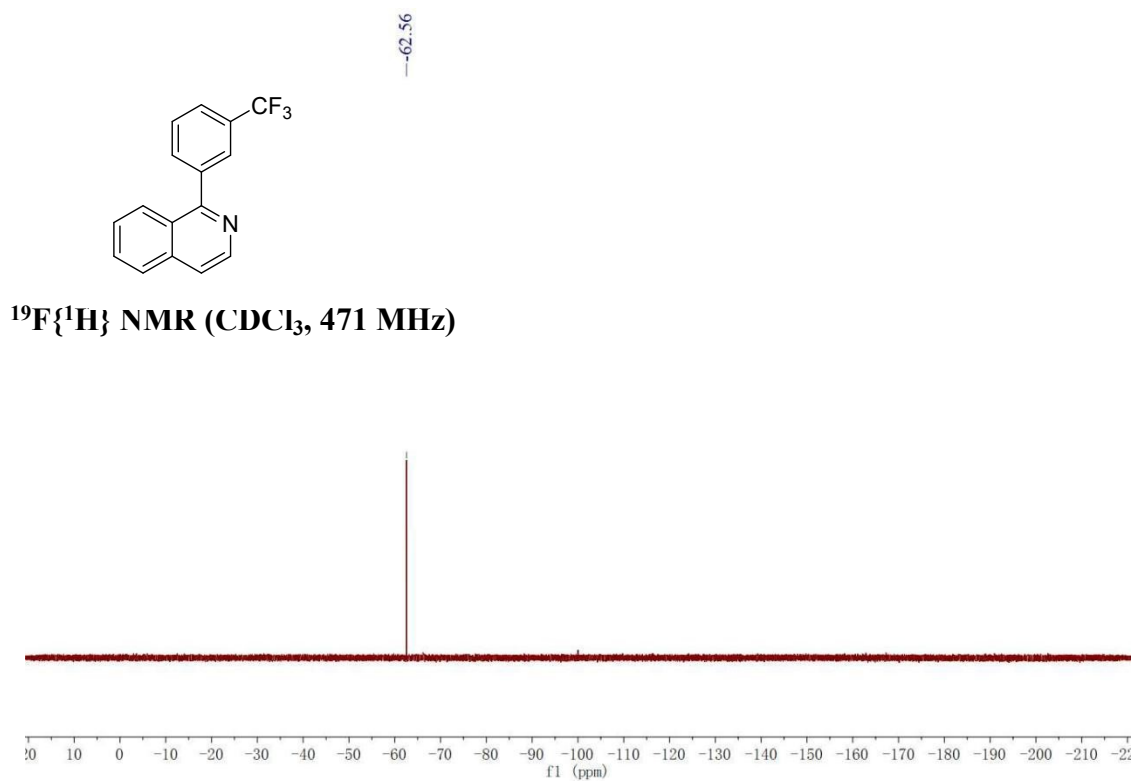

## <sup>1</sup>H NMR Spectrum of Compound b9

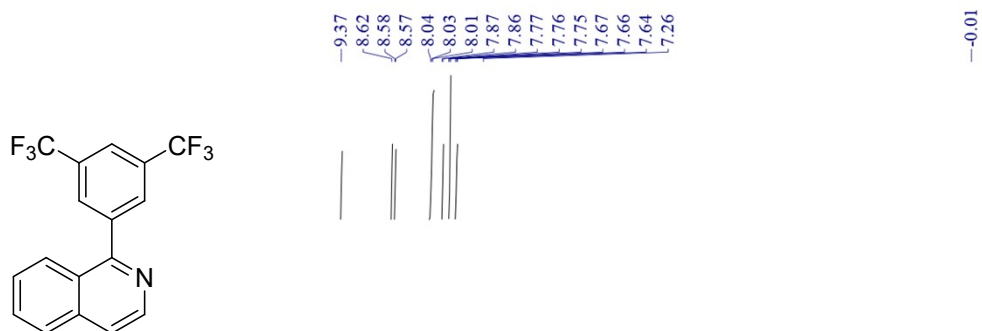

<sup>1</sup>H NMR (CDCl<sub>3</sub>, 500 MHz)

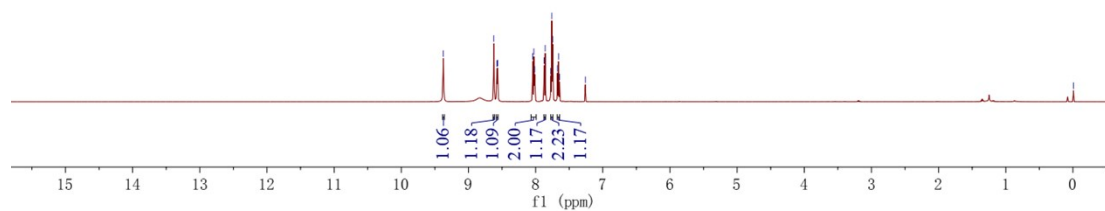

## <sup>13</sup>C{<sup>1</sup>H} NMR Spectrum of Compound b9

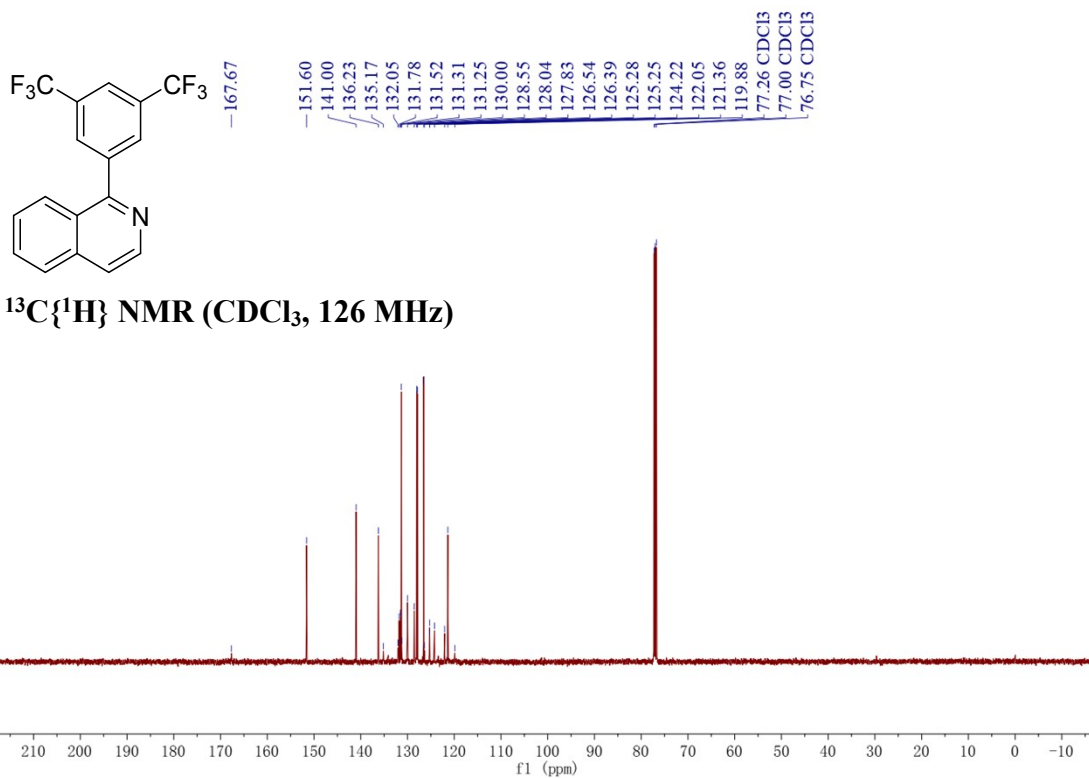

<sup>13</sup>C{<sup>1</sup>H} NMR (CDCl<sub>3</sub>, 126 MHz)

### $^{19}\text{F}\{^1\text{H}\}$ NMR Spectrum of Compound b9

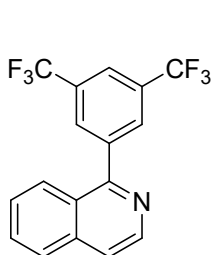

---62.86

$^{19}\text{F}\{^1\text{H}\}$  NMR ( $\text{CDCl}_3$ , 471 MHz)

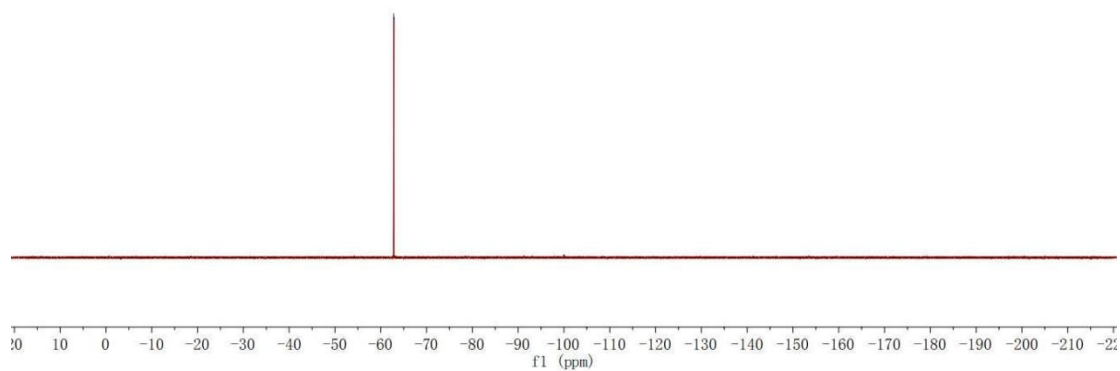

### $^1\text{H}$ NMR Spectrum of Compound c1

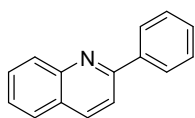

8.24, 8.22, 8.19, 8.18, 8.18, 8.17, 8.16, 8.16, 8.16, 7.89, 7.88, 7.84, 7.84, 7.83, 7.82, 7.75, 7.74, 7.73, 7.73, 7.72, 7.71, 7.55, 7.54, 7.53, 7.53, 7.52, 7.48, 7.47, 7.45, 7.26

---0.00

$^1\text{H}$  NMR ( $\text{CDCl}_3$ , 500 MHz)

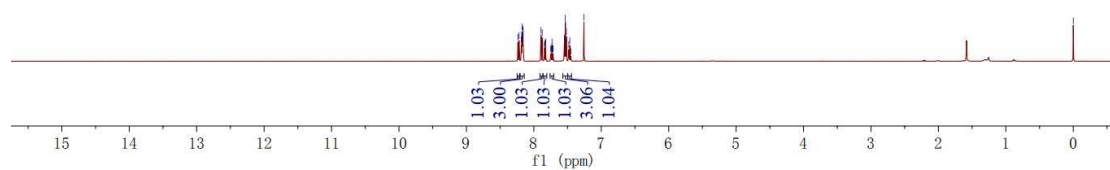

### $^{13}\text{C}\{^1\text{H}\}$ NMR Spectrum of Compound c1

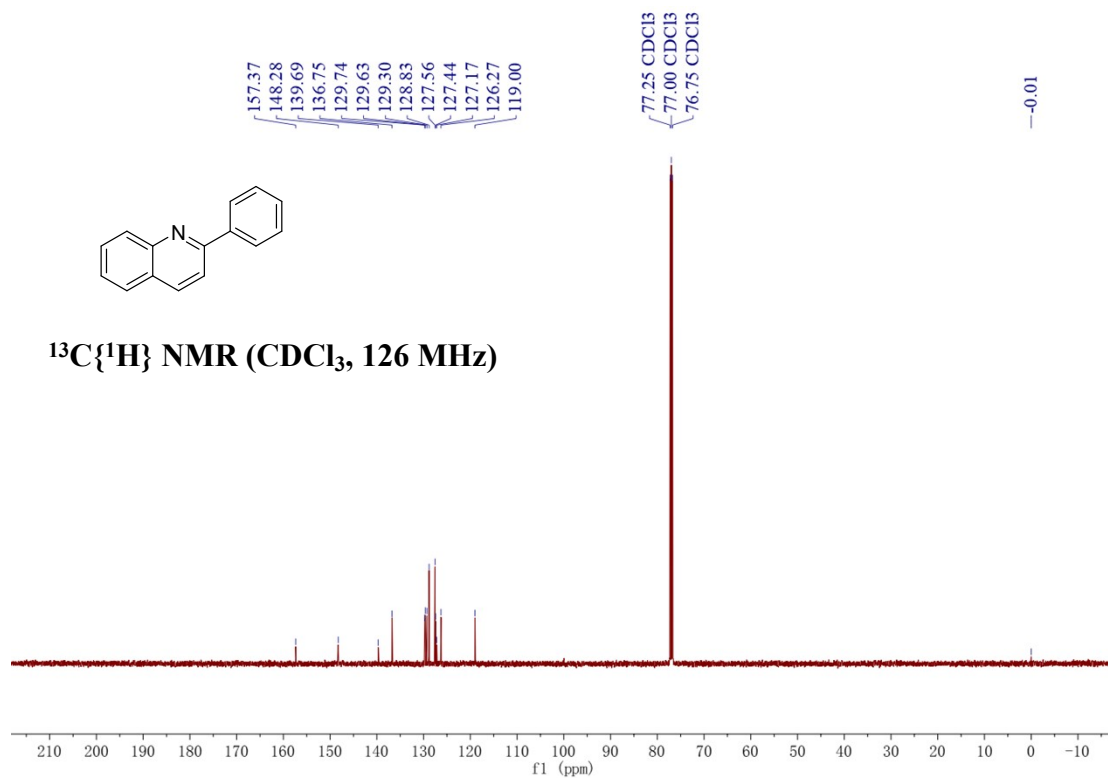

### $^1\text{H}$ NMR Spectrum of Compound c2-1

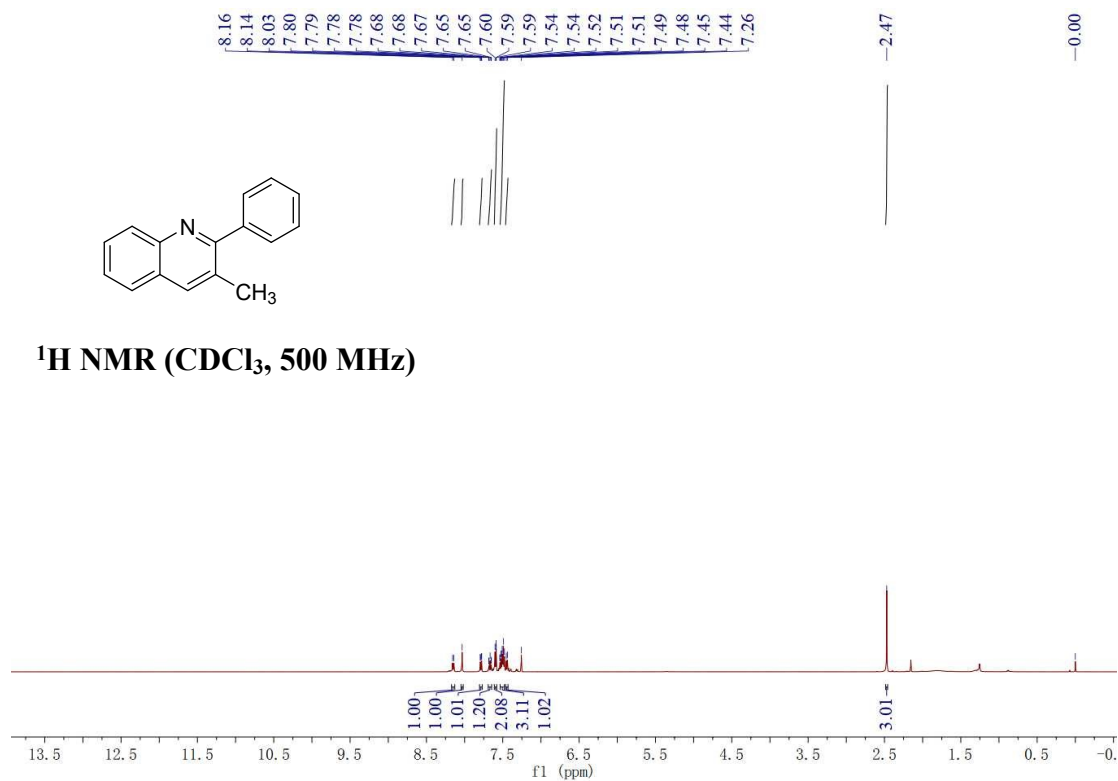

### $^{13}\text{C}\{^1\text{H}\}$ NMR Spectrum of Compound c2-1

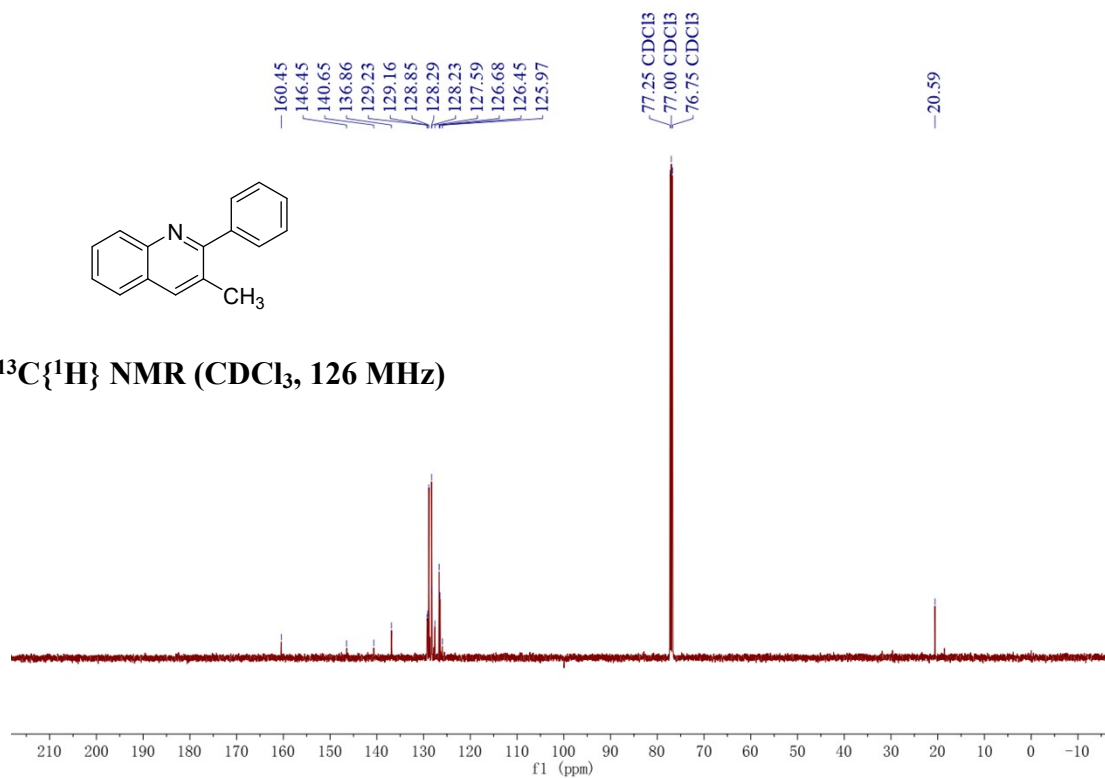

### $^1\text{H}$ NMR Spectrum of Compound c2-2

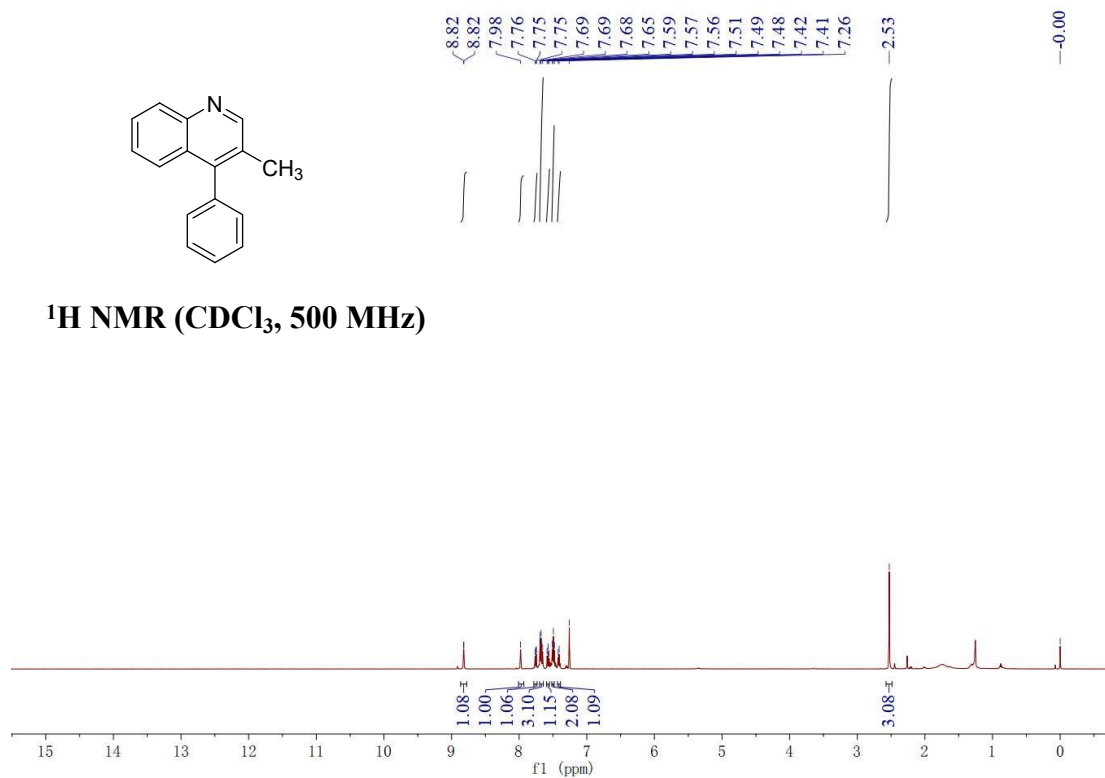

### $^{13}\text{C}\{^1\text{H}\}$ NMR Spectrum of Compound c2-2

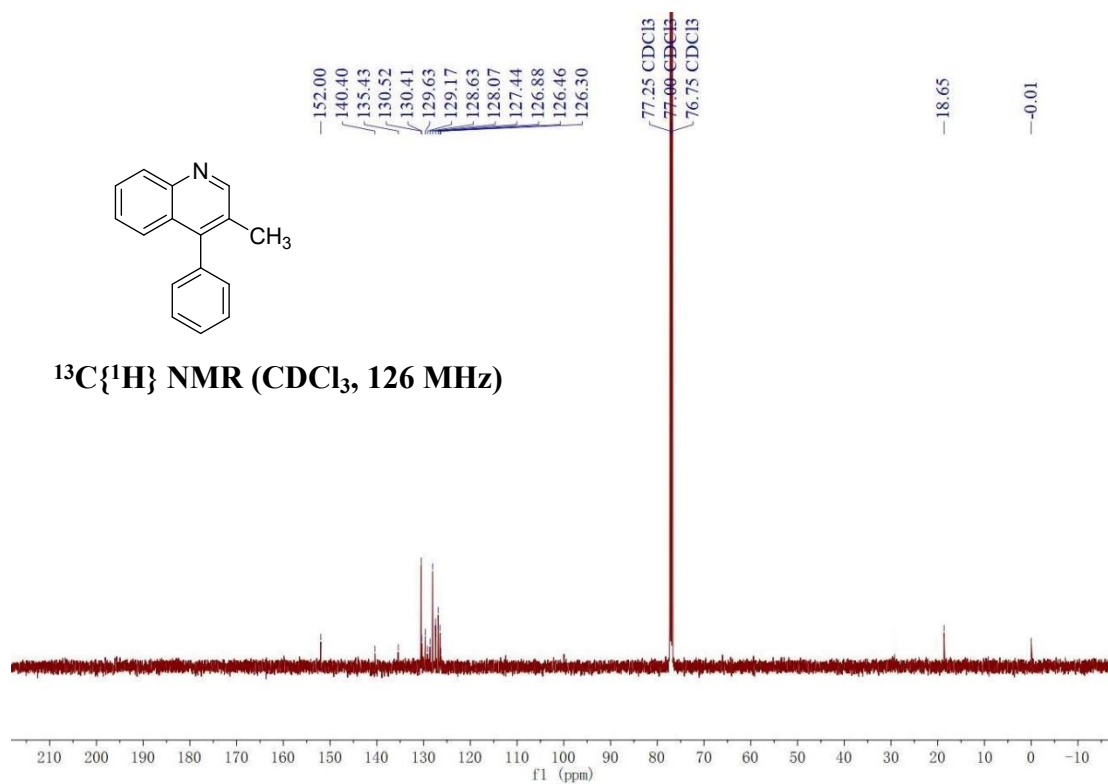

### $^1\text{H}$ NMR Spectrum of Compound c3

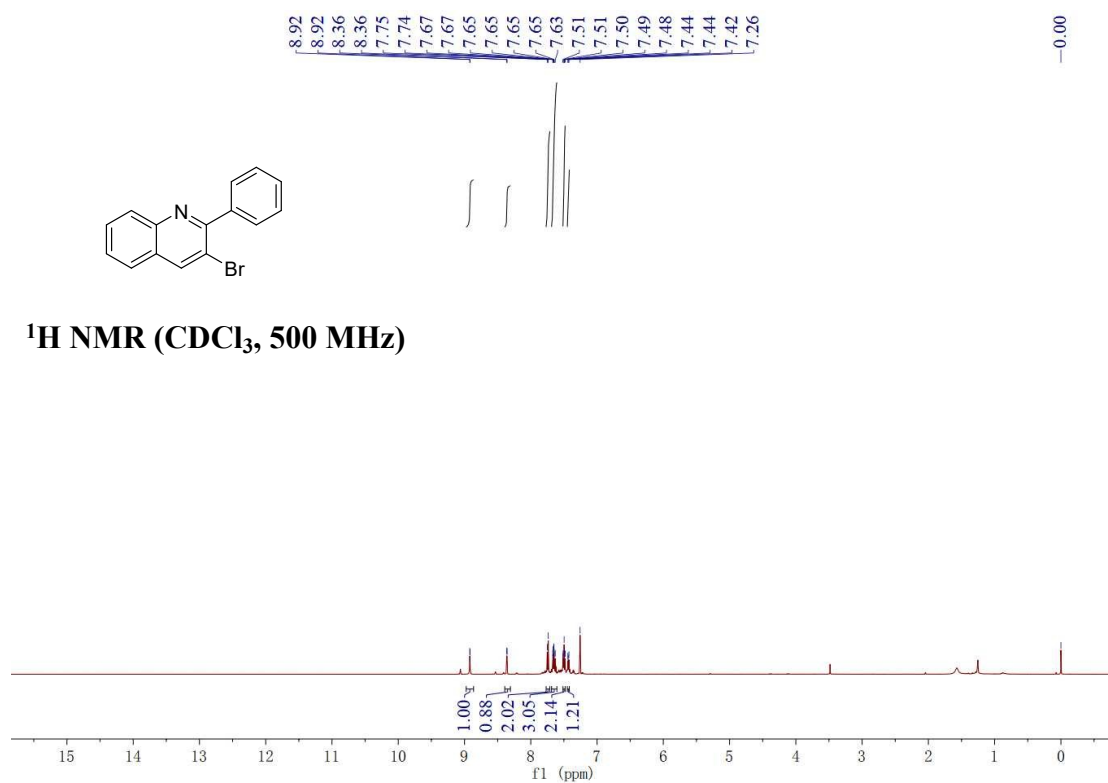

### $^{13}\text{C}\{^1\text{H}\}$ NMR Spectrum of Compound c3

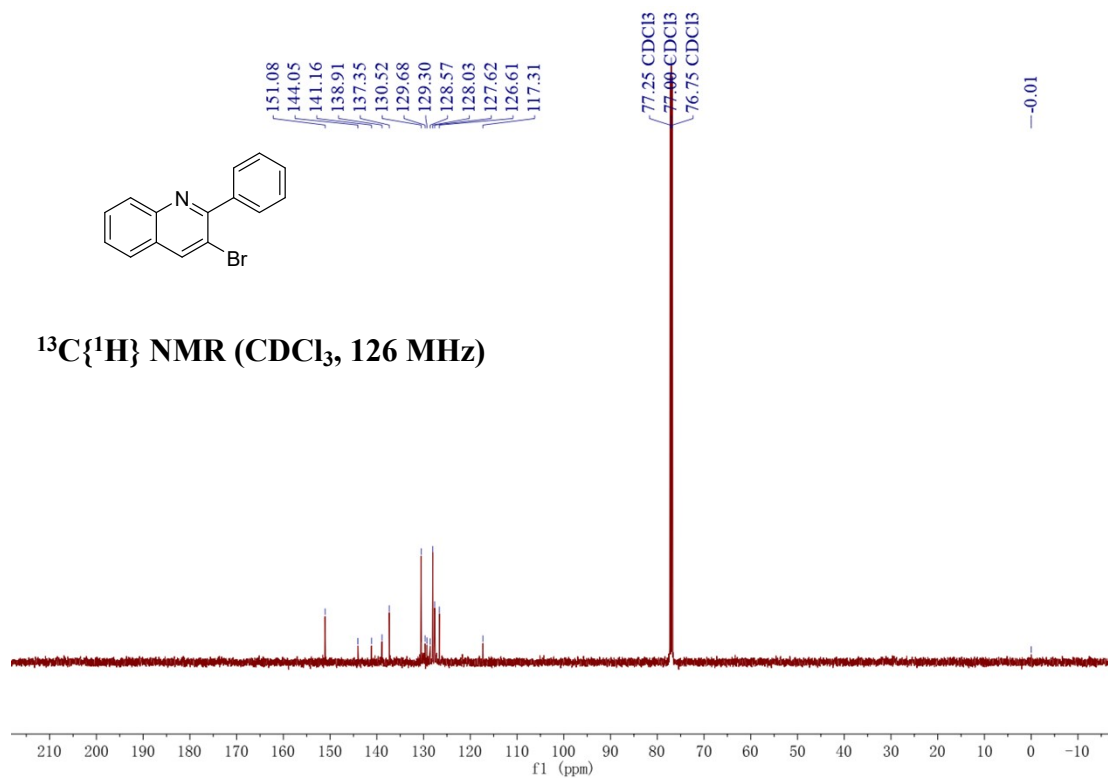

### $^1\text{H}$ NMR Spectrum of Compound c4

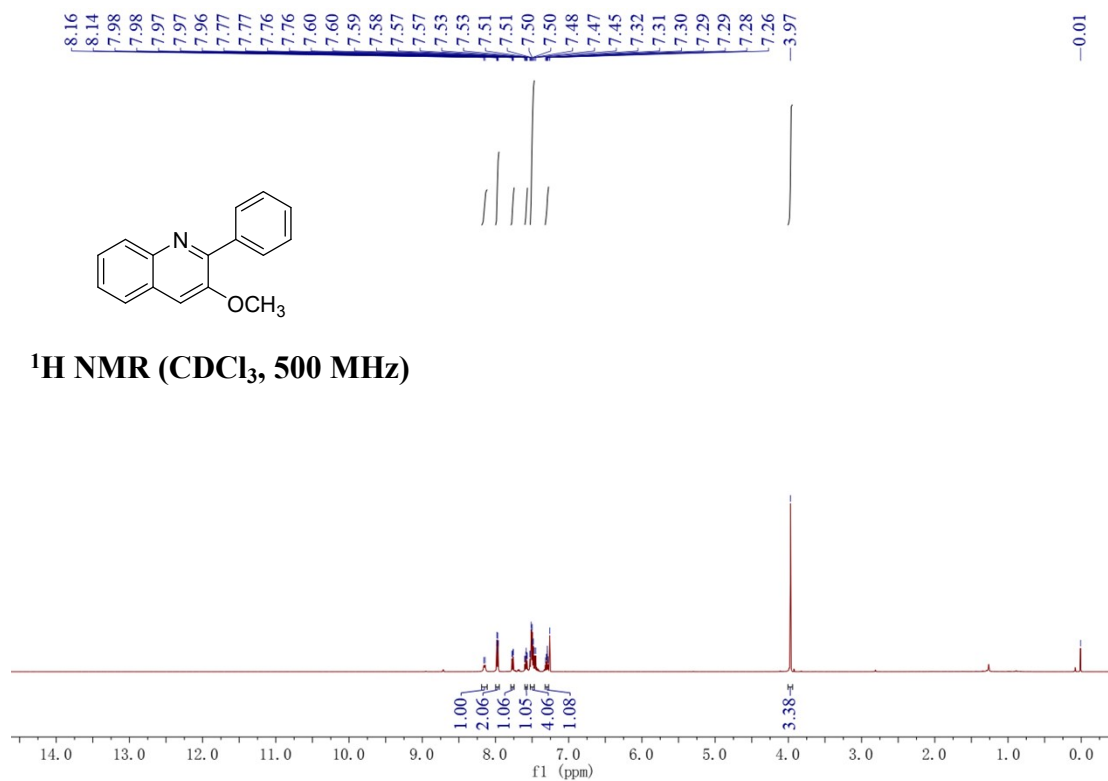



### $^{13}\text{C}\{^1\text{H}\}$ NMR Spectrum of Compound c4

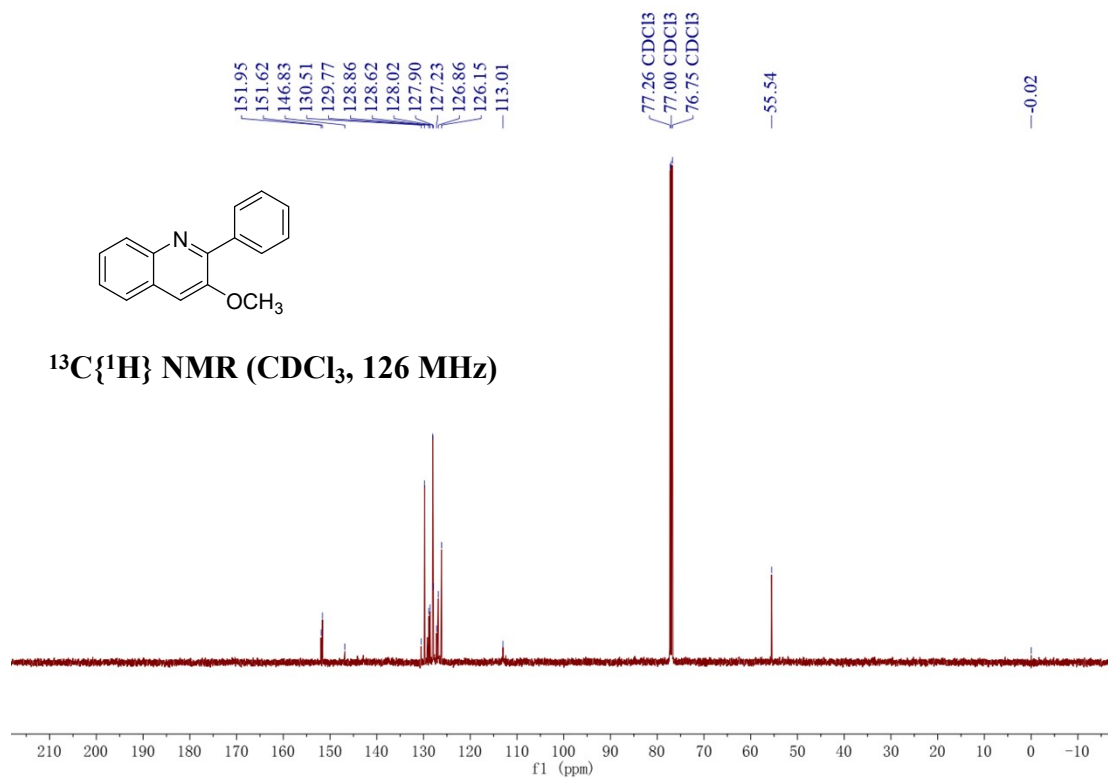

### $^1\text{H}$ NMR Spectrum of Compound c5

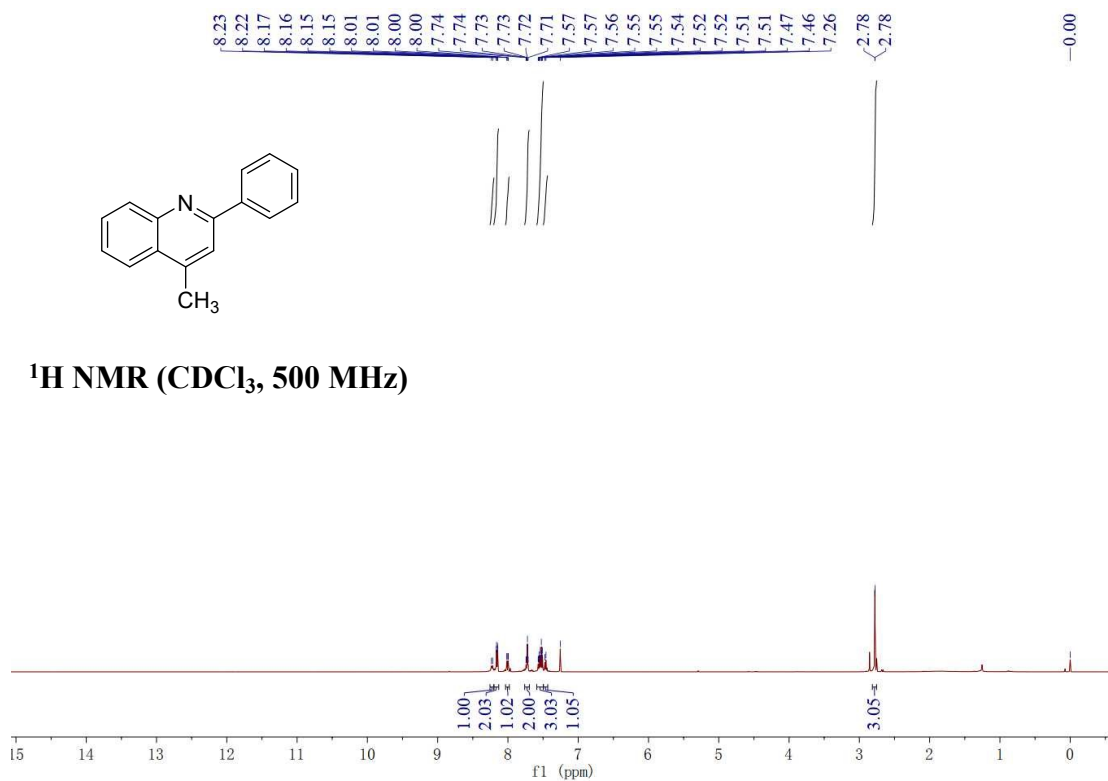

### $^{13}\text{C}\{^1\text{H}\}$ NMR Spectrum of Compound c5

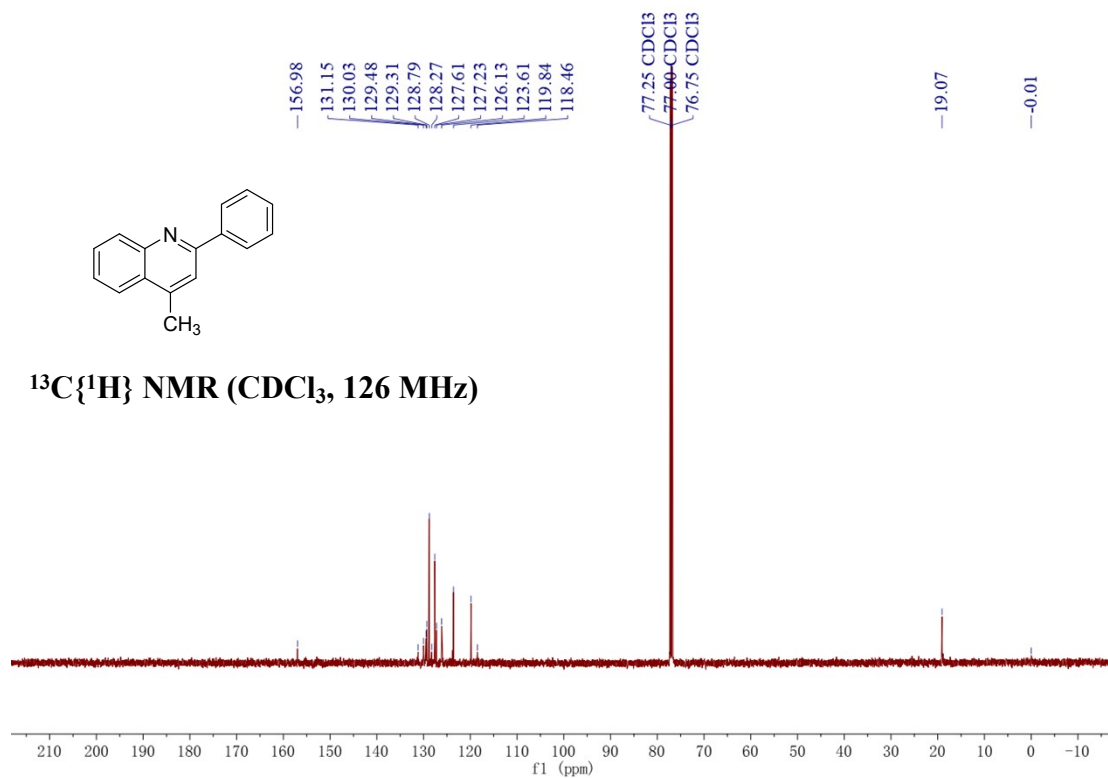

### $^1\text{H}$ NMR Spectrum of Compound c6

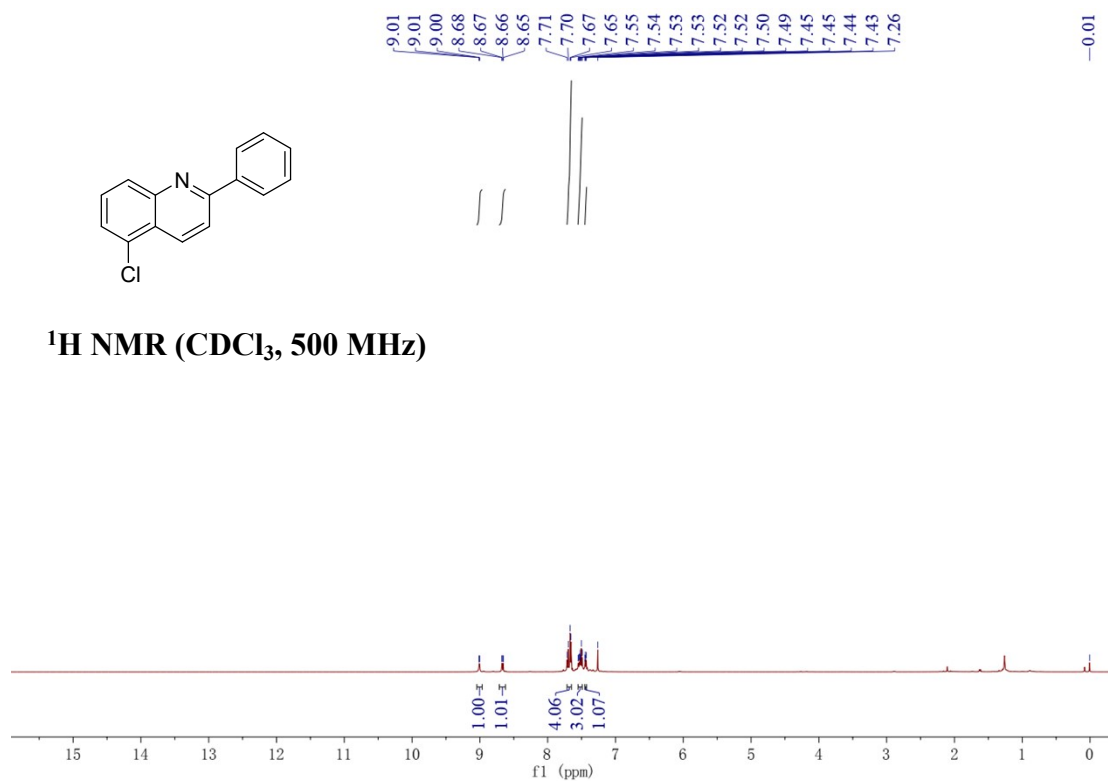

### $^{13}\text{C}\{^1\text{H}\}$ NMR Spectrum of Compound c6

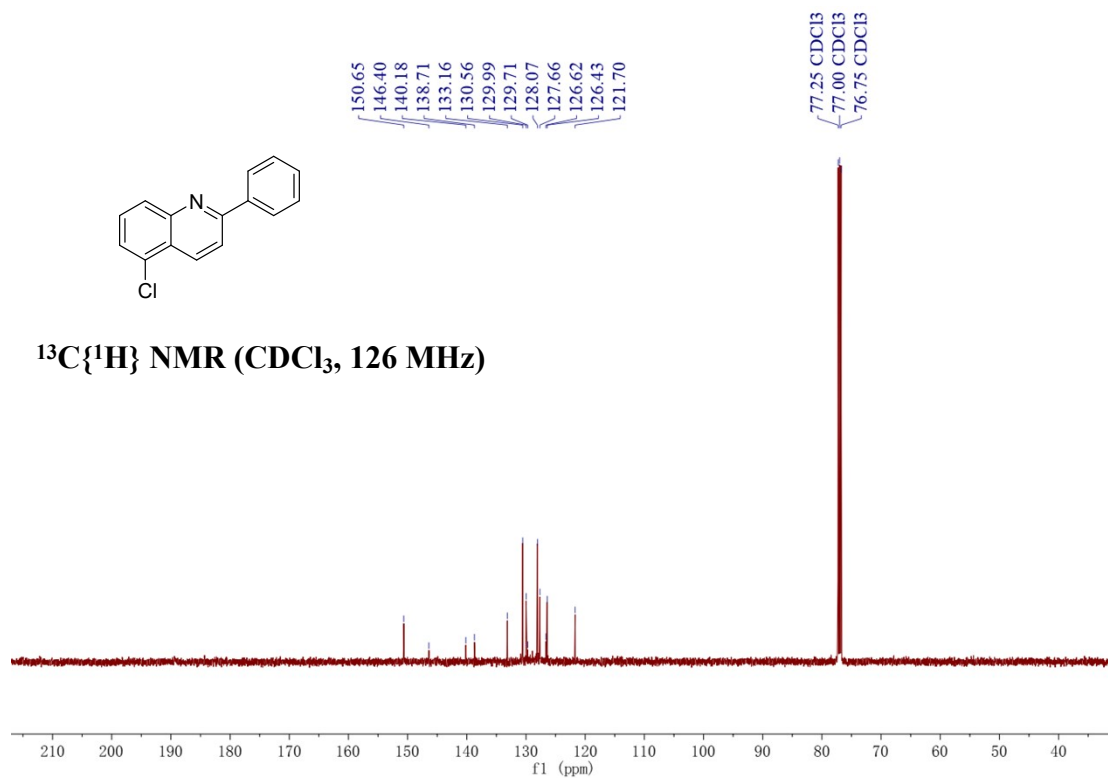

### $^1\text{H}$ NMR Spectrum of Compound c7

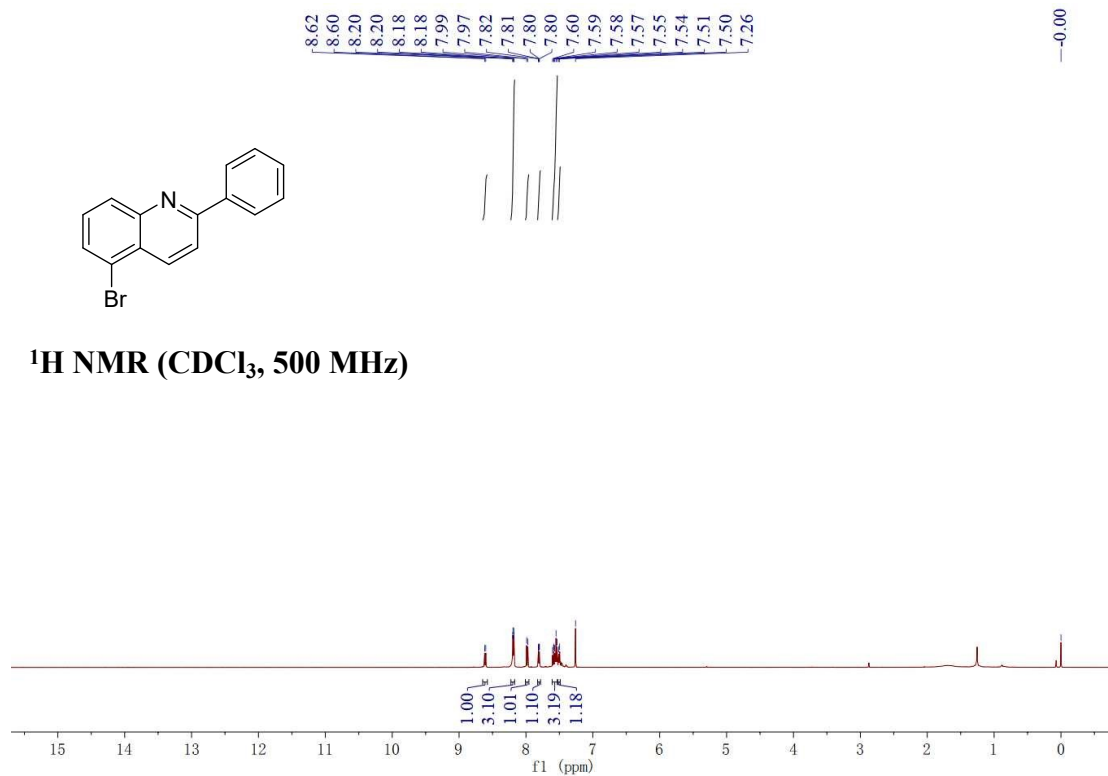

### $^{13}\text{C}\{^1\text{H}\}$ NMR Spectrum of Compound c7

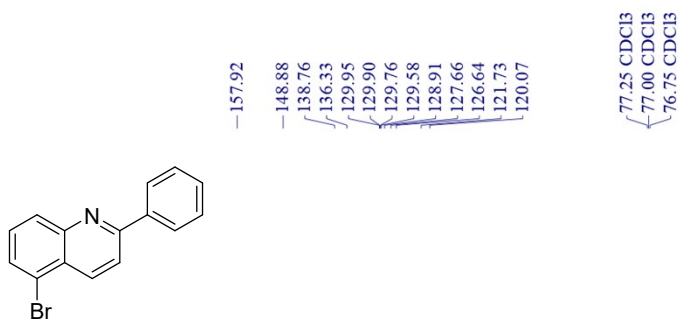

### $^{13}\text{C}\{^1\text{H}\}$ NMR (CDCl<sub>3</sub>, 126 MHz)

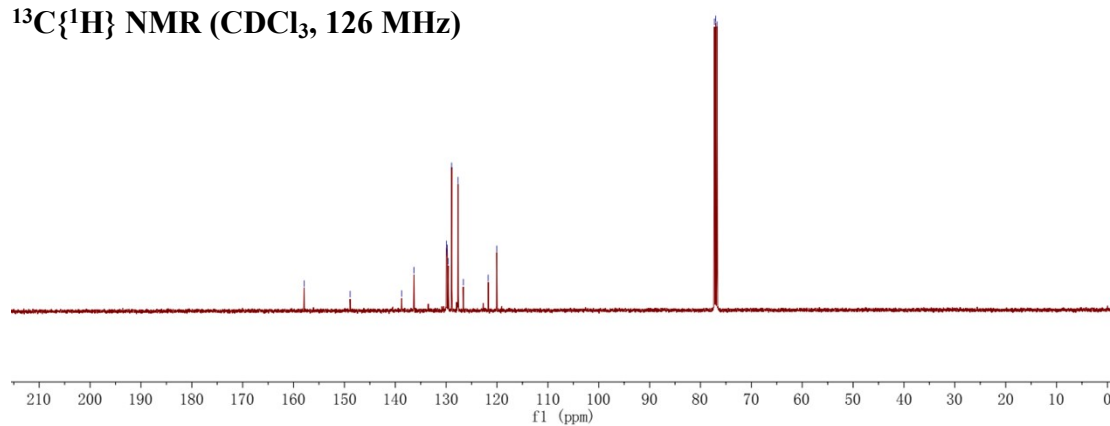

### $^1\text{H}$ NMR Spectrum of Compound c8-1

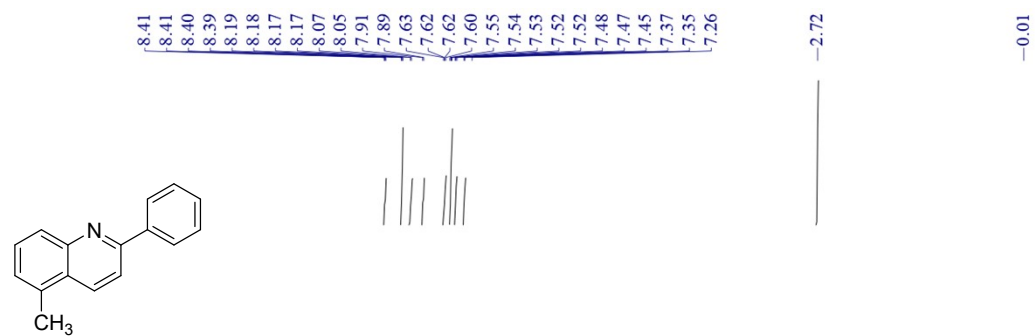

### $^1\text{H}$ NMR (CDCl<sub>3</sub>, 500 MHz)

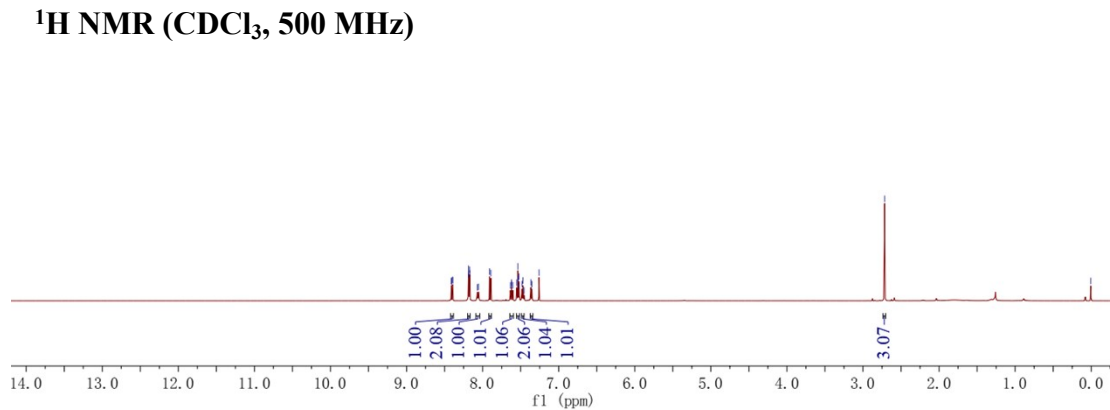

### $^{13}\text{C}\{^1\text{H}\}$ NMR Spectrum of Compound c8-1

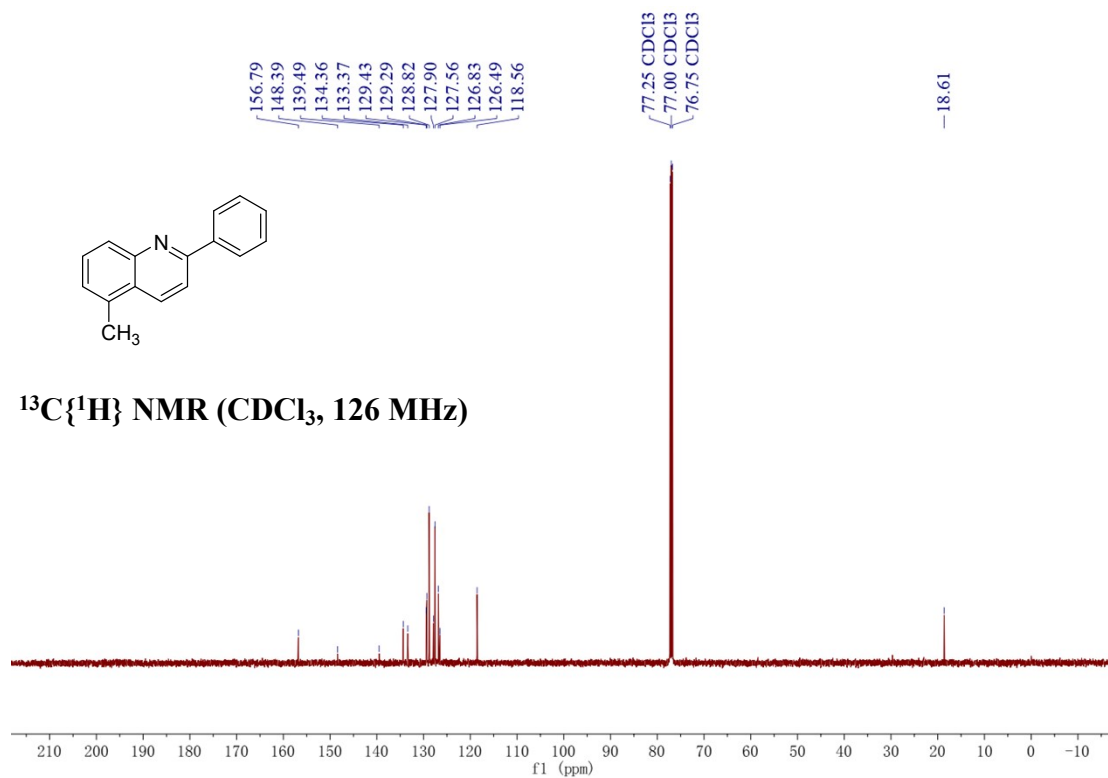

### $^1\text{H}$ NMR Spectrum of Compound c8-2

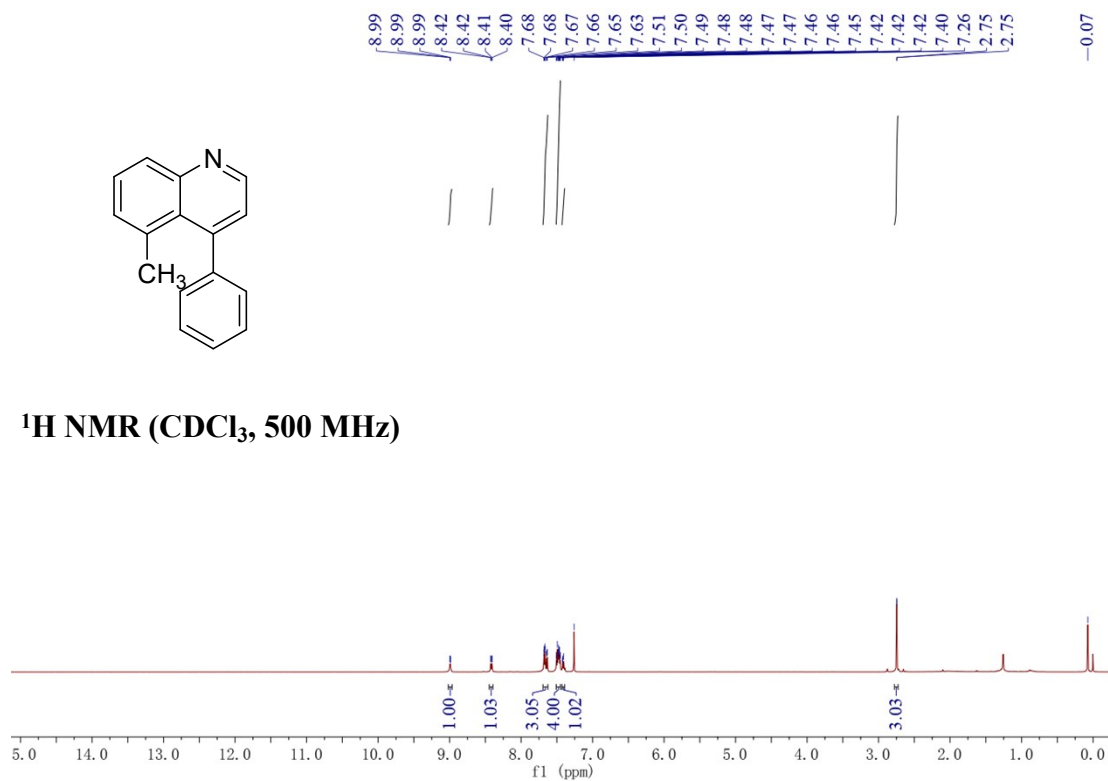

### $^{13}\text{C}\{^1\text{H}\}$ NMR Spectrum of Compound c8-2

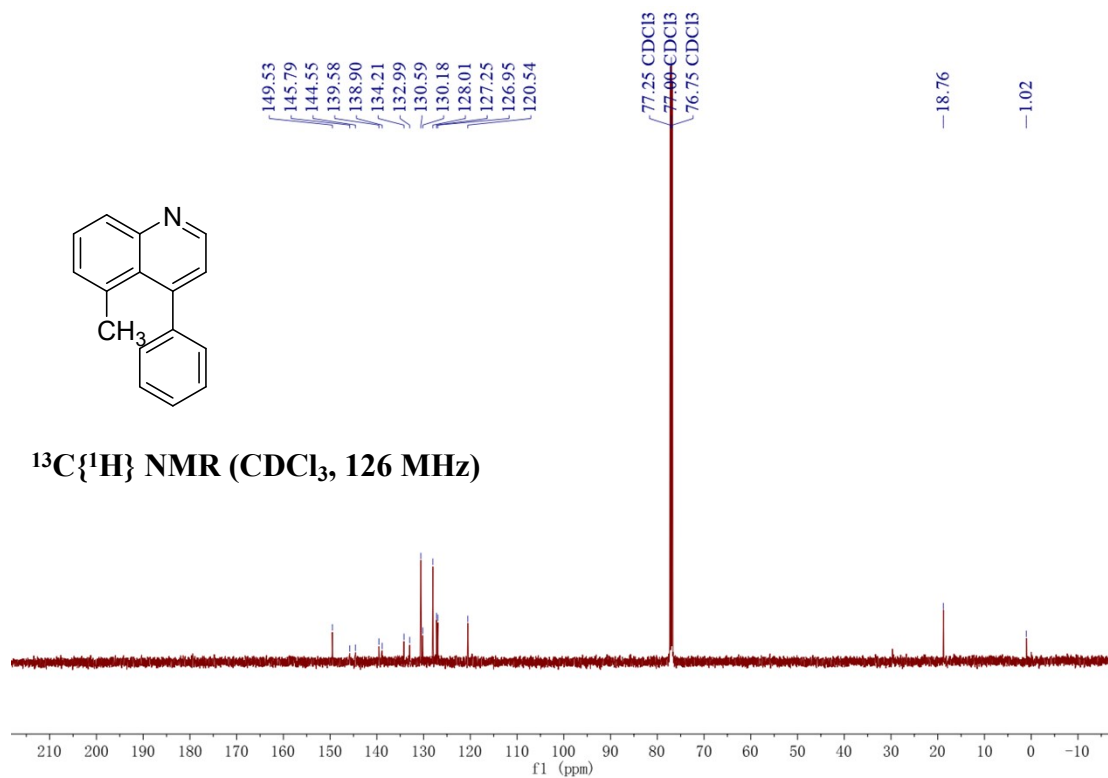

### $^1\text{H}$ NMR Spectrum of Compound c9

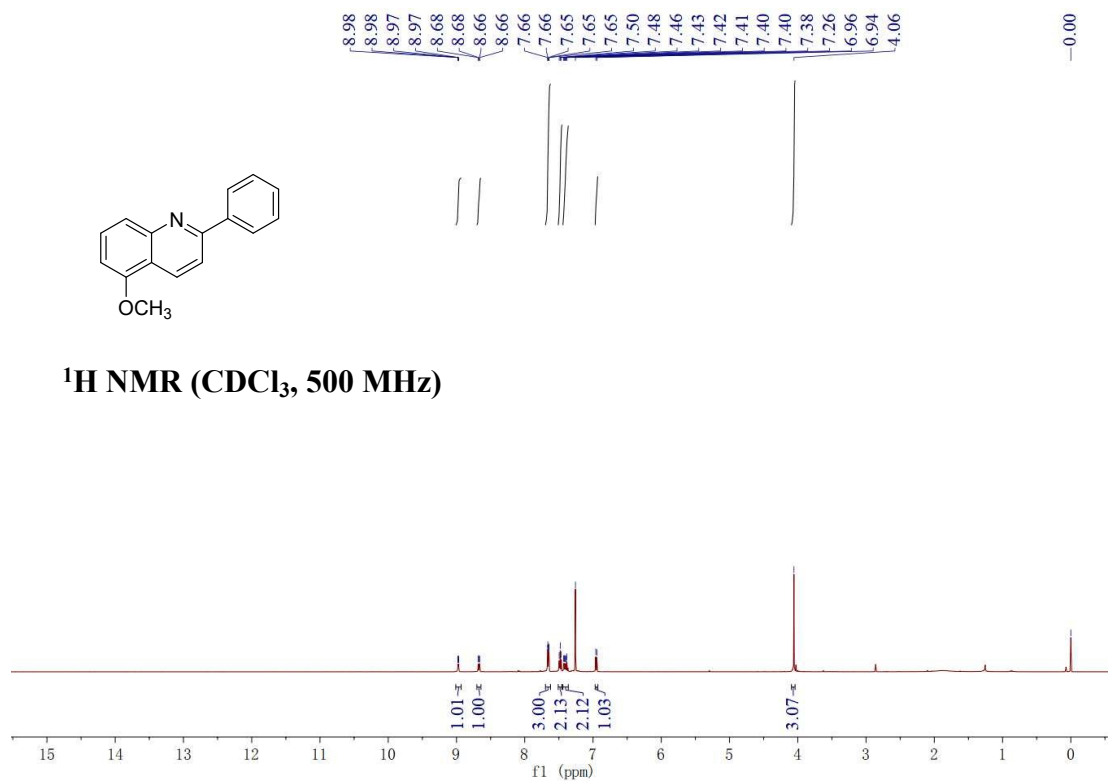

### $^{13}\text{C}\{^1\text{H}\}$ NMR Spectrum of Compound c9

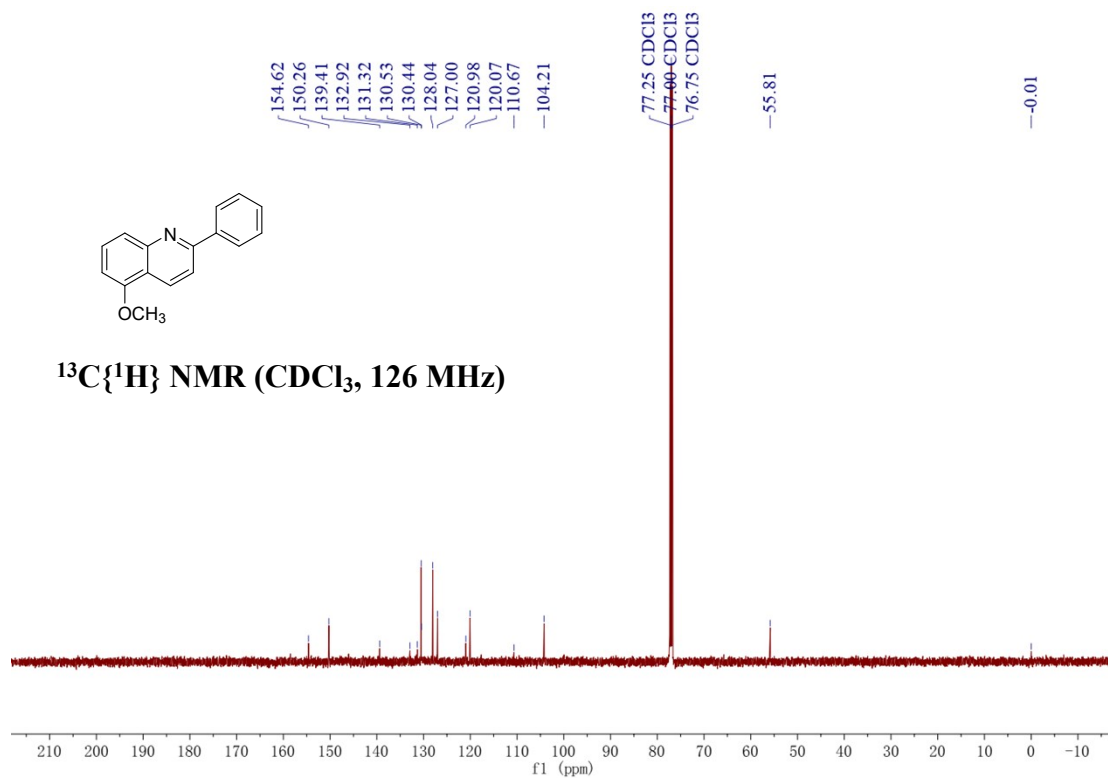

### $^1\text{H}$ NMR Spectrum of Compound c10-1

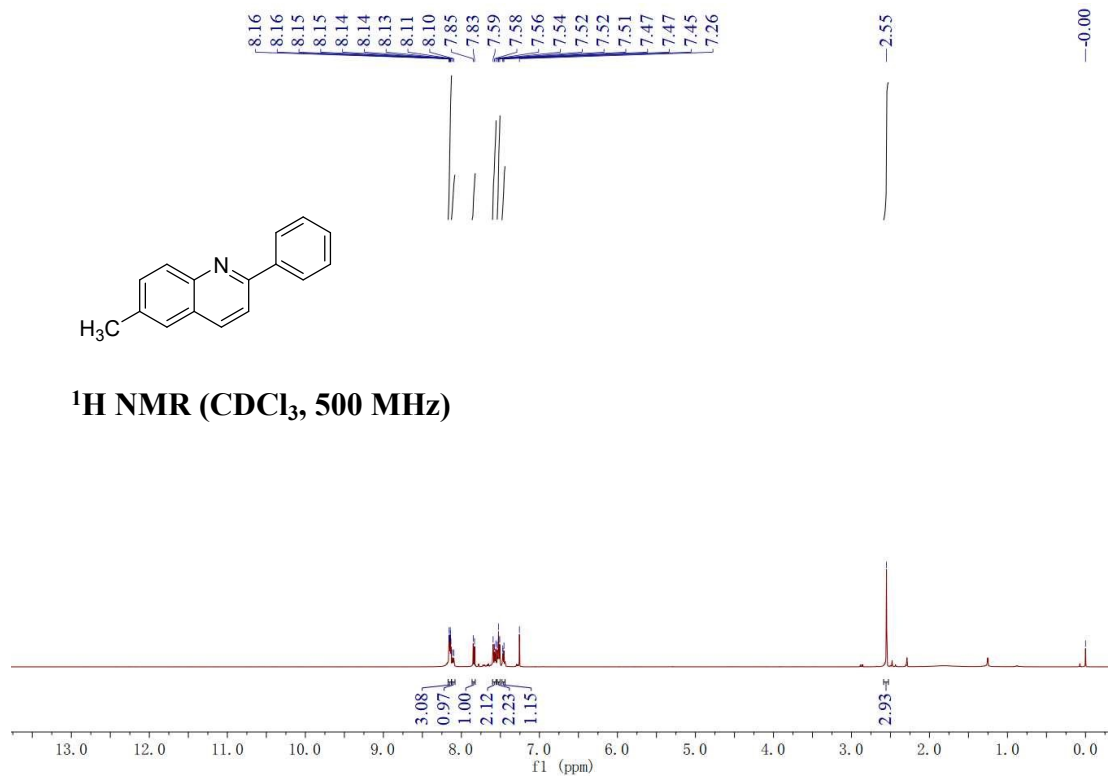

### $^{13}\text{C}\{^1\text{H}\}$ NMR Spectrum of Compound c10-1

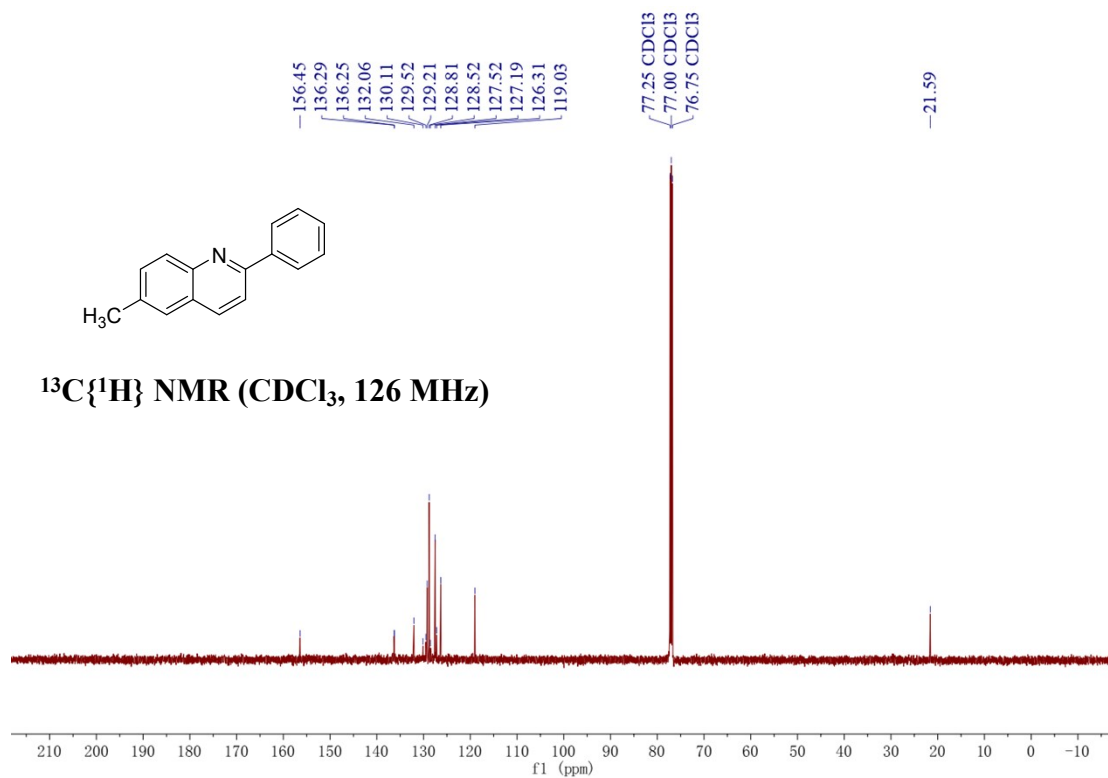

### $^1\text{H}$ NMR Spectrum of Compound c10-2

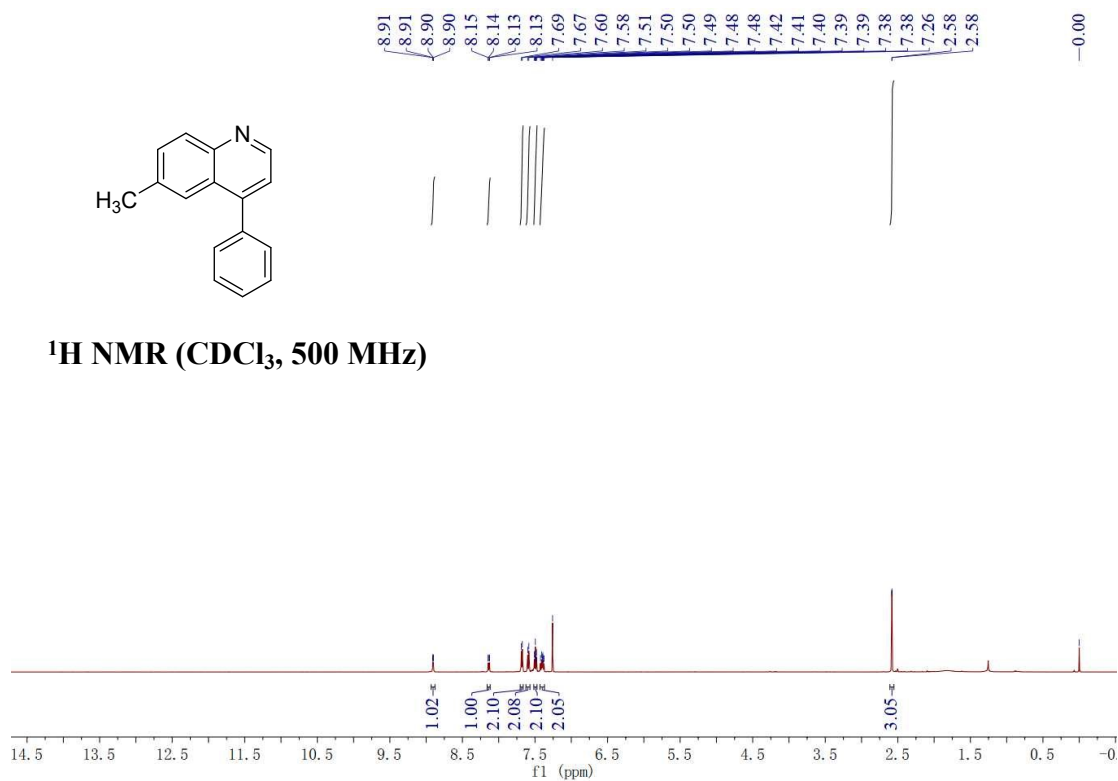



### $^{13}\text{C}\{^1\text{H}\}$ NMR Spectrum of Compound c10-2

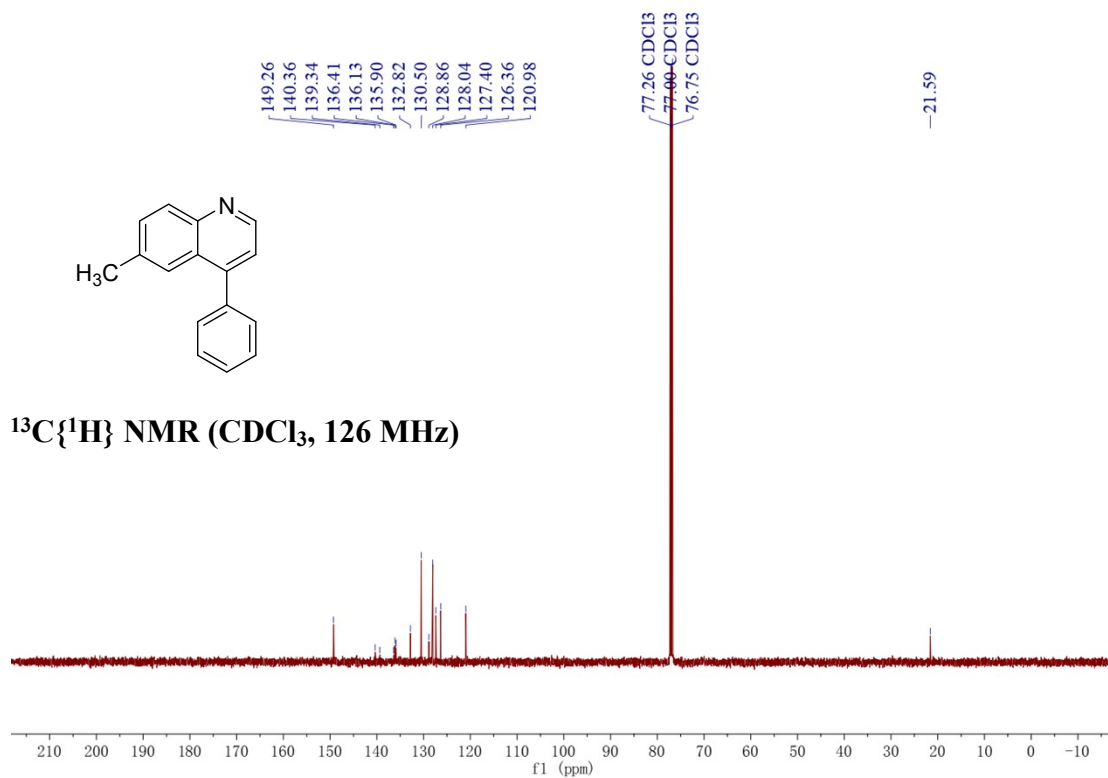

### $^1\text{H}$ NMR Spectrum of Compound c11

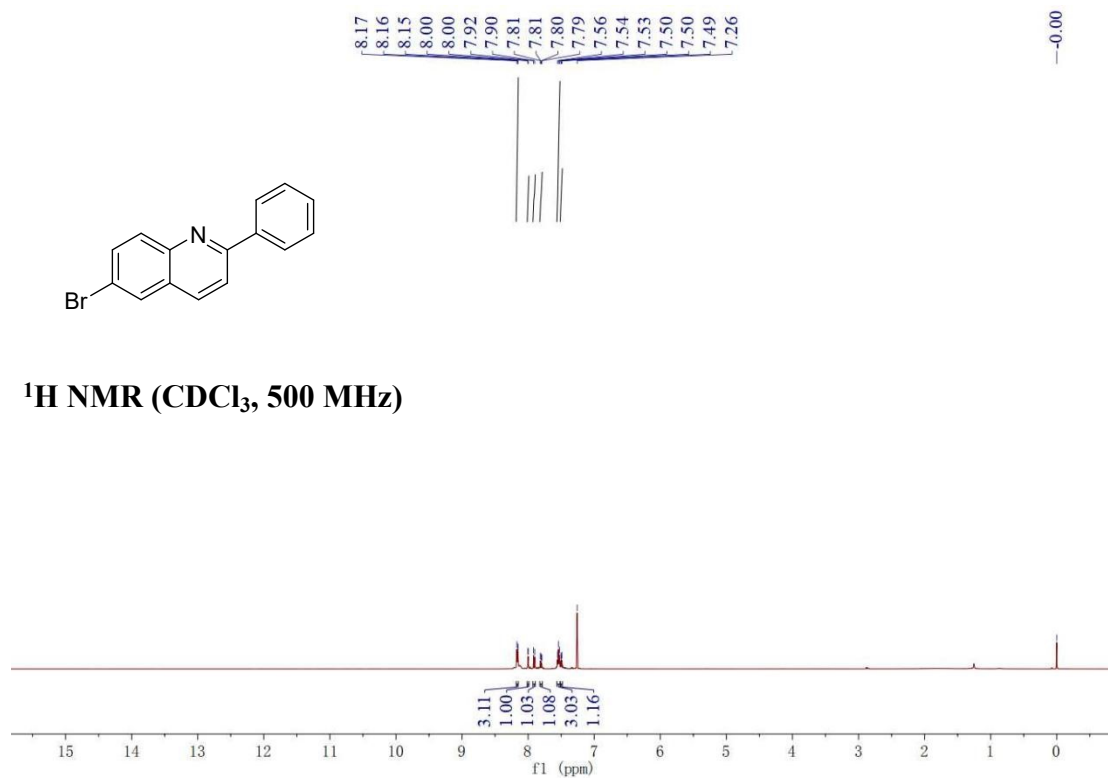

### $^{13}\text{C}\{^1\text{H}\}$ NMR Spectrum of Compound c11

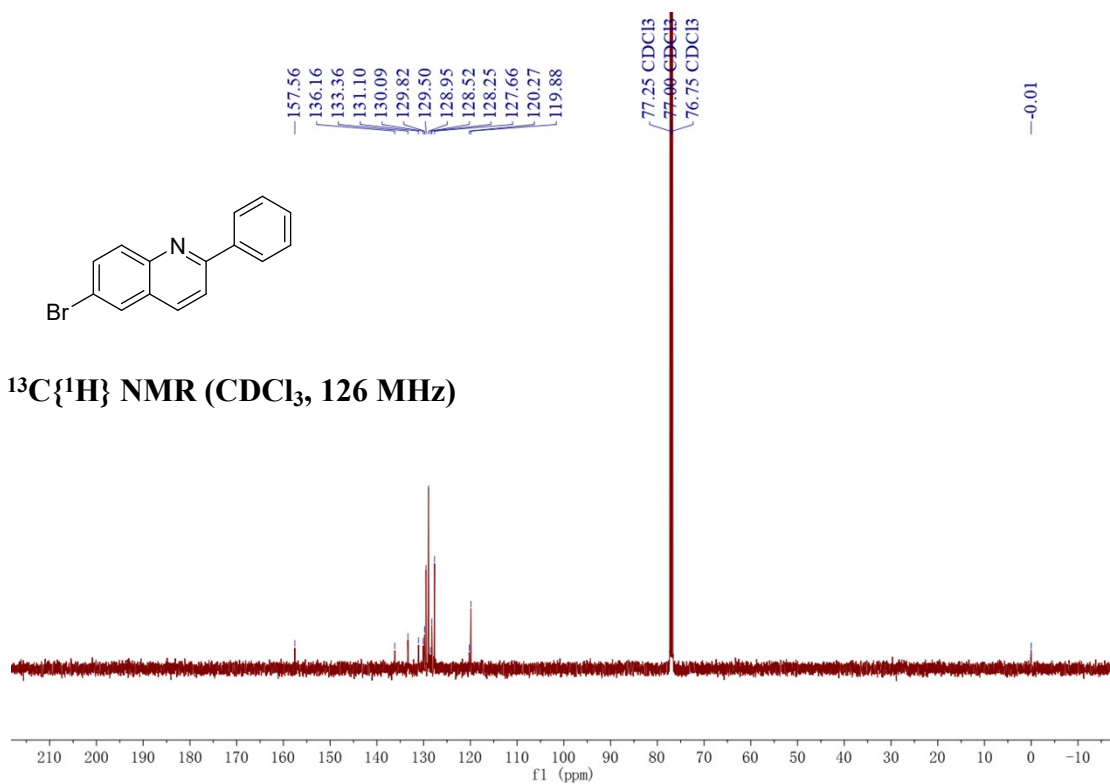

### $^1\text{H}$ NMR Spectrum of Compound c12-1

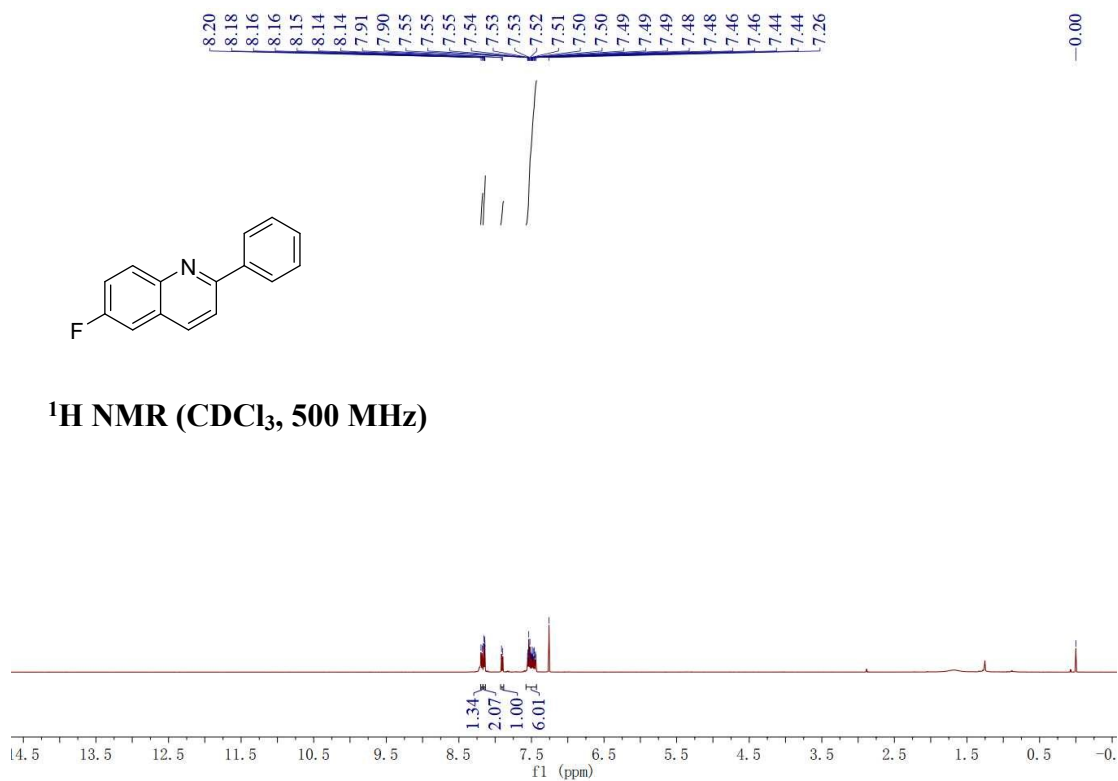

### $^{13}\text{C}\{^1\text{H}\}$ NMR Spectrum of Compound c12-1

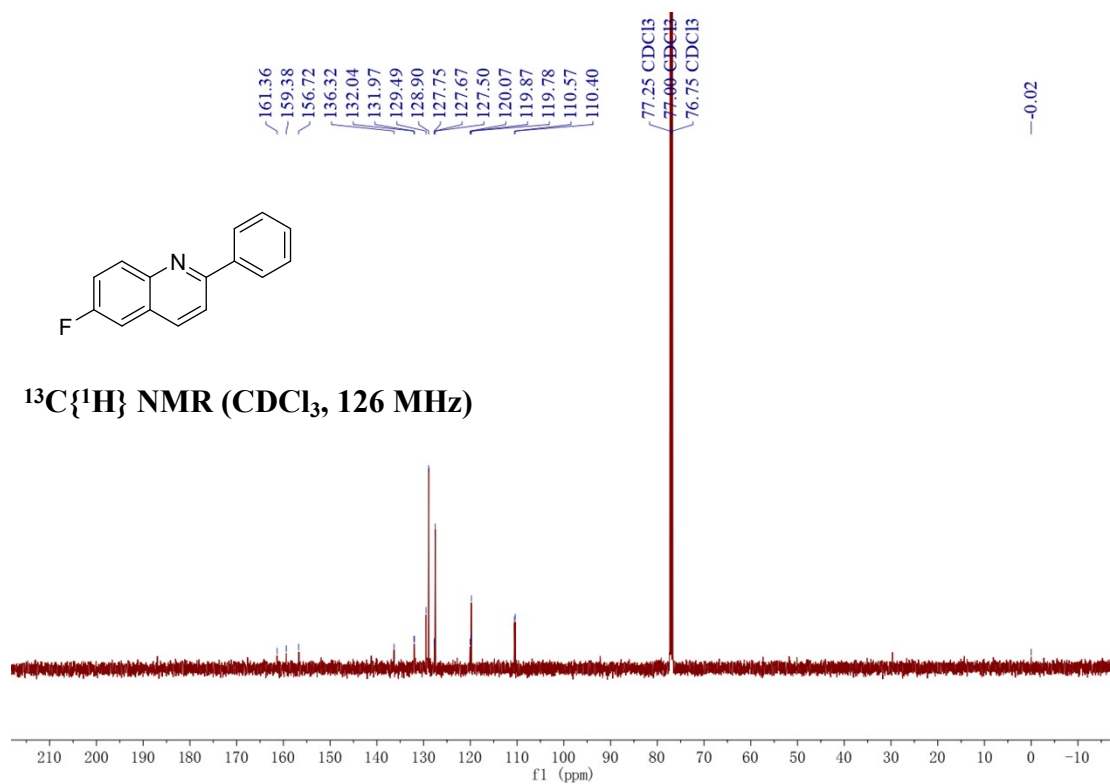

### $^{19}\text{F}$ NMR Spectrum of Compound c12-1

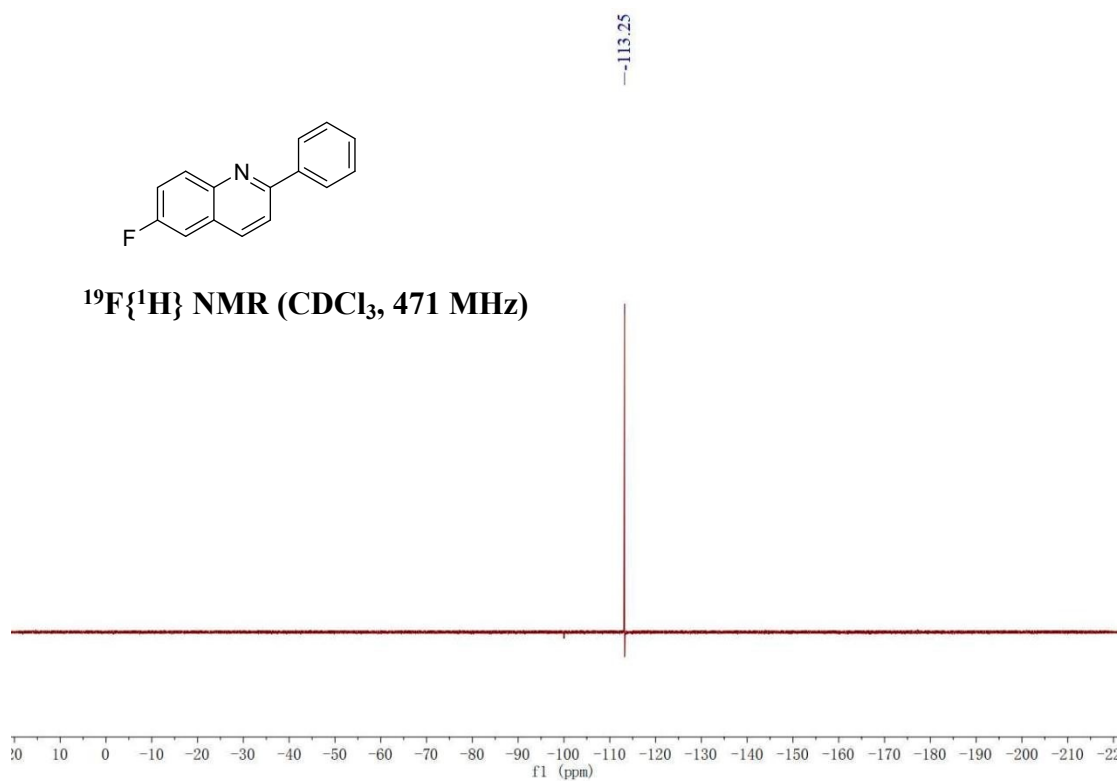

## <sup>1</sup>H NMR Spectrum of Compound c12-2

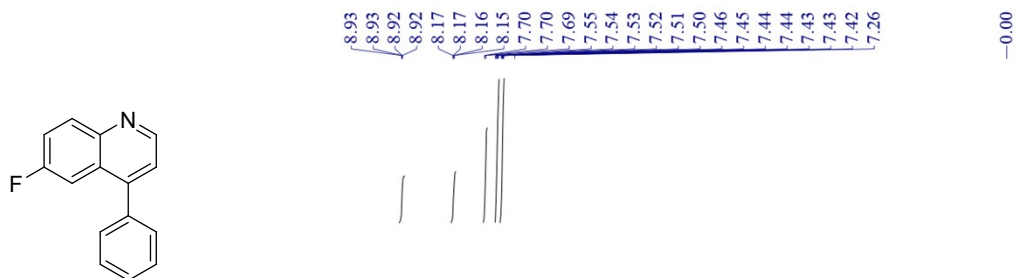

<sup>1</sup>H NMR (CDCl<sub>3</sub>, 500 MHz)

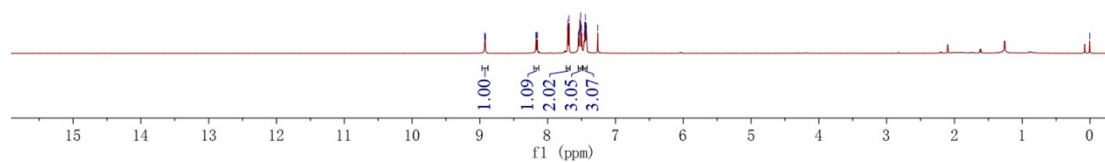

## <sup>13</sup>C{<sup>1</sup>H} NMR Spectrum of Compound c12-2

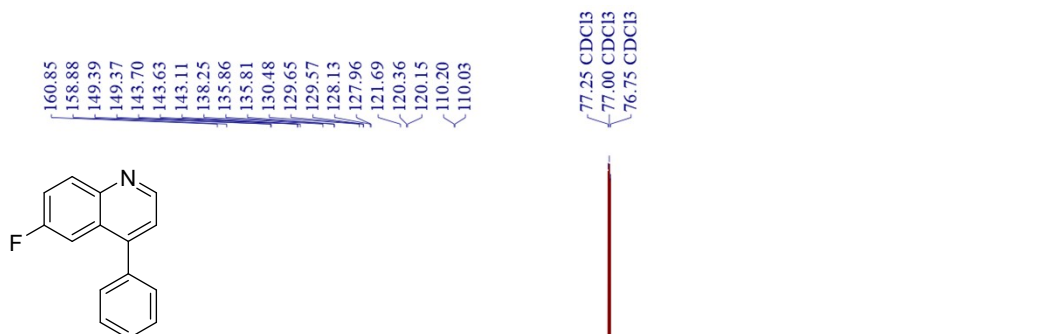

<sup>13</sup>C{<sup>1</sup>H} NMR (CDCl<sub>3</sub>, 126 MHz)

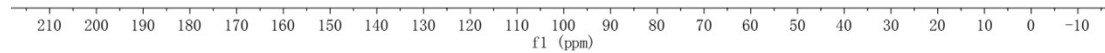

### <sup>1</sup>H NMR Spectrum of Compound c13

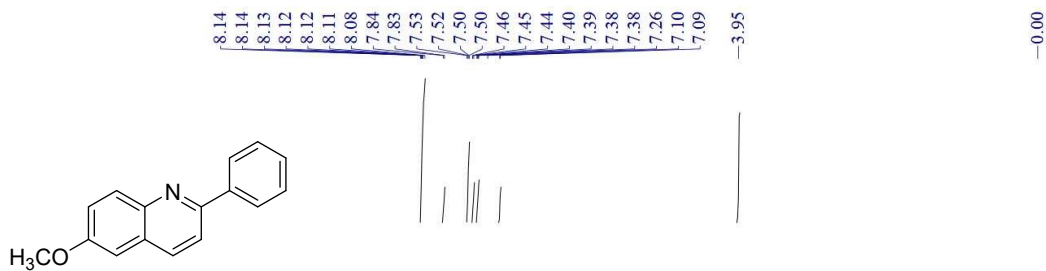

<sup>1</sup>H NMR (CDCl<sub>3</sub>, 500 MHz)

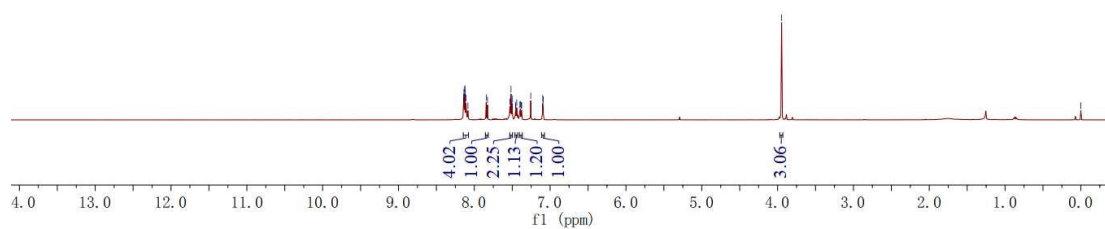

### <sup>13</sup>C{<sup>1</sup>H} NMR Spectrum of Compound c13

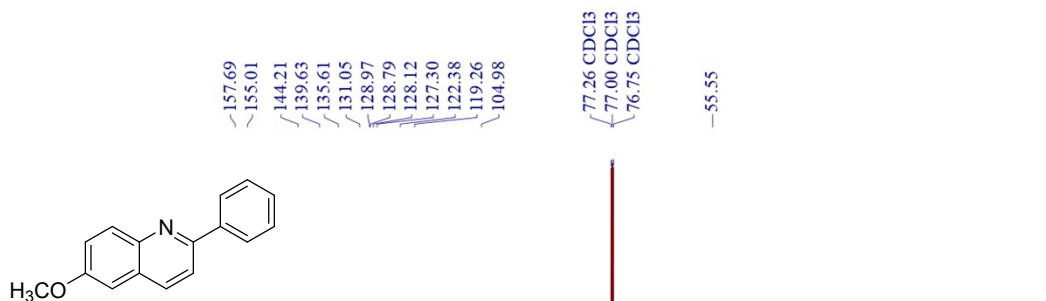

<sup>13</sup>C{<sup>1</sup>H} NMR (CDCl<sub>3</sub>, 126 MHz)

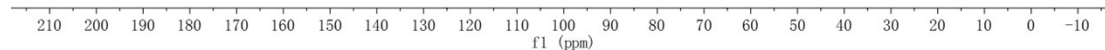

## $^1\text{H}$ NMR Spectrum of Compound c14

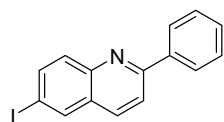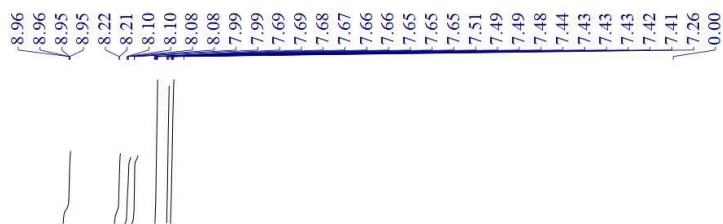

$^1\text{H}$  NMR ( $\text{CDCl}_3$ , 500 MHz)

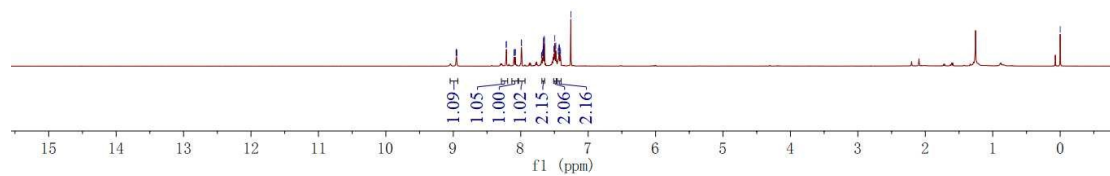

## $^{13}\text{C}\{^1\text{H}\}$ NMR Spectrum of Compound c14

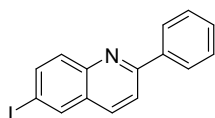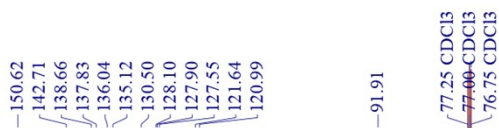

$^{13}\text{C}\{^1\text{H}\}$  NMR ( $\text{CDCl}_3$ , 126 MHz)

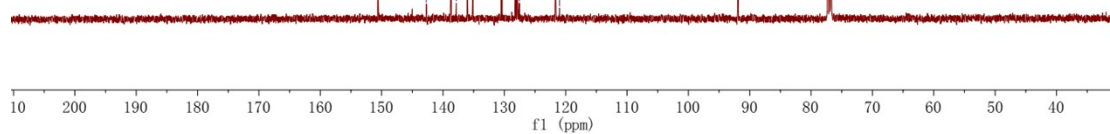

# <sup>1</sup>H NMR Spectrum of Compound c15

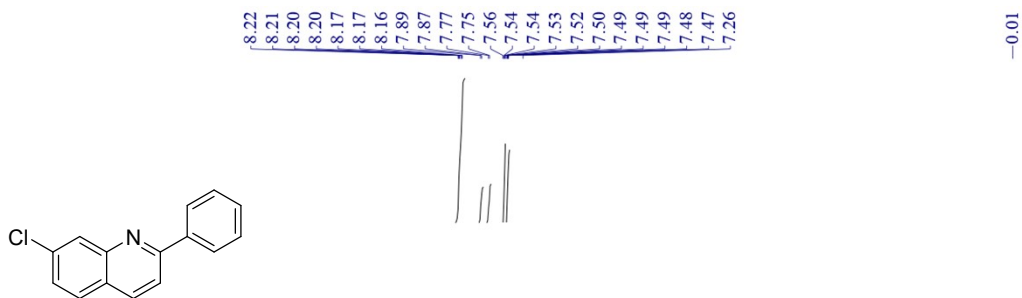

## <sup>1</sup>H NMR (CDCl<sub>3</sub>, 500 MHz)

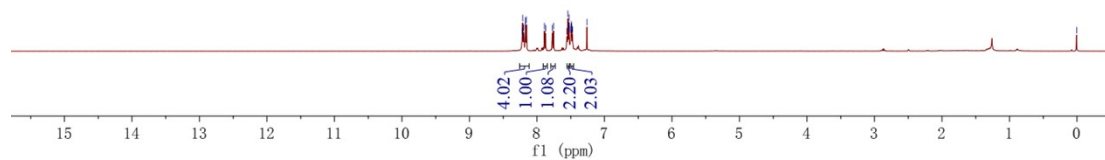

# <sup>13</sup>C{<sup>1</sup>H} NMR Spectrum of Compound c15

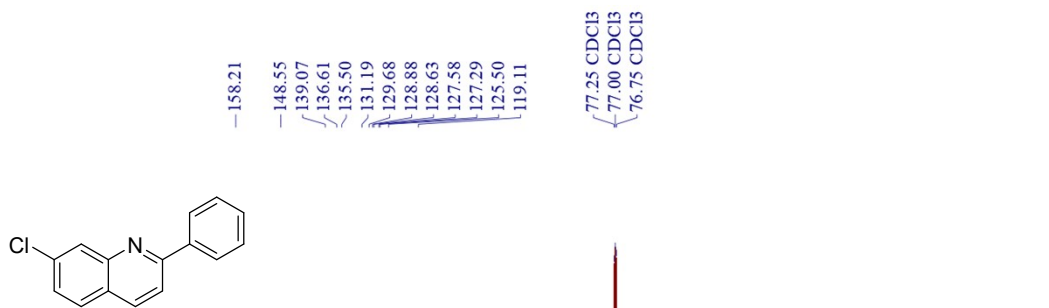

## <sup>13</sup>C{<sup>1</sup>H} NMR (CDCl<sub>3</sub>, 126 MHz)

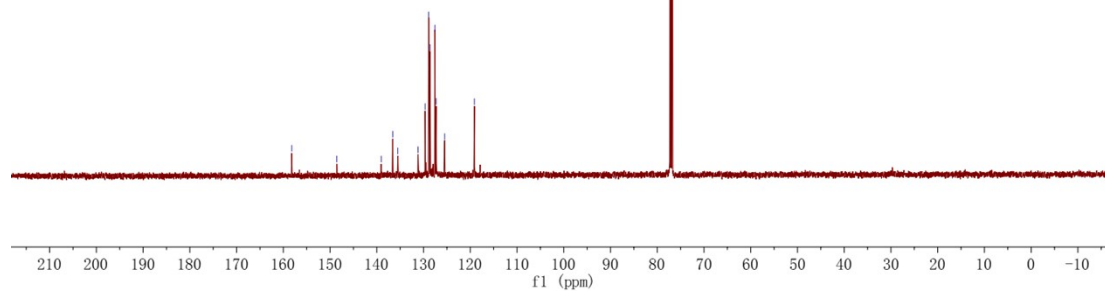

### <sup>1</sup>H NMR Spectrum of Compound c16

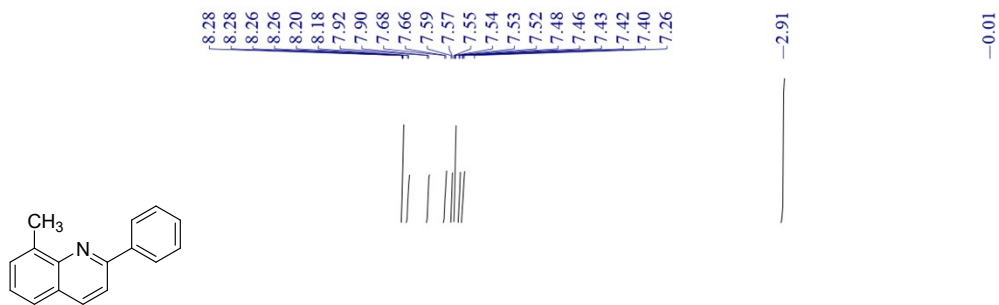

<sup>1</sup>H NMR (CDCl<sub>3</sub>, 500 MHz)

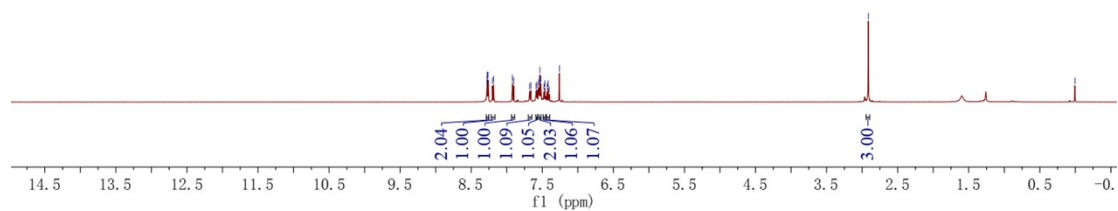

### <sup>13</sup>C{<sup>1</sup>H} NMR Spectrum of Compound c16

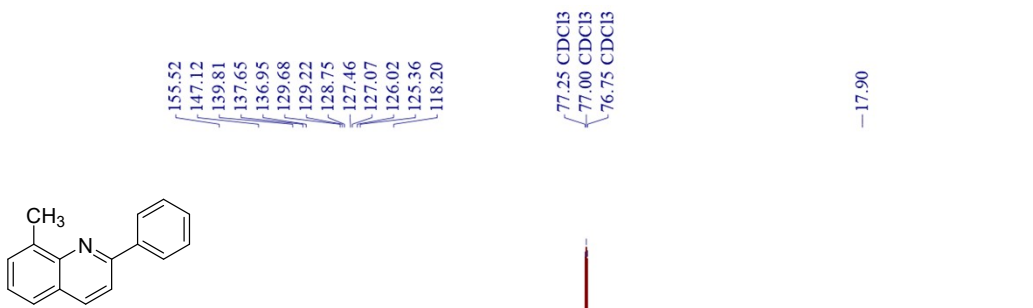

<sup>13</sup>C{<sup>1</sup>H} NMR (CDCl<sub>3</sub>, 126 MHz)

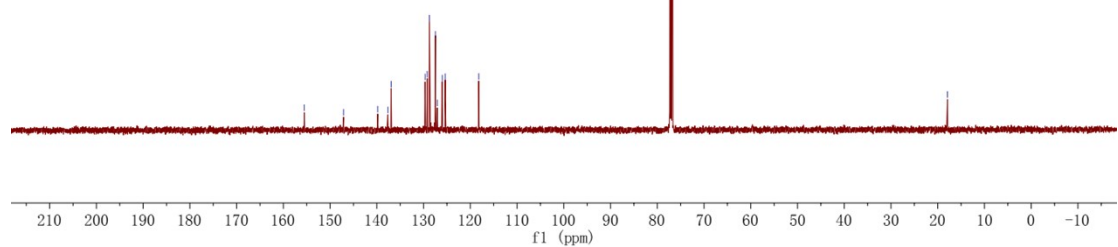



# <sup>1</sup>H NMR Spectrum of Compound c17

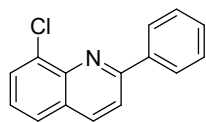

9.11  
9.10  
9.08  
9.08  
9.07  
8.28  
8.28  
8.27  
8.26  
7.91  
7.89  
7.87  
7.53  
7.53  
7.52  
7.50  
7.49  
7.45  
7.44  
7.43  
7.43  
7.26

-0.00

## <sup>1</sup>H NMR (CDCl<sub>3</sub>, 500 MHz)

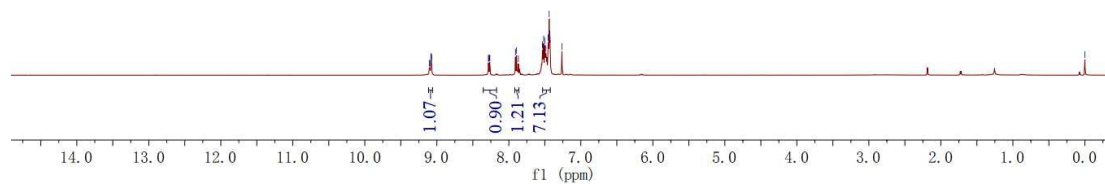

## <sup>13</sup>C{<sup>1</sup>H} NMR Spectrum of Compound c17

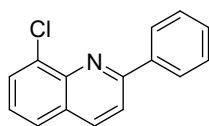

150.64  
144.39  
139.81  
138.47  
135.23  
129.95  
129.50  
129.12  
128.58  
127.98  
127.14  
126.46  
125.21  
121.78

77.25 CDCl<sub>3</sub>  
77.00 CDCl<sub>3</sub>  
76.75 CDCl<sub>3</sub>

## <sup>13</sup>C{<sup>1</sup>H} NMR (CDCl<sub>3</sub>, 126 MHz)

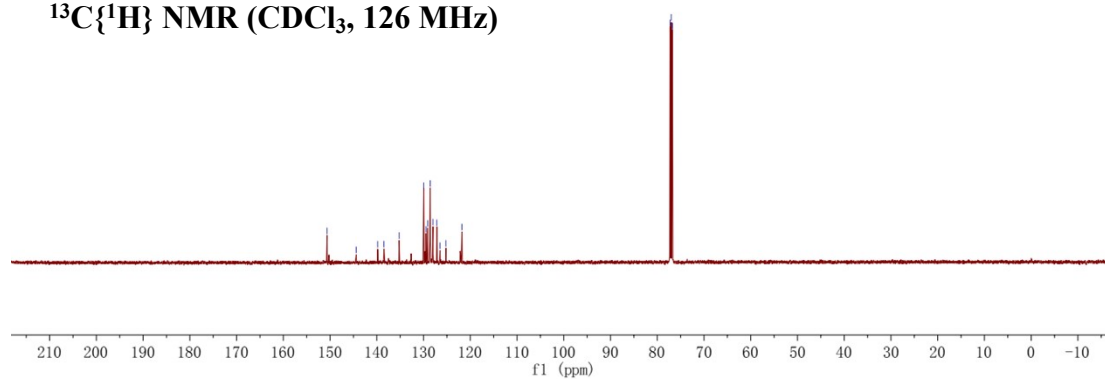

# <sup>1</sup>H NMR Spectrum of Compound c18

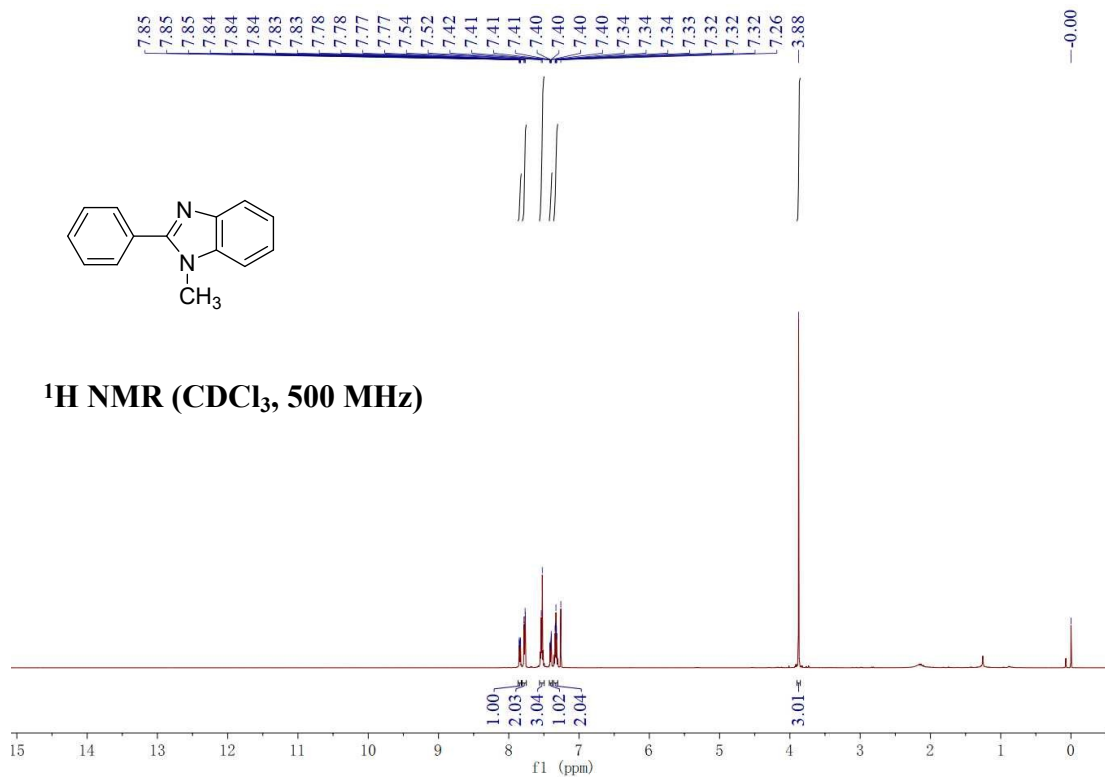

# <sup>13</sup>C{<sup>1</sup>H} NMR Spectrum of Compound c18

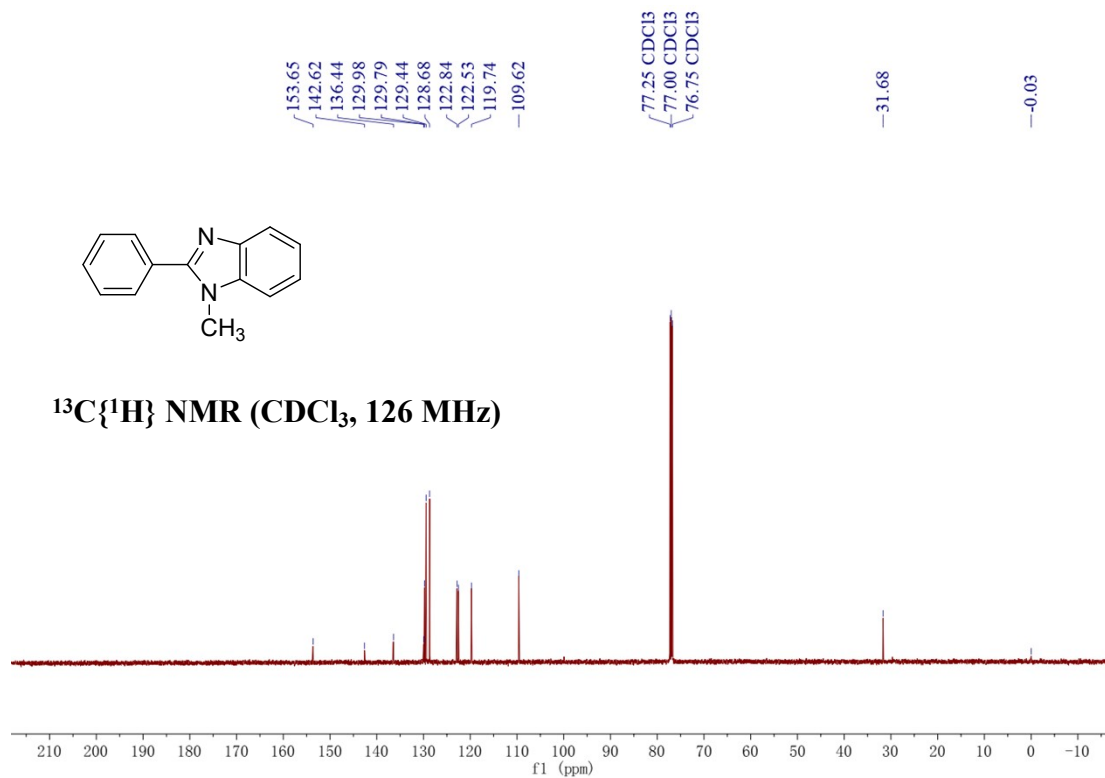

### $^1\text{H}$ NMR Spectrum of Compound c19

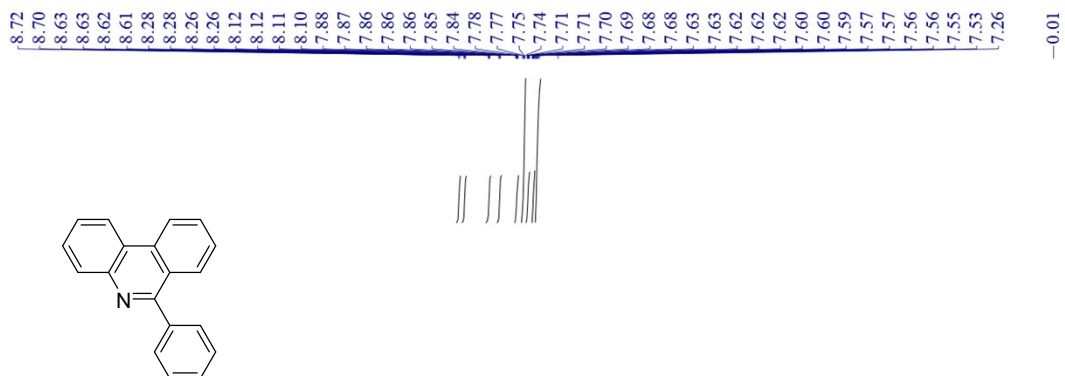

$^1\text{H}$  NMR ( $\text{CDCl}_3$ , 500 MHz)

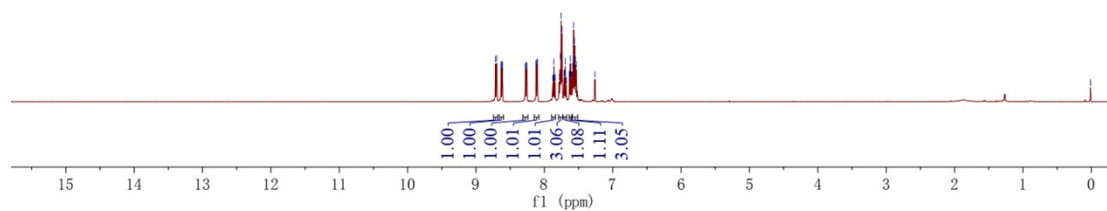

### $^{13}\text{C}\{^1\text{H}\}$ NMR Spectrum of Compound c19

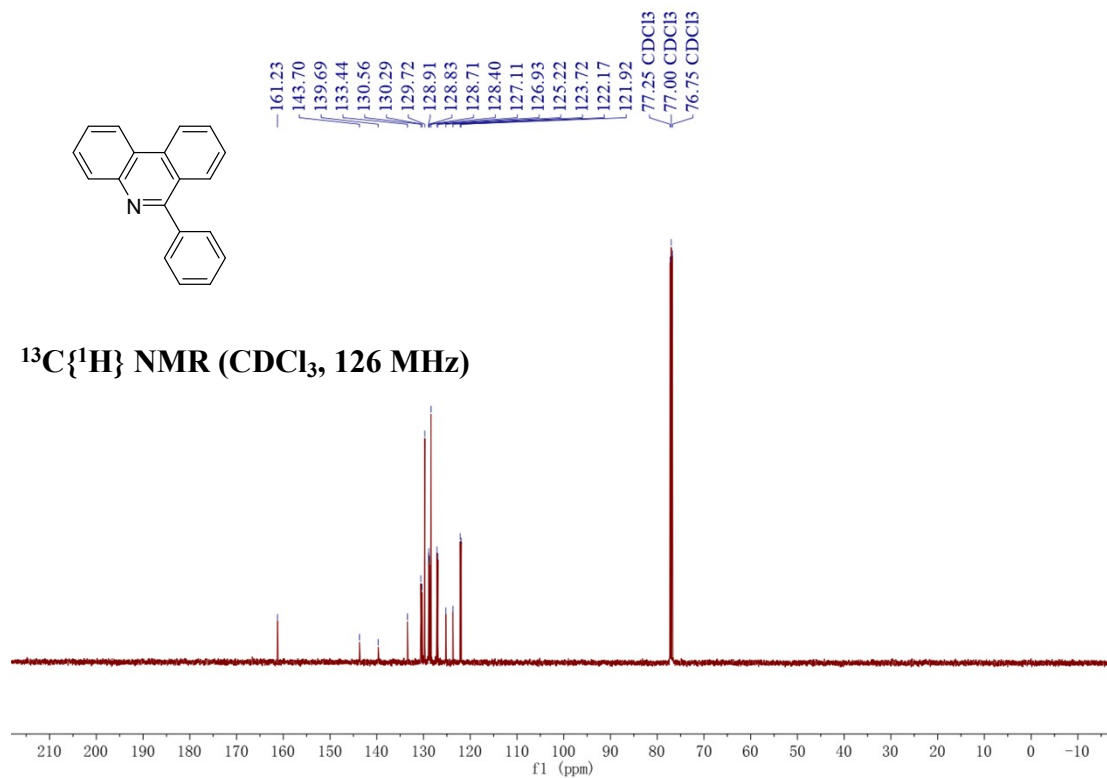

$^{13}\text{C}\{^1\text{H}\}$  NMR ( $\text{CDCl}_3$ , 126 MHz)

# <sup>1</sup>H NMR Spectrum of Compound c20

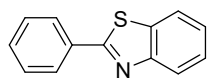

<sup>1</sup>H NMR (CDCl<sub>3</sub>, 500 MHz)

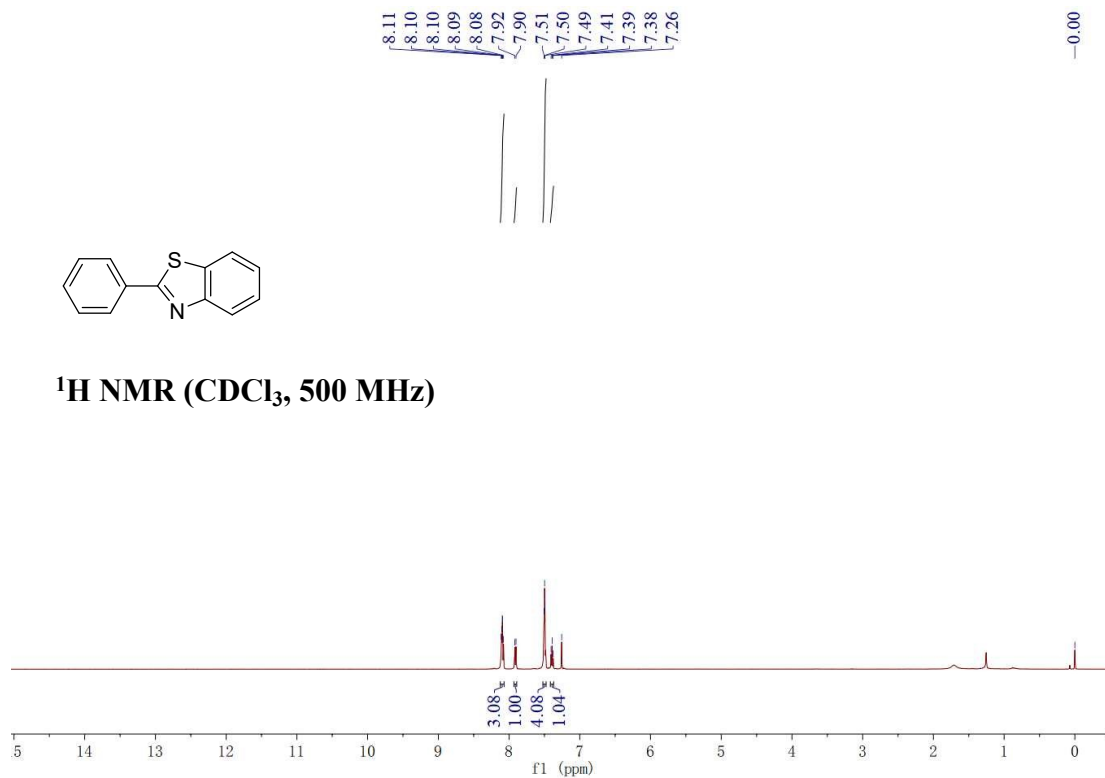

# <sup>13</sup>C{<sup>1</sup>H} NMR Spectrum of Compound c20

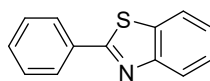

<sup>13</sup>C{<sup>1</sup>H} NMR (CDCl<sub>3</sub>, 126 MHz)

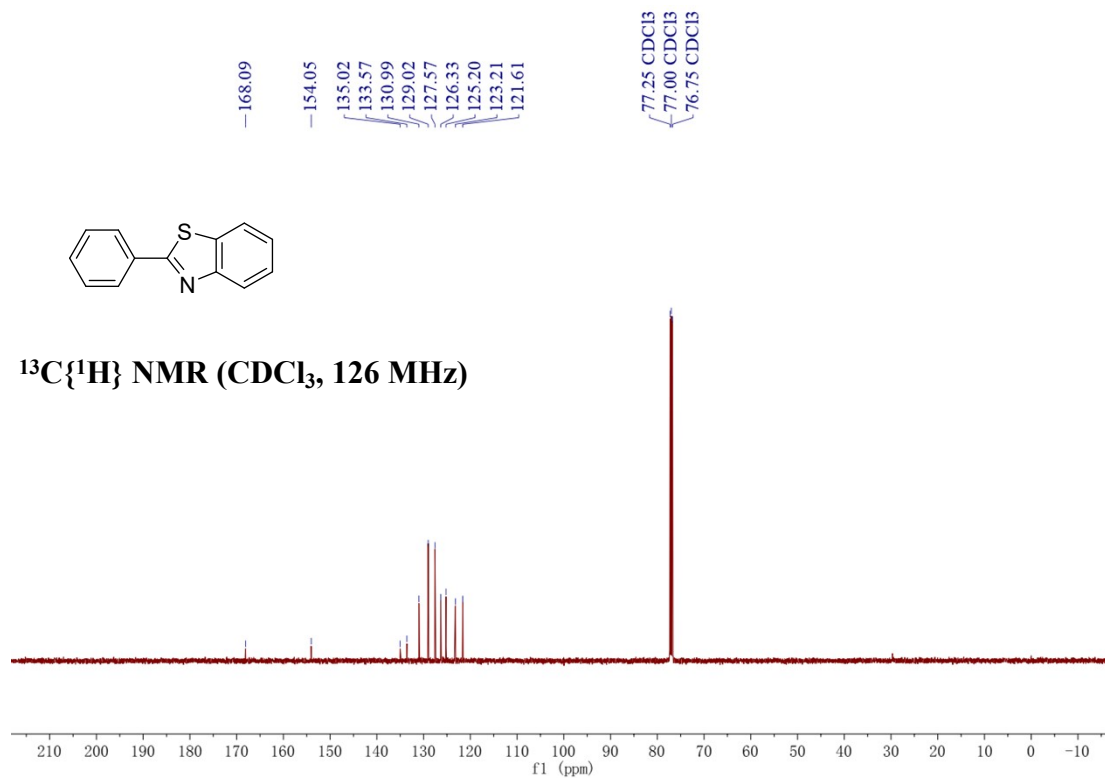

## <sup>1</sup>H NMR Spectrum of Compound c21

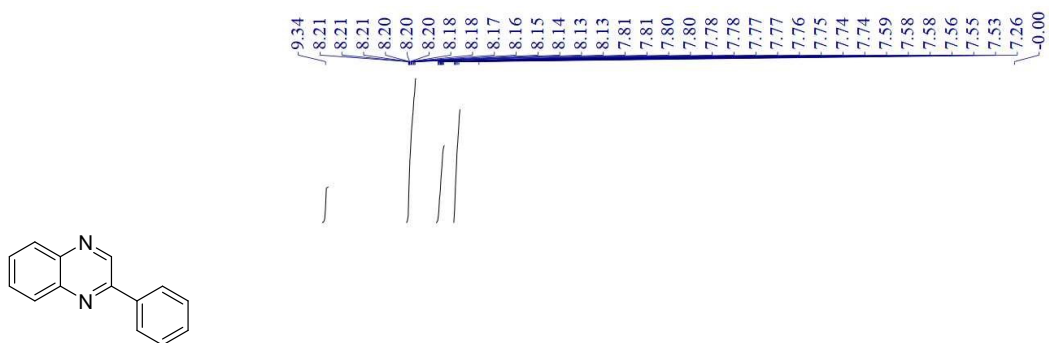

<sup>1</sup>H NMR (CDCl<sub>3</sub>, 500 MHz)

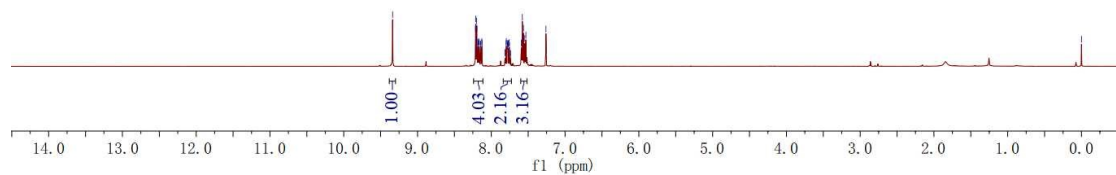

## <sup>13</sup>C{<sup>1</sup>H} NMR Spectrum of Compound c21

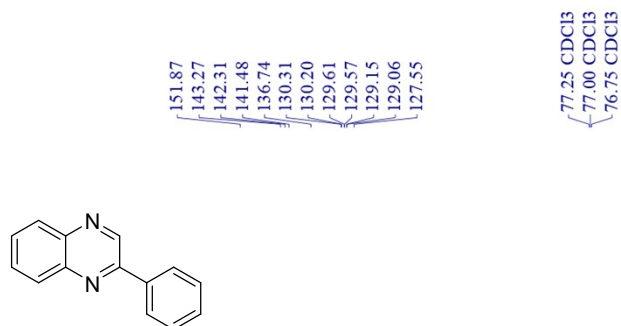

<sup>13</sup>C{<sup>1</sup>H} NMR (CDCl<sub>3</sub>, 126 MHz)

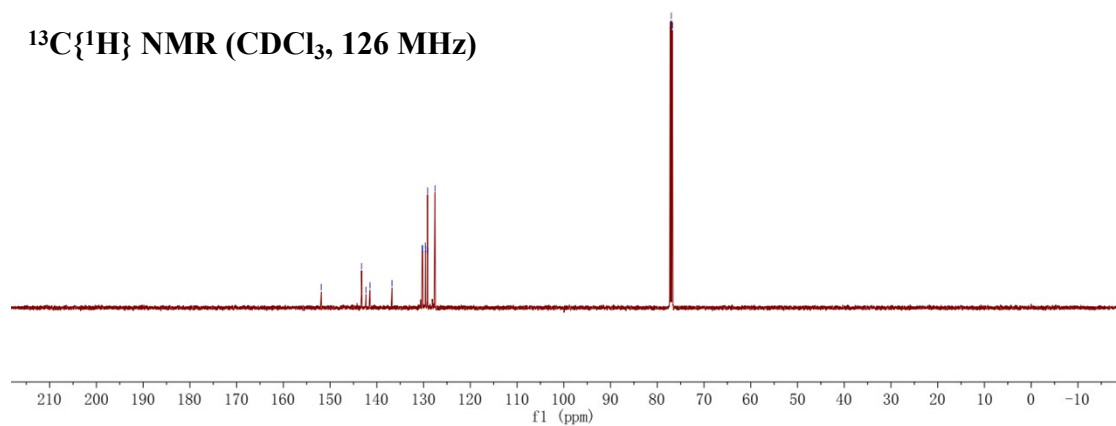

# <sup>1</sup>H NMR Spectrum of Compound c22

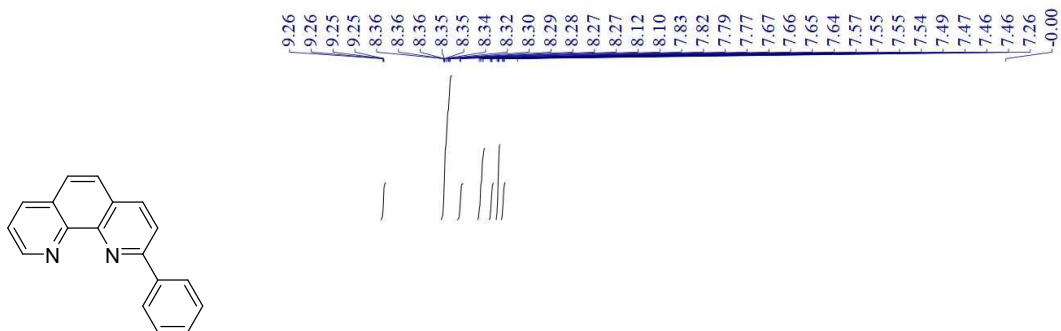

## <sup>1</sup>H NMR (CDCl<sub>3</sub>, 500 MHz)

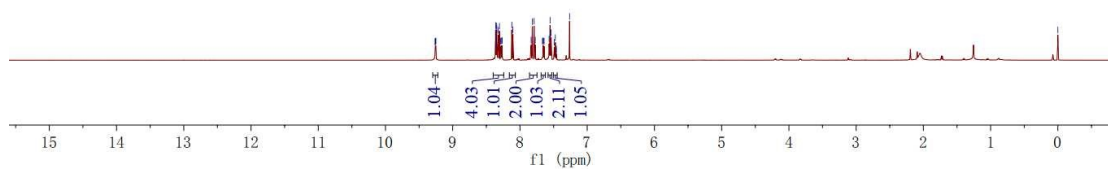

# <sup>13</sup>C{<sup>1</sup>H} NMR Spectrum of Compound c22

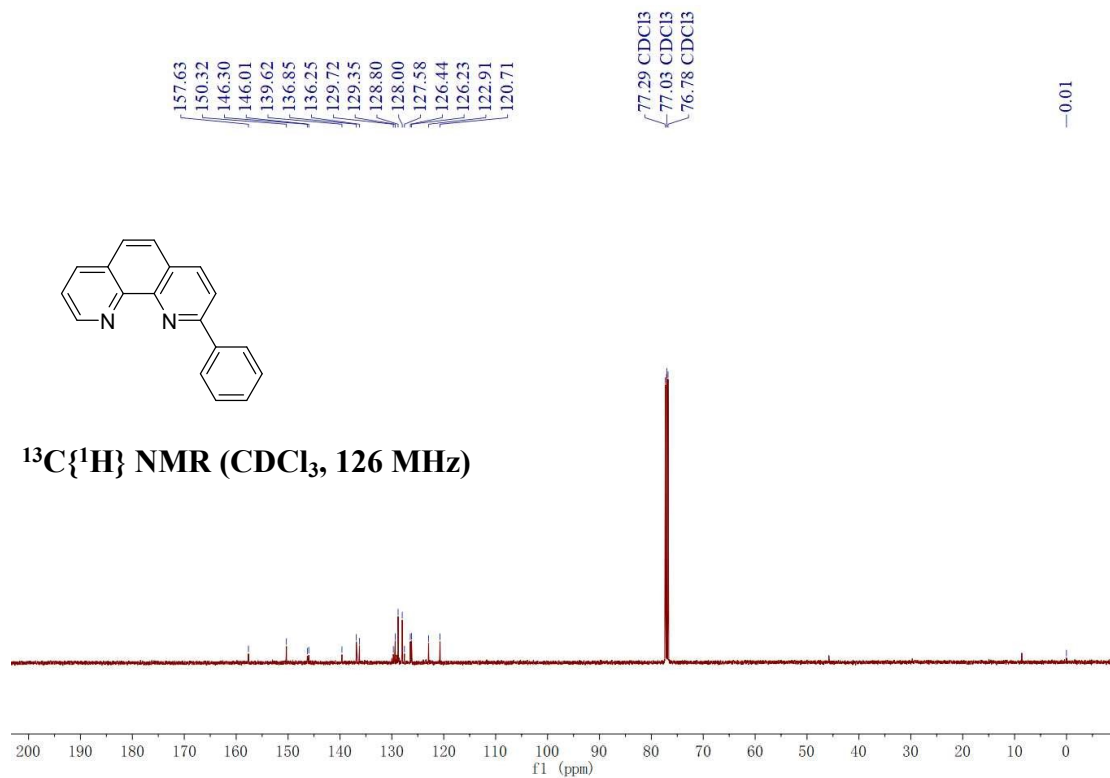

## <sup>13</sup>C{<sup>1</sup>H} NMR (CDCl<sub>3</sub>, 126 MHz)

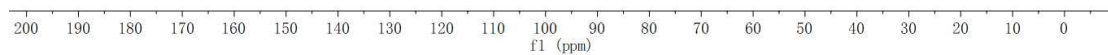

## $^1\text{H}$ NMR Spectrum of Compound c23

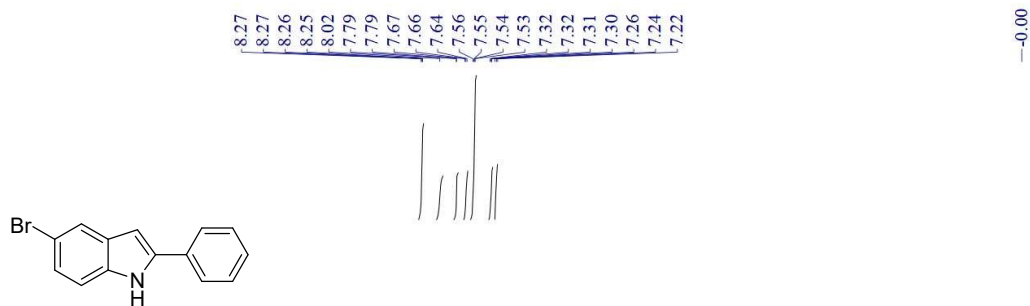

$^1\text{H}$  NMR (CDCl<sub>3</sub>, 500 MHz)

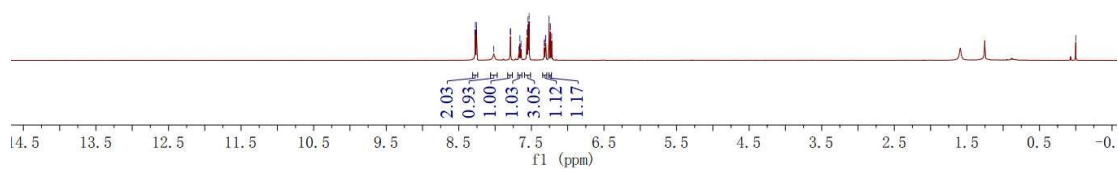

## $^{13}\text{C}\{^1\text{H}\}$ NMR Spectrum of Compound c23

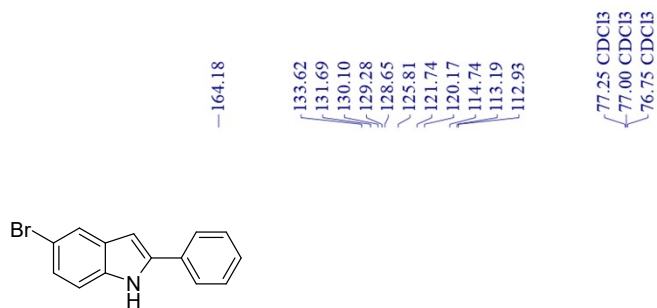

$^{13}\text{C}\{^1\text{H}\}$  NMR (CDCl<sub>3</sub>, 126 MHz)

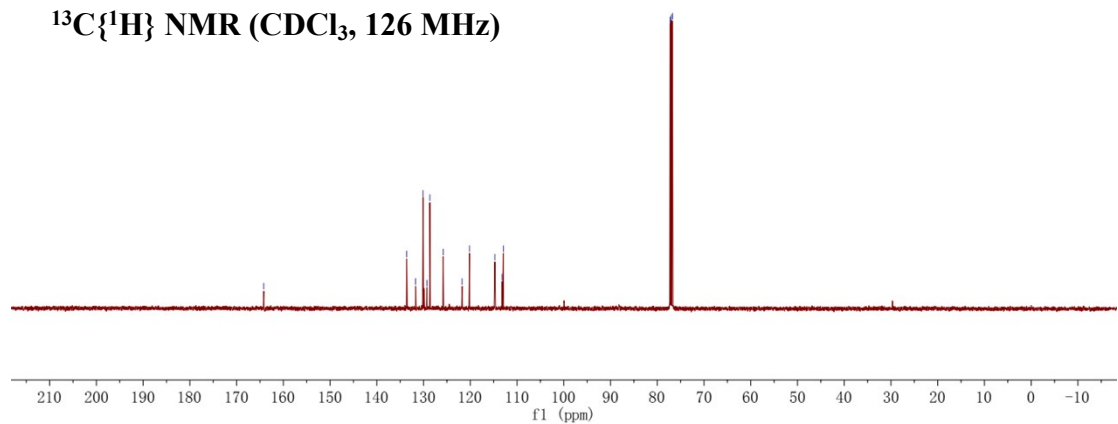

### $^1\text{H}$ NMR Spectrum of Compound c24

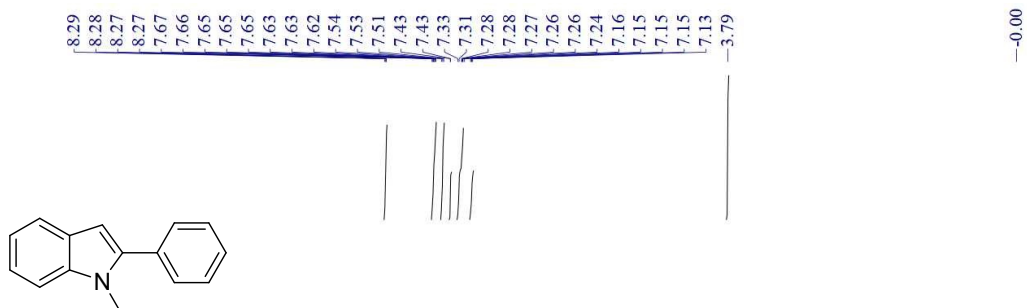

$^1\text{H}$  NMR ( $\text{CDCl}_3$ , 500 MHz)

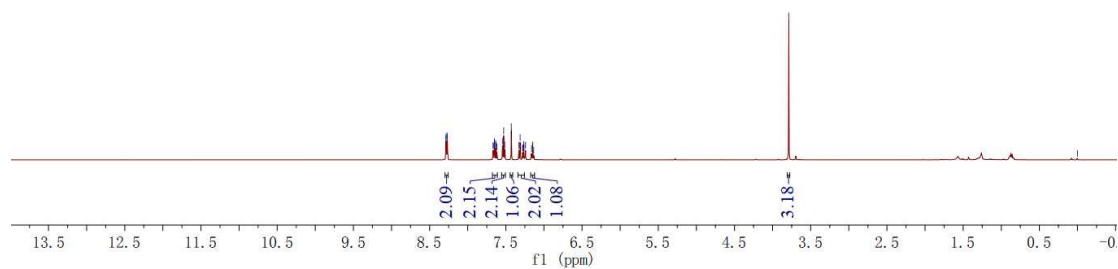

### $^{13}\text{C}\{^1\text{H}\}$ NMR Spectrum of Compound c24

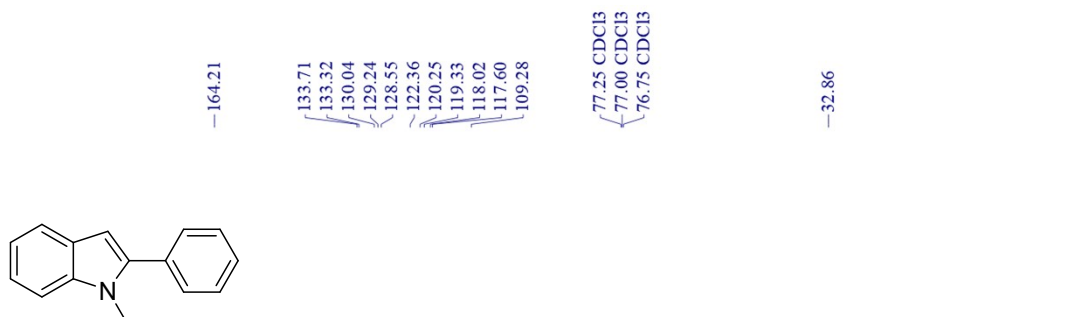

$^{13}\text{C}\{^1\text{H}\}$  NMR ( $\text{CDCl}_3$ , 126 MHz)

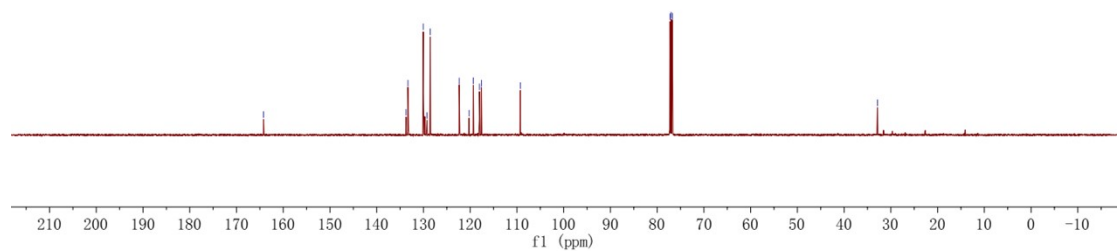



## $^1\text{H}$ NMR Spectrum of Compound c25

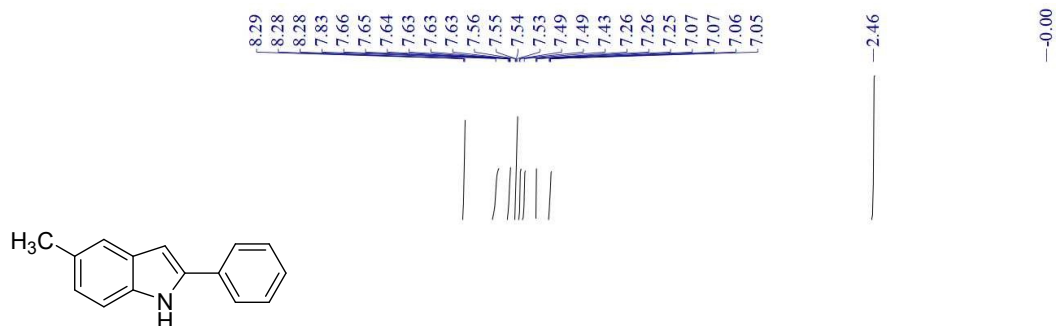

## $^1\text{H}$ NMR (CDCl<sub>3</sub>, 500 MHz)

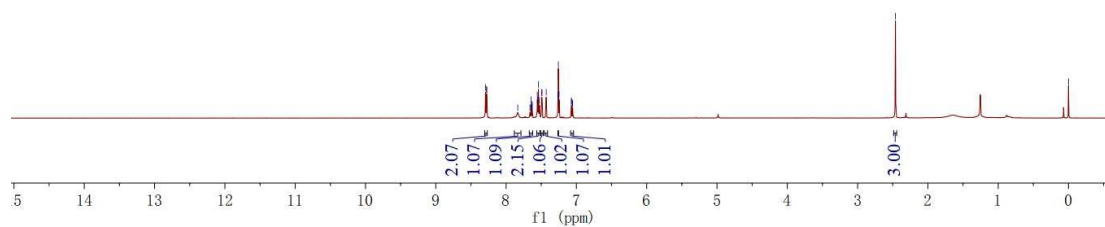

## $^{13}\text{C}\{^1\text{H}\}$ NMR Spectrum of Compound c25

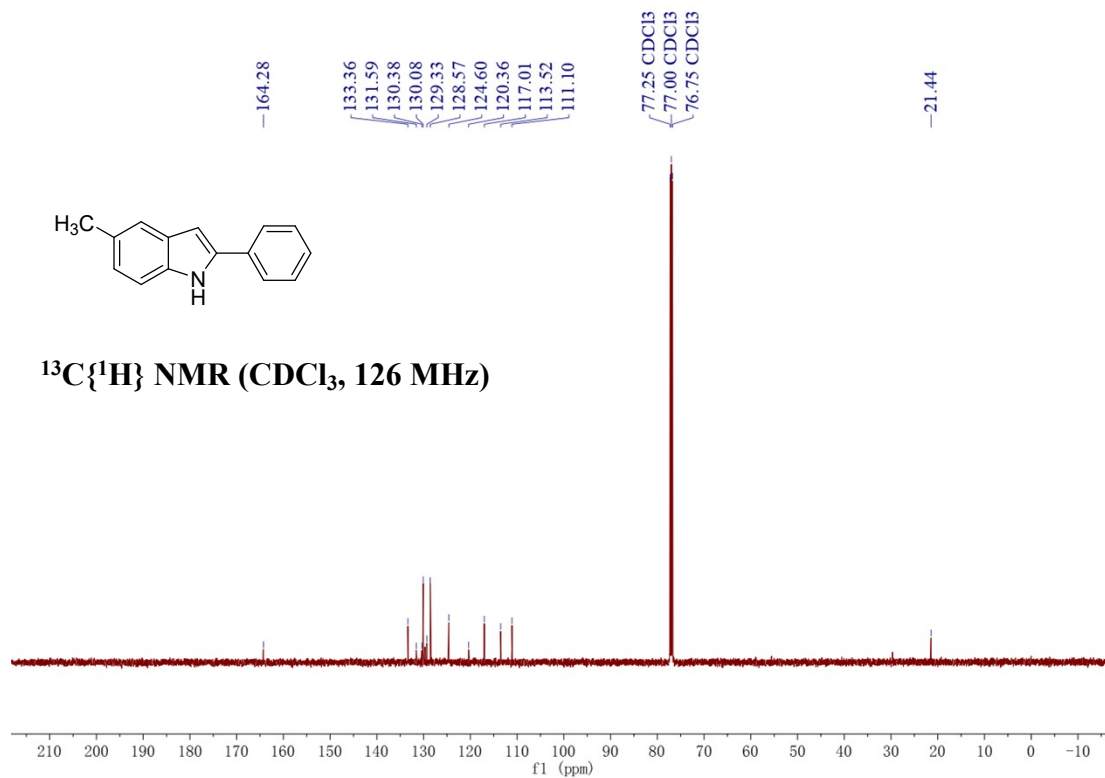

# <sup>1</sup>H NMR Spectrum of Compound c26

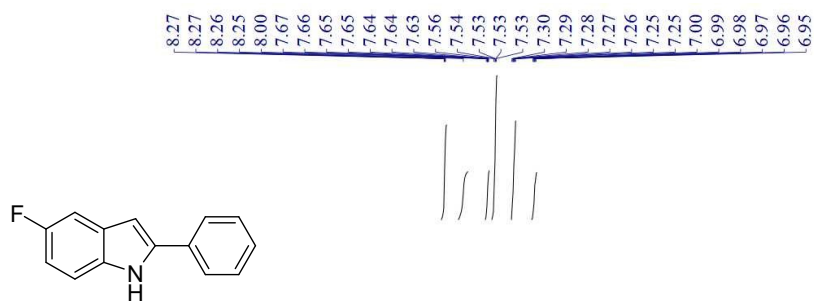

## <sup>1</sup>H NMR (CDCl<sub>3</sub>, 500 MHz)

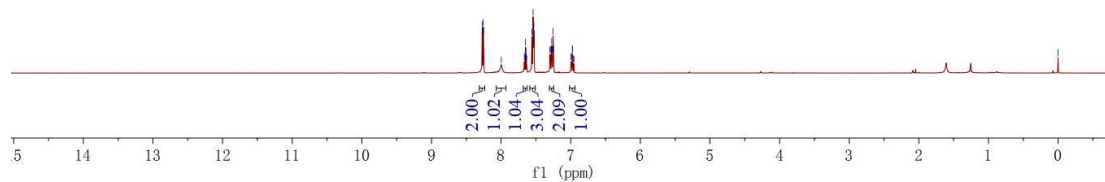

# <sup>13</sup>C{<sup>1</sup>H} NMR Spectrum of Compound c26

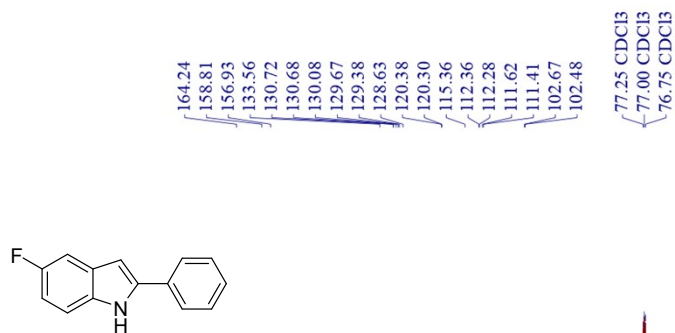

## <sup>13</sup>C{<sup>1</sup>H} NMR (CDCl<sub>3</sub>, 126 MHz)

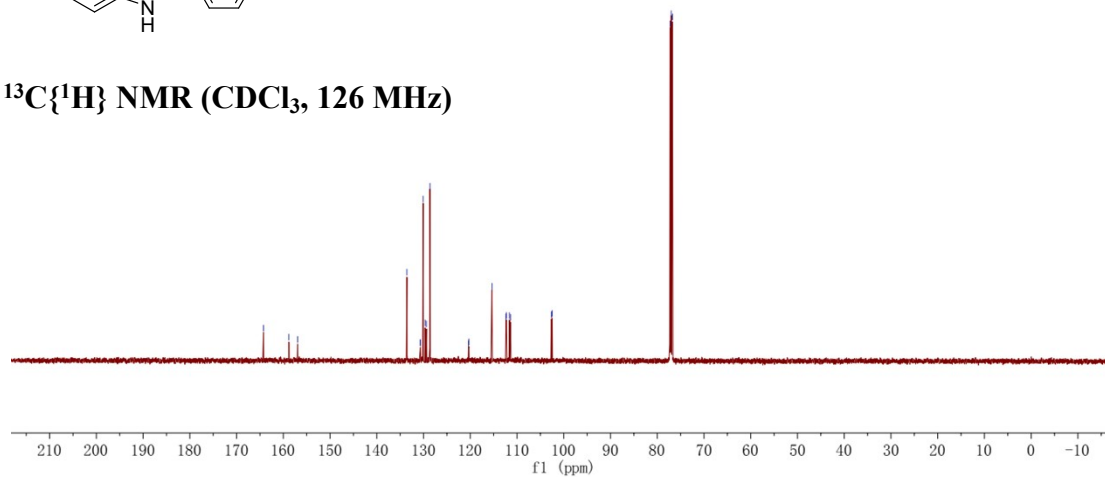

## $^{19}\text{F}\{^1\text{H}\}$ NMR Spectrum of Compound c26

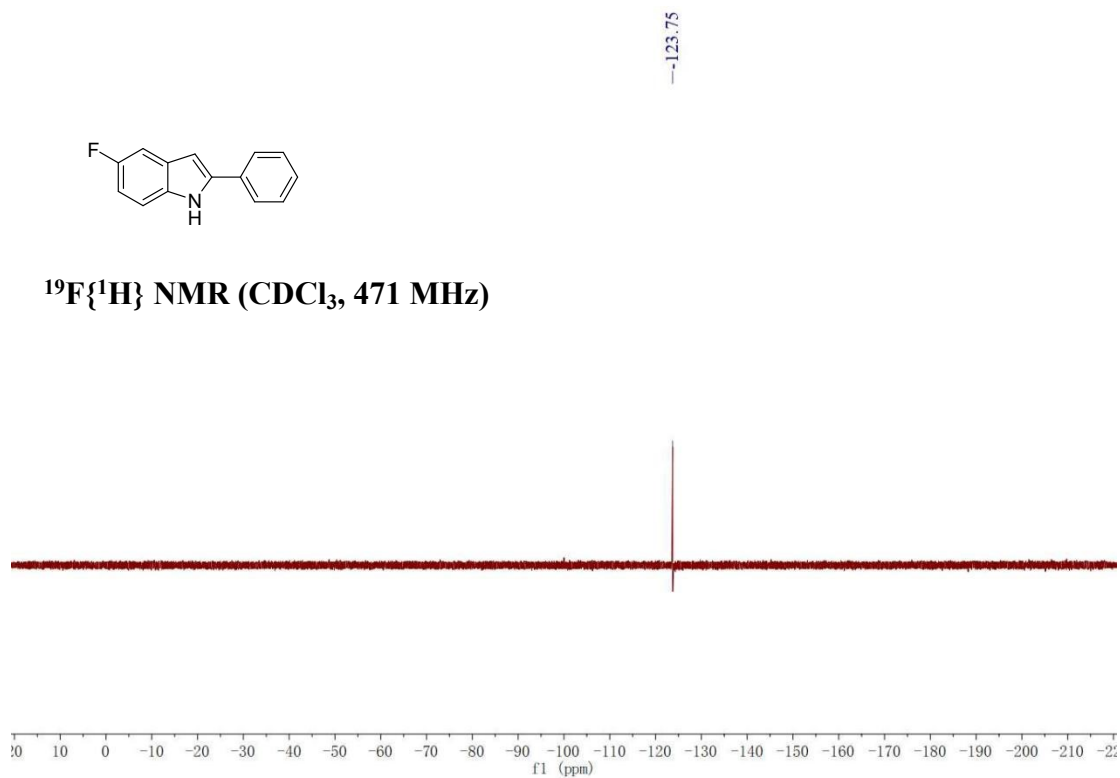

## $^1\text{H}$ NMR Spectrum of Compound c27

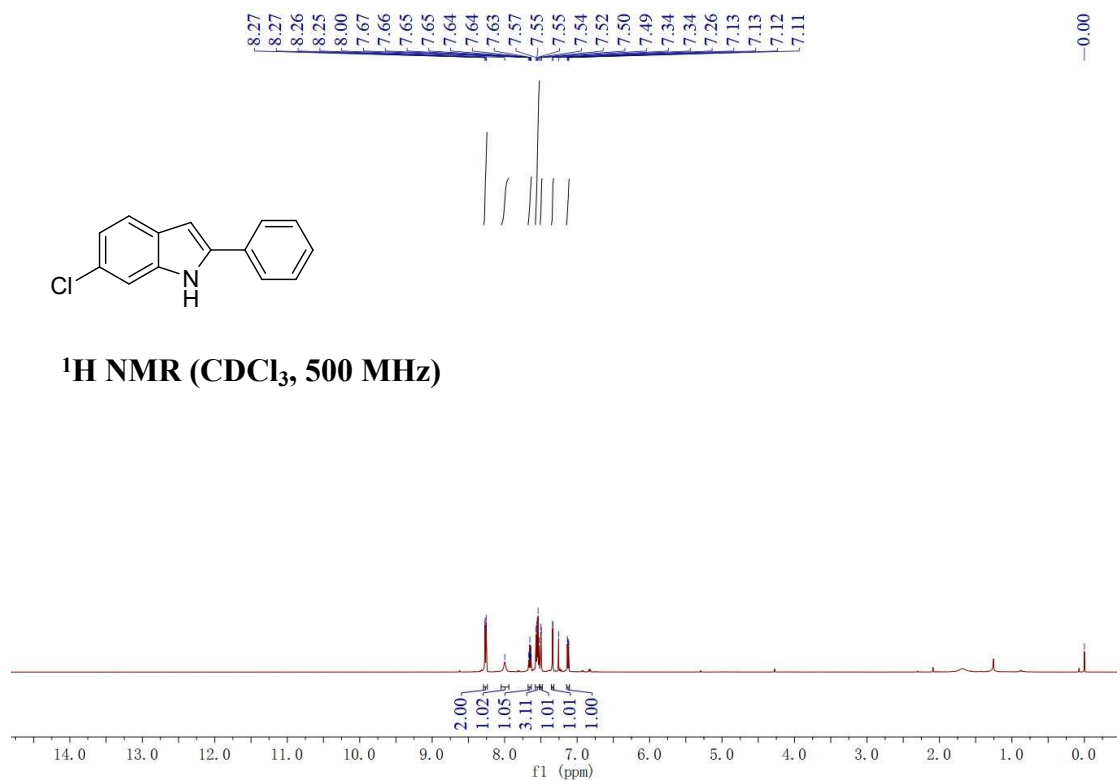

### $^{13}\text{C}\{^1\text{H}\}$ NMR Spectrum of Compound c27

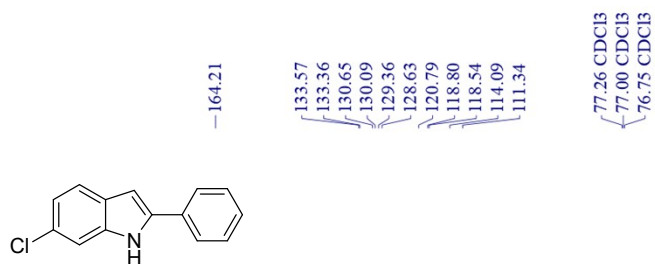

### $^{13}\text{C}\{^1\text{H}\}$ NMR (CDCl<sub>3</sub>, 126 MHz)

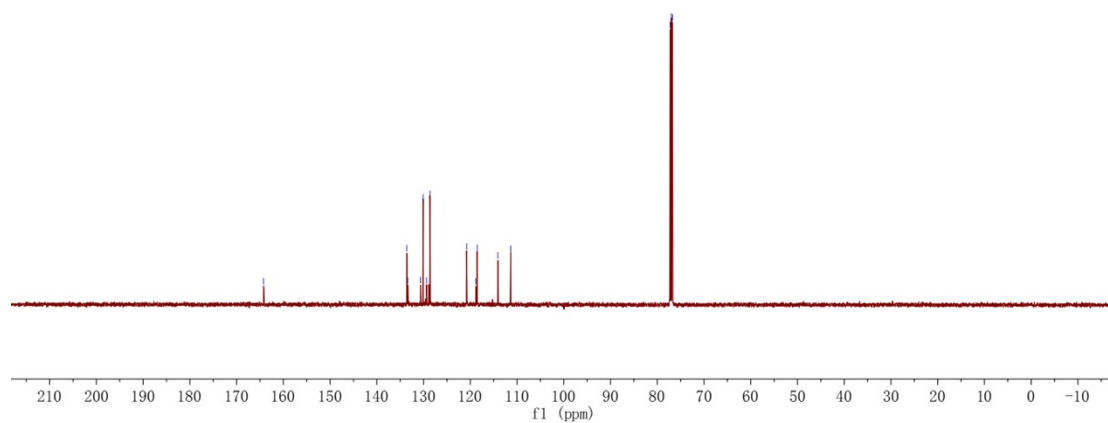

### $^1\text{H}$ NMR Spectrum of Compound c28

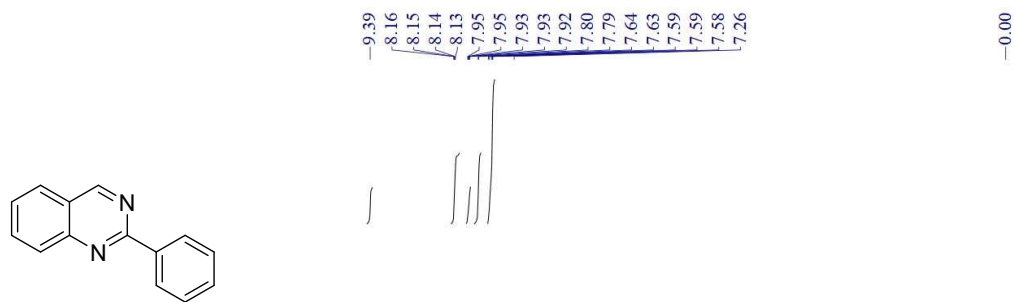

### $^1\text{H}$ NMR (CDCl<sub>3</sub>, 500 MHz)

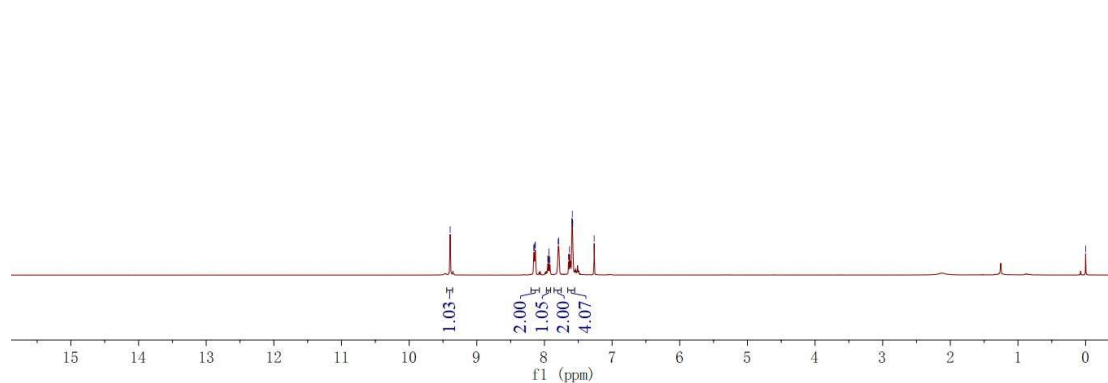

### $^{13}\text{C}\{^1\text{H}\}$ NMR Spectrum of Compound c28

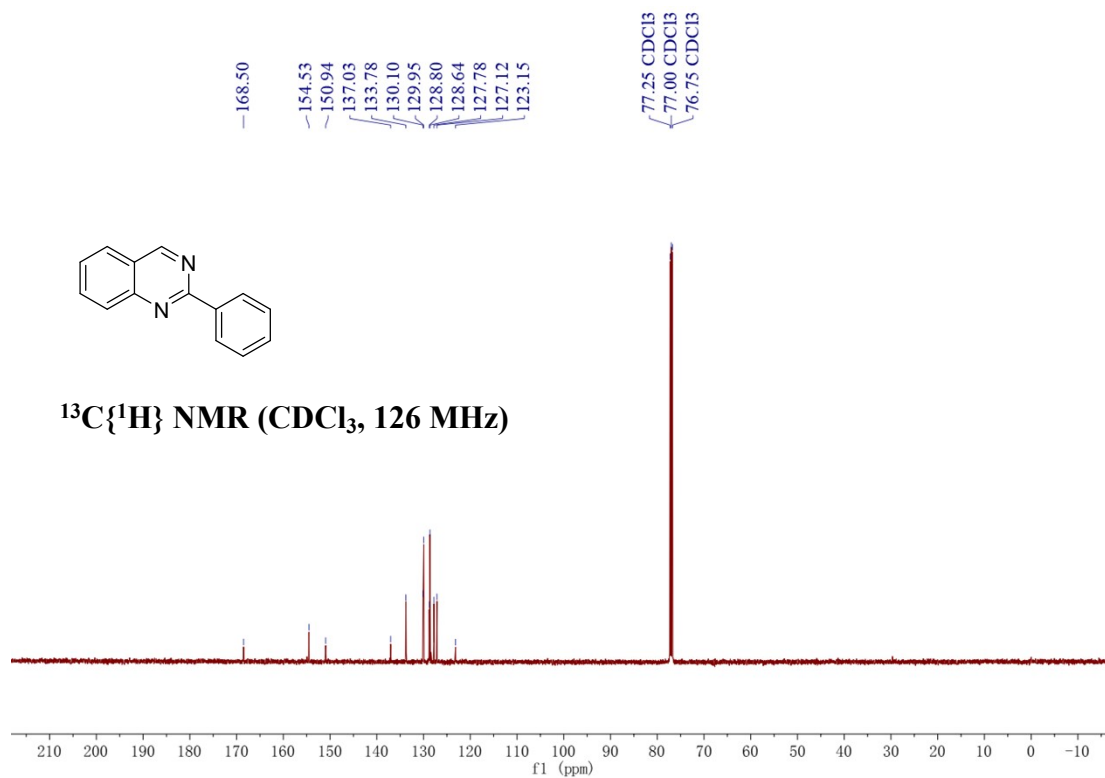

### $^1\text{H}$ NMR Spectrum of Compound c29

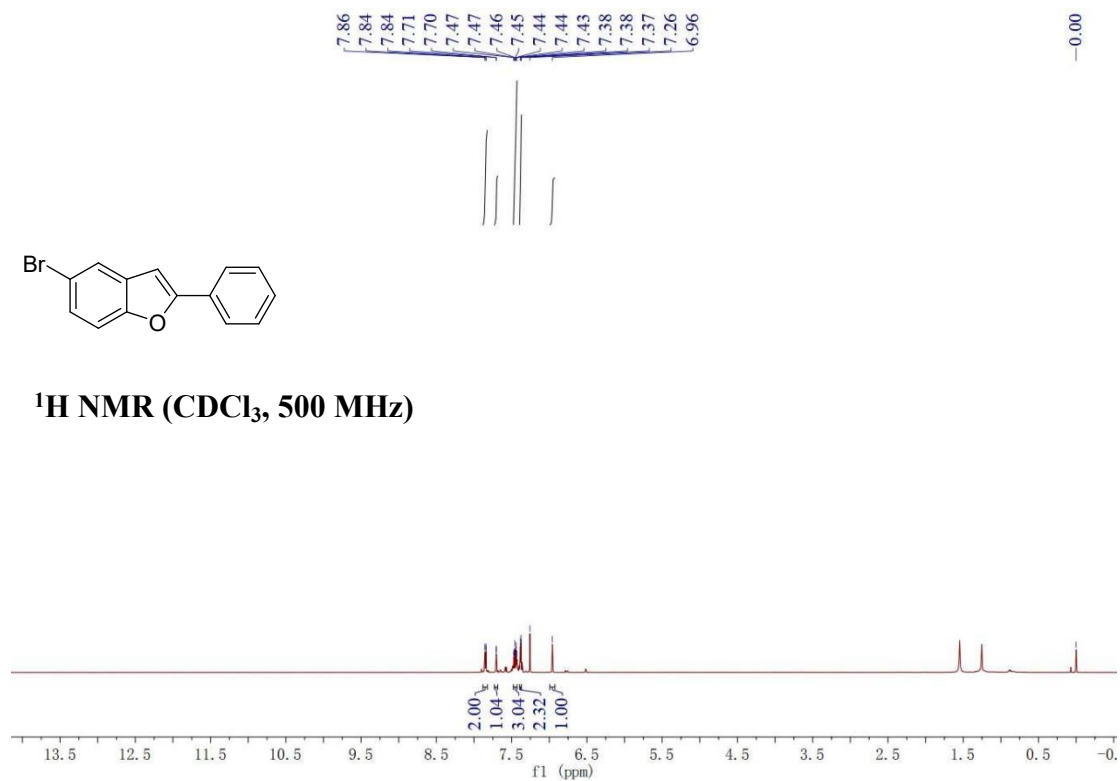

### $^{13}\text{C}\{^1\text{H}\}$ NMR Spectrum of Compound c29

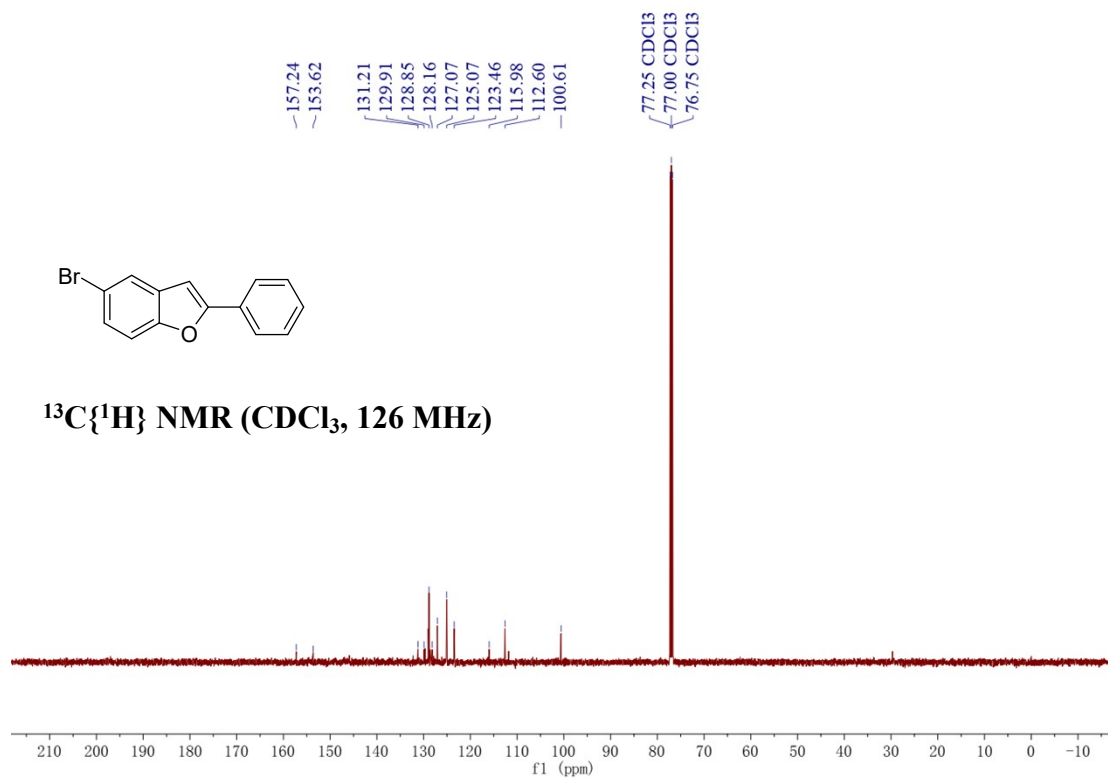

### $^1\text{H}$ NMR Spectrum of Compound c30

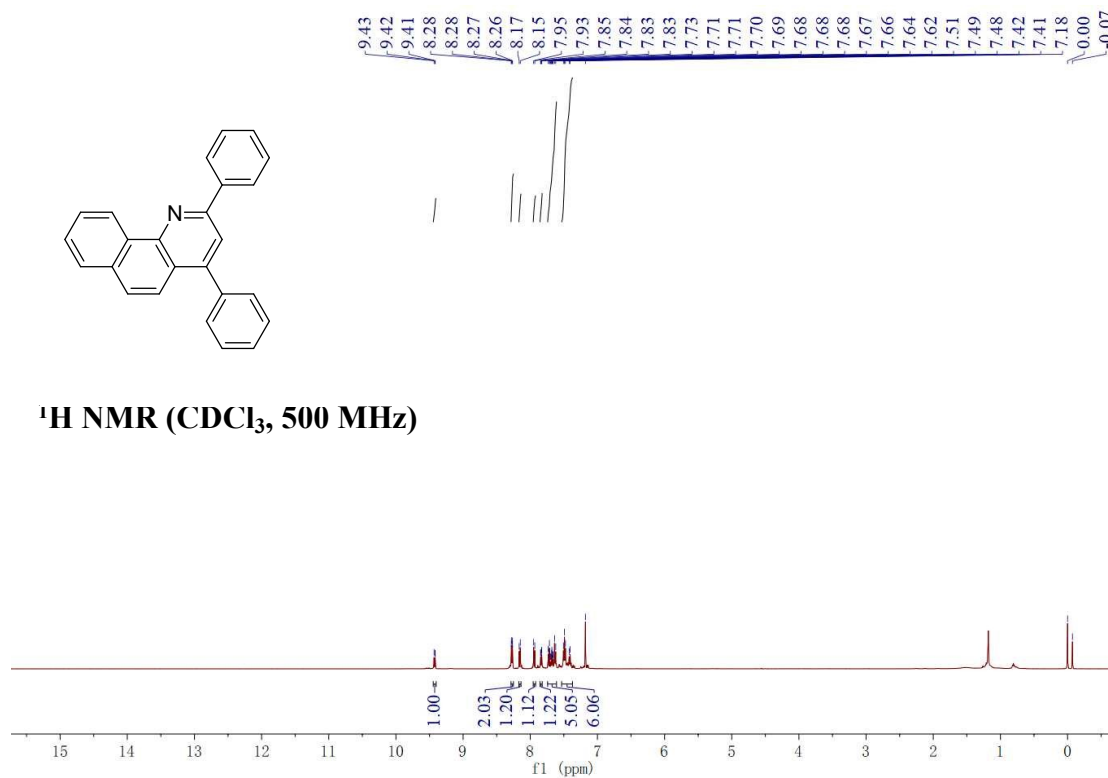

### $^{13}\text{C}\{^1\text{H}\}$ NMR Spectrum of Compound c30

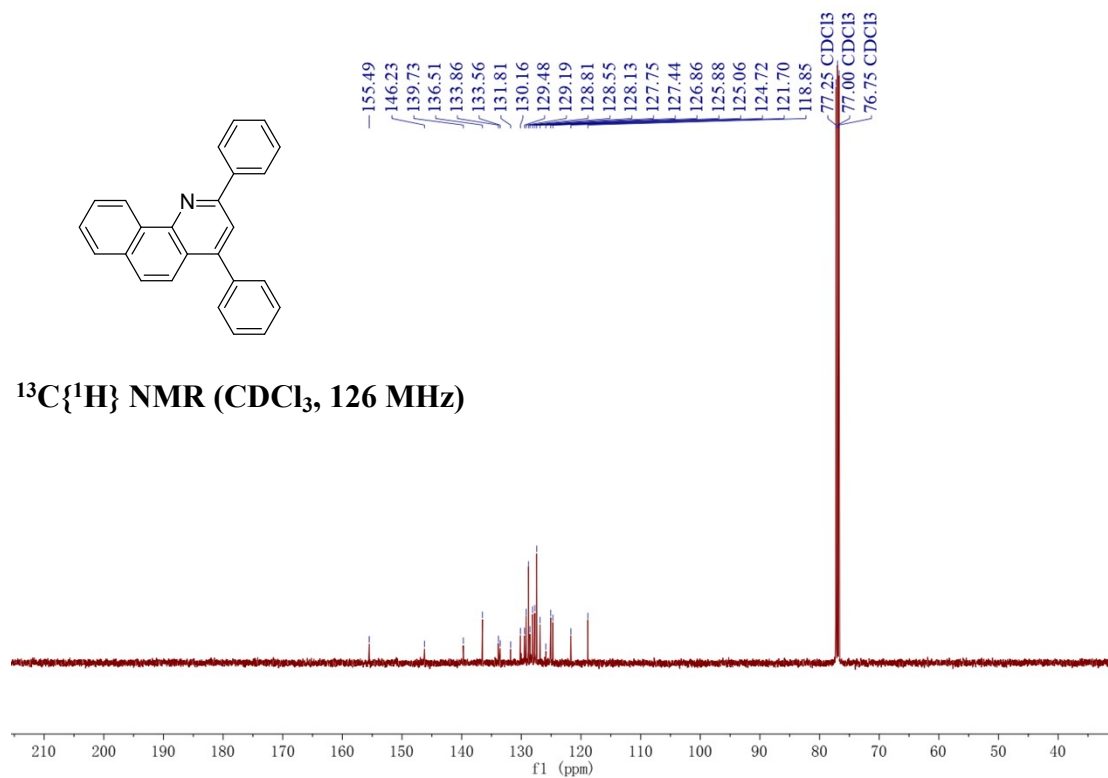

### $^1\text{H}$ NMR Spectrum of Compound d1

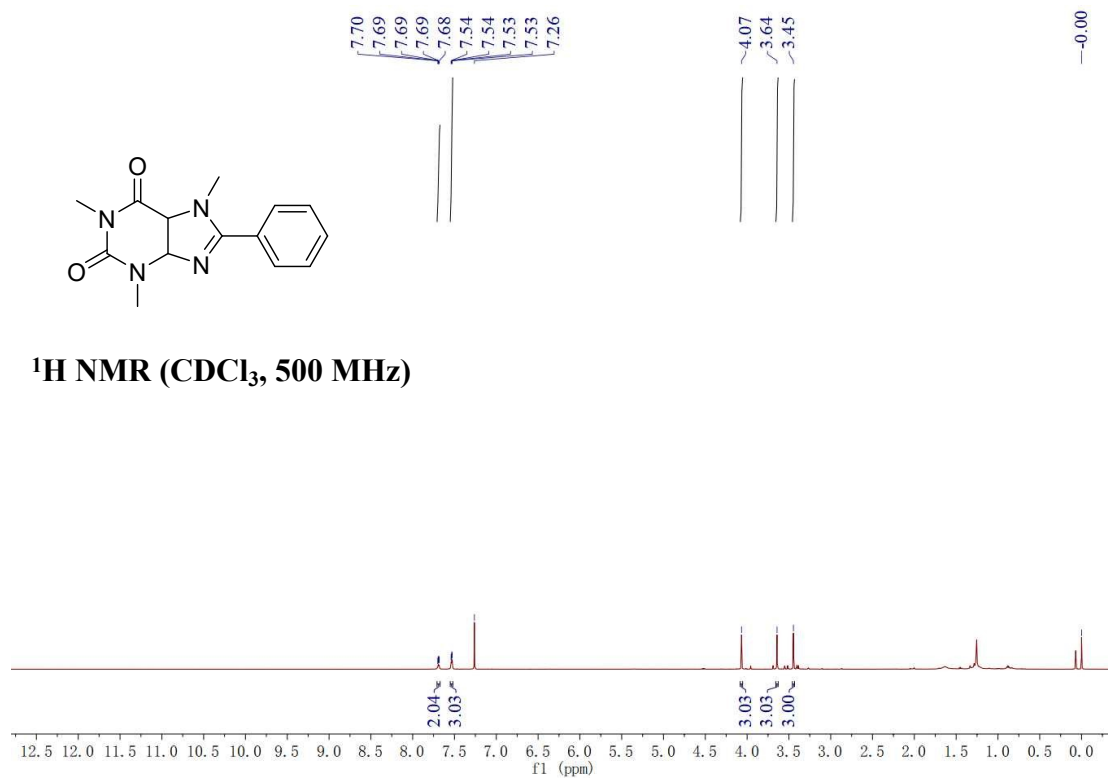

### $^{13}\text{C}\{^1\text{H}\}$ NMR Spectrum of Compound d1

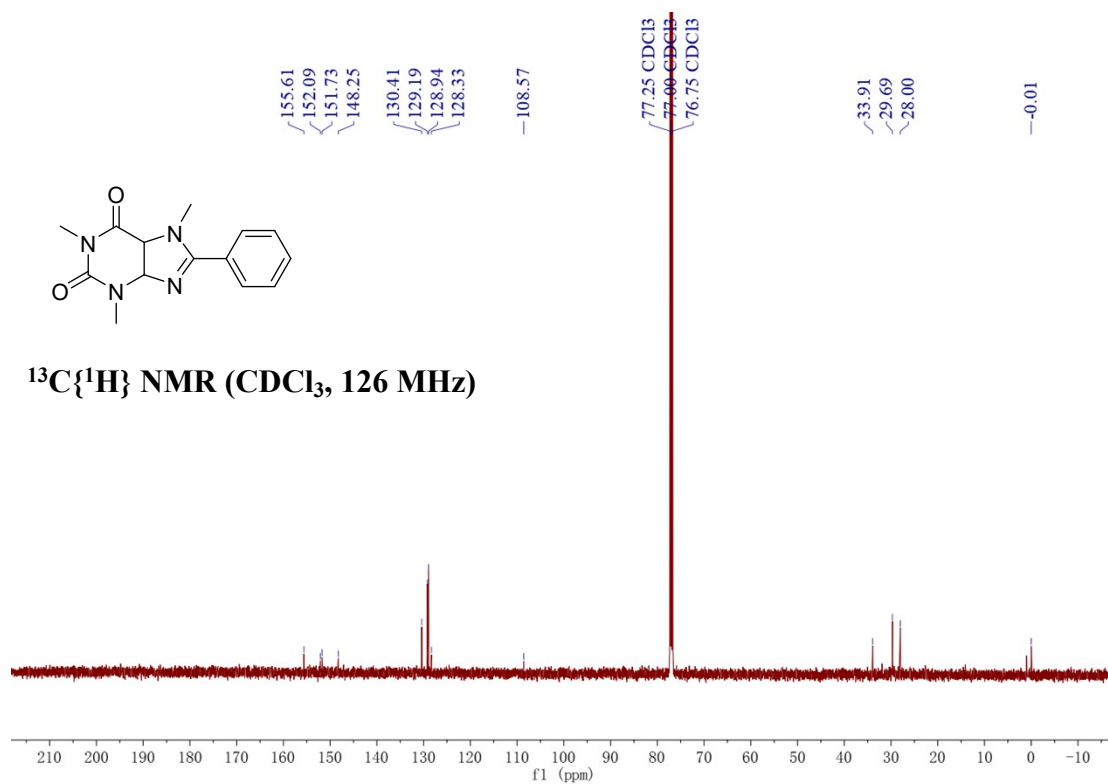

### $^1\text{H}$ NMR Spectrum of Compound d2

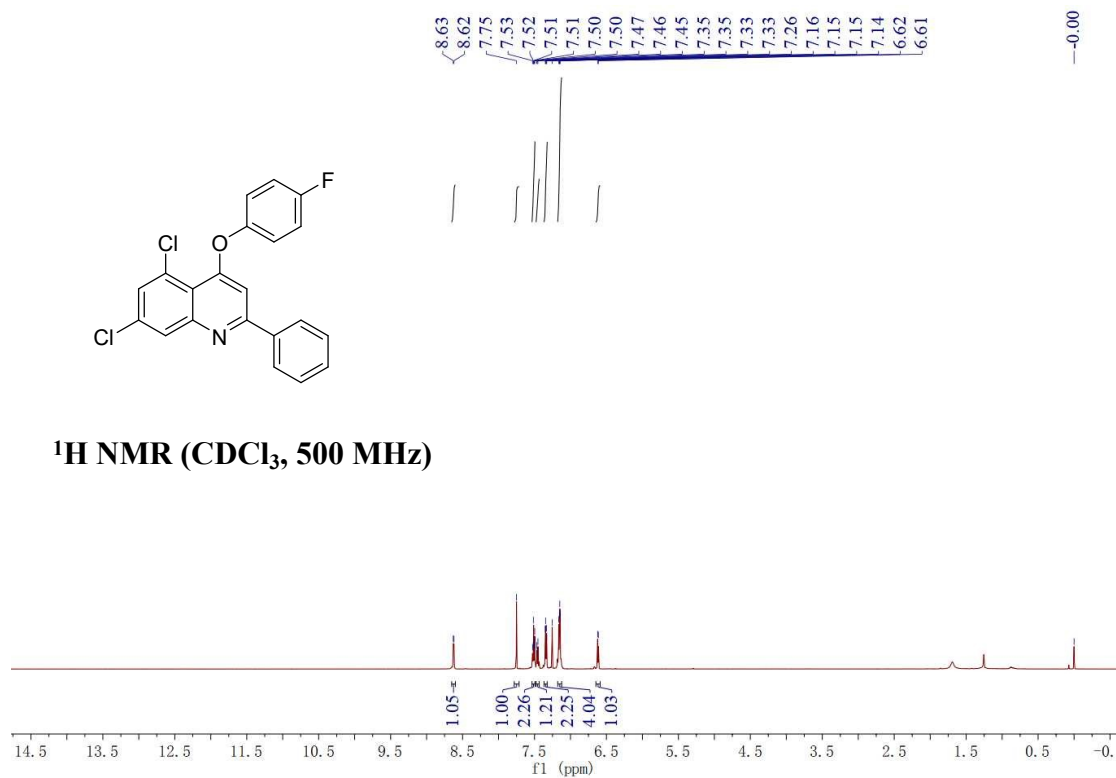



# $^{13}\text{C}\{^1\text{H}\}$ NMR Spectrum of Compound d2

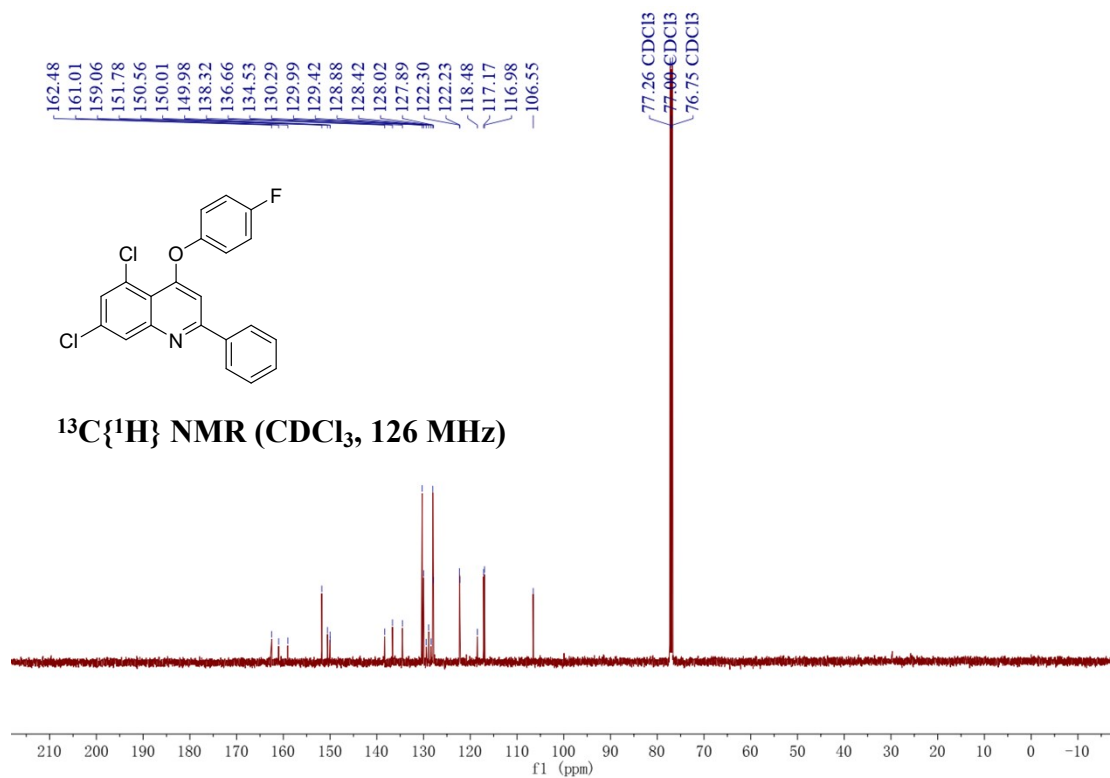

Supplement: d2ob01187e1.pdf [file d2ob01187e1.pdf]
